# Supplementary material for: Updated unified phylogenetic classification system and revised nomenclature for Newcastle disease virus
Source: PubMed Central journal article supplement (PMC6876278; doi:10.1016/j.meegid.2019.103917), 2019-10
Supplement: mmc1.pdf [file mmc1.pdf]

Supplemental Table S1. Complete fusion gene curated dataset of class I NDV used in this study. The green shading represents congruence between trees. Red font represents lack of branch support at the defining node. The naming in bold font (ML naming) is according to the nomenclature suggested in this study. The dataset contains 284 sequences and was used to build the trees depicted in Supplemental Fig. S4 A-C.

|                                                                 |                                                                                      |           |              |           |                    |             |                |                |             |
|-----------------------------------------------------------------|--------------------------------------------------------------------------------------|-----------|--------------|-----------|--------------------|-------------|----------------|----------------|-------------|
| red font = lack of branch support                               |                                                                                      |           |              |           |                    |             |                |                |             |
| bold font = naming based on the criteria accepted in this study |                                                                                      |           |              |           |                    |             |                |                |             |
| green shading = congruence between trees                        |                                                                                      |           |              |           |                    |             |                |                |             |
| <b>Based on<br/>Diel et al.<br/>2012</b>                        | <b>Sub/genotypes based on the<br/>new classification and<br/>nomenclature system</b> |           |              |           |                    |             |                |                |             |
| <b>Genotype</b>                                                 | <b>NJ</b>                                                                            | <b>ML</b> | <b>BAYES</b> | <b>ID</b> | <b>Acc. Number</b> | <b>Host</b> | <b>Country</b> | <b>Isolate</b> | <b>Year</b> |
| 1a                                                              | 1.1.1                                                                                | 1.1.1     | 1.1.1        | 1         | FJ487637           | duck        | China          | 08_004         | 2008        |
| 1a                                                              | 1.1.1                                                                                | 1.1.1     | 1.1.1        | 2         | GQ245777           | chicken     | China          | XZ_35          | 2007        |
| 1a                                                              | 1.1.1                                                                                | 1.1.1     | 1.1.1        | 3         | FJ597582           | duck        | China          | JS_1           | 2007        |
| 1a                                                              | 1.1.1                                                                                | 1.1.1     | 1.1.1        | 4         | FJ597583           | duck        | China          | JS_2           | 2007        |
| 1a                                                              | 1.1.1                                                                                | 1.1.1     | 1.1.1        | 5         | FJ597584           | duck        | China          | JS_16          | 2005        |
| 1a                                                              | 1.1.1                                                                                | 1.1.1     | 1.1.1        | 6         | FJ597588           | duck        | China          | JS_17          | 2006        |
| 1a                                                              | 1.1.1                                                                                | 1.1.1     | 1.1.1        | 7         | FJ597589           | duck        | China          | JS_18          | 2005        |
| 1a                                                              | 1.1.1                                                                                | 1.1.1     | 1.1.1        | 8         | FJ597600           | duck        | China          | ZJ_30          | 2005        |
| 1a                                                              | 1.1.1                                                                                | 1.1.1     | 1.1.1        | 9         | FJ597601           | duck        | China          | ZJ_31          | 2005        |
| 1a                                                              | 1.1.1                                                                                | 1.1.1     | 1.1.1        | 10        | HQ398778           | chicken     | China          | 08_038         | 2008        |
| 1a                                                              | 1.1.1                                                                                | 1.1.1     | 1.1.1        | 11        | HQ398794           | chicken     | China          | 09_020         | 2009        |
| 1a                                                              | 1.1.1                                                                                | 1.1.1     | 1.1.1        | 13        | HQ398799           | chicken     | China          | 09_031         | 2009        |
| 1a                                                              | 1.1.1                                                                                | 1.1.1     | 1.1.1        | 14        | HQ398801           | duck        | China          | 09_042         | 2009        |
| 1a                                                              | 1.1.1                                                                                | 1.1.1     | 1.1.1        | 15        | HQ398802           | chicken     | China          | 09_043         | 2009        |
| 1a                                                              | 1.1.1                                                                                | 1.1.1     | 1.1.1        | 16        | HQ398803           | chicken     | China          | 09_044         | 2009        |
| 1a                                                              | 1.1.1                                                                                | 1.1.1     | 1.1.1        | 18        | HQ398805           | chicken     | China          | 09_047         | 2009        |
| 1a                                                              | 1.1.1                                                                                | 1.1.1     | 1.1.1        | 20        | HQ398807.1         | duck        | China          | 09_049         | 2009        |
| 1a                                                              | 1.1.1                                                                                | 1.1.1     | 1.1.1        | 22        | HQ398809           | duck        | China          | 09_052         | 2009        |
| 1a                                                              | 1.1.1                                                                                | 1.1.1     | 1.1.1        | 23        | HQ398810           | duck        | China          | 09_053         | 2009        |
| 1a                                                              | 1.1.1                                                                                | 1.1.1     | 1.1.1        | 25        | HQ398813           | duck        | China          | 09_056         | 2009        |
| 1a                                                              | 1.1.1                                                                                | 1.1.1     | 1.1.1        | 26        | HQ398814           | duck        | China          | 09_057         | 2009        |
| 1a                                                              | 1.1.1                                                                                | 1.1.1     | 1.1.1        | 27        | HQ997380           | duck        | China          | 10_011         | 2010        |
| 1a                                                              | 1.1.1                                                                                | 1.1.1     | 1.1.1        | 29        | HQ997387           | chicken     | China          | 10_064         | 2010        |
| 1a                                                              | 1.1.1                                                                                | 1.1.1     | 1.1.1        | 30        | HQ997388           | chicken     | China          | 10_067         | 2010        |

|    |       |       |       |    |            |            |       |             |      |
|----|-------|-------|-------|----|------------|------------|-------|-------------|------|
| 1a | 1.1.1 | 1.1.1 | 1.1.1 | 33 | HQ997397   | chicken    | China | 10_089      | 2010 |
| 1a | 1.1.1 | 1.1.1 | 1.1.1 | 34 | JN688862.1 | chicken    | China | JS_09       | 2009 |
| 1a | 1.1.1 | 1.1.1 | 1.1.1 | 35 | JN688864.1 | duck       | China | AH_10       | 2010 |
| 1a | 1.1.1 | 1.1.1 | 1.1.1 | 36 | JN688865.1 | goose      | China | JS_09       | 2009 |
| 1b | 1.1.2 | 1.1.2 | 1.1.2 | 37 | HQ398788   | duck       | China | 09_014      | 2009 |
| 1b | 1.1.2 | 1.1.2 | 1.1.2 | 43 | HQ398795   | chicken    | China | 09_022      | 2009 |
| 1b | 1.1.2 | 1.1.2 | 1.1.2 | 44 | HQ997378   | duck       | China | 10_005      | 2010 |
| 1b | 1.1.2 | 1.1.2 | 1.1.2 | 45 | HQ997379   | duck       | China | 10_006      | 2010 |
| 1b | 1.1.2 | 1.1.2 | 1.1.2 | 46 | HQ997382   | chicken    | China | 10_059      | 2010 |
| 1b | 1.1.2 | 1.1.2 | 1.1.2 | 47 | HQ997383   | duck       | China | 10_060      | 2010 |
| 1b | 1.1.2 | 1.1.2 | 1.1.2 | 51 | HQ997389   | chicken    | China | 10_069      | 2010 |
| 1b | 1.1.2 | 1.1.2 | 1.1.2 | 52 | HQ997390   | chicken    | China | 10_072      | 2010 |
| 1b | 1.1.2 | 1.1.2 | 1.1.2 | 53 | HQ997391   | chicken    | China | 10_079      | 2010 |
| 1b | 1.1.2 | 1.1.2 | 1.1.2 | 54 | HQ997392   | chicken    | China | 10_083      | 2010 |
| 1b | 1.1.2 | 1.1.2 | 1.1.2 | 55 | HQ997393   | chicken    | China | 10_084      | 2010 |
| 1b | 1.1.2 | 1.1.2 | 1.1.2 | 56 | HQ997394   | chicken    | China | 10_085      | 2010 |
| 1b | 1.1.2 | 1.1.2 | 1.1.2 | 57 | HQ997398   | chicken    | China | 10_090      | 2010 |
| 1b | 1.1.2 | 1.1.2 | 1.1.2 | 58 | AB858995.1 | duck       | China | J17_13      | 2013 |
| 1b | 1.1.2 | 1.1.2 | 1.1.2 | 59 | AB858996.1 | duck       | China | J72_13      | 2013 |
| 1b | 1.1.2 | 1.1.2 | 1.1.2 | 60 | AB858997.1 | duck       | China | J55_13      | 2013 |
| 1b | 1.1.2 | 1.1.2 | 1.1.2 | 61 | AB858998.1 | duck       | China | J77_13      | 2013 |
| 1b | 1.1.2 | 1.1.2 | 1.1.2 | 62 | AB858999.1 | duck       | China | J80_13      | 2013 |
| 1b | 1.1.2 | 1.1.2 | 1.1.2 | 63 | AB859000.1 | chicken    | China | J36_13      | 2013 |
| 1b | 1.1.2 | 1.1.2 | 1.1.2 | 64 | AB859001.1 | duck       | China | J70_13      | 2013 |
| 1b | 1.1.2 | 1.1.2 | 1.1.2 | 65 | AB859002.1 | chicken    | China | J2_13       | 2013 |
| 1b | 1.1.2 | 1.1.2 | 1.1.2 | 66 | KJ499462.1 | Black_Swan | China | LHLJ_120608 | 2012 |
| 1b | 1.1.2 | 1.1.2 | 1.1.2 | 67 | KJ607171.1 | peacock    | China | LHLJ_131047 | 2013 |
| 1b | 1.1.2 | 1.1.2 | 1.1.2 | 68 | KM669995.1 | egret      | China | SD21_13     | 2013 |
| 1b | 1.1.2 | 1.1.2 | 1.1.2 | 69 | KM669996.1 | heron      | China | SD22_13     | 2013 |
| 1b | 1.1.2 | 1.1.2 | 1.1.2 | 70 | KM885150.1 | duck       | China | LZJ_068     | 2011 |
| 1b | 1.1.2 | 1.1.2 | 1.1.2 | 71 | KM885151.1 | duck       | China | LJS_215     | 2011 |
| 1b | 1.1.2 | 1.1.2 | 1.1.2 | 72 | KM885152.1 | duck       | China | LZJ_067     | 2011 |
| 1b | 1.1.2 | 1.1.2 | 1.1.2 | 73 | KM885153.1 | duck       | China | LJS_016     | 2011 |
| 1b | 1.1.2 | 1.1.2 | 1.1.2 | 74 | KM885155.1 | duck       | China | LGX_298     | 2011 |
| 1b | 1.1.2 | 1.1.2 | 1.1.2 | 75 | KM885156.1 | duck       | China | LFJ_048     | 2011 |
| 1b | 1.1.2 | 1.1.2 | 1.1.2 | 76 | KM885157.1 | duck       | China | LGD_364     | 2011 |
| 1b | 1.1.2 | 1.1.2 | 1.1.2 | 78 | KM885159.1 | duck       | China | LFJ_104     | 2011 |
| 1b | 1.1.2 | 1.1.2 | 1.1.2 | 79 | KM885160.1 | duck       | China | LFJ_027     | 2011 |
| 1b | 1.1.2 | 1.1.2 | 1.1.2 | 80 | KM885161.1 | duck       | China | LHuB_085    | 2013 |
| 1b | 1.1.2 | 1.1.2 | 1.1.2 | 81 | KM885162.1 | duck       | China | LGX_280     | 2013 |
| 1b | 1.1.2 | 1.1.2 | 1.1.2 | 82 | KM885163.1 | duck       | China | LFJ_073     | 2013 |

|    |       |       |       |     |             |                       |       |                  |      |
|----|-------|-------|-------|-----|-------------|-----------------------|-------|------------------|------|
| 1b | 1.1.2 | 1.1.2 | 1.1.2 | 84  | KM885168.1  | duck                  | China | LGD_358          | 2011 |
| 1b | 1.1.2 | 1.1.2 | 1.1.2 | 85  | HQ398812    | duck                  | China | NDV09_055        | 2009 |
| 1b | 1.1.2 | 1.1.2 | 1.1.2 | 86  | KT223818.1  | pigeon                | China | Qinghai_01       | 2014 |
| 1b | 1.1.2 | 1.1.2 | 1.1.2 | 88  | KT892746.1  | chicken               | China | JL_CC02          | 2015 |
| 1b | 1.1.2 | 1.1.2 | 1.1.2 | 89  | KT892748.1  | chicken               | China | JL_CC03          | 2014 |
| 1b | 1.1.2 | 1.1.2 | 1.1.2 | 94  | KT381589.1  | chicken               | China | Guangdong_GM307  | 2014 |
| 1b | 1.1.2 | 1.1.2 | 1.1.2 | 95  | KT381588.1  | chicken               | China | Guangdong_GM3    | 2013 |
| 1b | 1.1.2 | 1.1.2 | 1.1.2 | 96  | KT381587.1  | pigeon                | China | Guangdong_YF1    | 2014 |
| 1b | 1.1.2 | 1.1.2 | 1.1.2 | 97  | KT381586.1  | duck                  | China | Guangdong_YF827  | 2014 |
| 1b | 1.1.2 | 1.1.2 | 1.1.2 | 99  | KX602322.1  | Sheldrake_Duck        | China | Guizhou_01       | 2016 |
| 1b | 1.1.2 | 1.1.2 | 1.1.2 | 100 | KX602323.1  | Sheldrake_Duck        | China | Guizhou_02       | 2016 |
| 1b | 1.1.2 | 1.1.2 | 1.1.2 | 101 | KY788675.1. | Oriental_magpie_robin | China | GD_ZS44          | 2015 |
| 1b | 1.1.2 | 1.1.2 | 1.1.2 | 102 | KY788674.1. | Chinese_bulbul        | China | GD_ZS23          | 2015 |
| 1b | 1.1.2 | 1.1.2 | 1.1.2 | 272 | KY776595.1  | wild_bird             | China | LTL130830        |      |
| 1b | 1.1.2 | 1.1.2 | 1.1.2 | 274 | MF100763.1  | duck                  | China | D_GD_GZ_817_2016 | 2016 |
| 1b | 1.1.2 | 1.1.2 | 1.1.2 | 276 | MF100761.1  | pigeon                | China | P_GD_HZ_599      | 2016 |
| 1b | 1.1.2 | 1.1.2 | 1.1.2 | 277 | MF100760.1  | pigeon                | China | P_GD_DG_466      | 2016 |
| 1b | 1.1.2 | 1.1.2 | 1.1.2 | 278 | MF100759.1  | pigeon                | China | P_GD_GZ_178      | 2016 |
| 1b | 1.1.2 | 1.1.2 | 1.1.2 | 279 | MF100758.1  | goose                 | China | G_GD_DG_571      | 2016 |
| 1b | 1.1.2 | 1.1.2 | 1.1.2 | 280 | MF100757.1  | goose                 | China | G_GD_HZ_460      | 2016 |
| 1b | 1.1.2 | 1.1.2 | 1.1.2 | 281 | MF100756.1  | goose                 | China | G_GD_YF_401      | 2016 |
| 1b | 1.1.2 | 1.1.2 | 1.1.2 | 282 | MF100755.1  | goose                 | China | G_GD_YF_392      | 2016 |
| 1b | 1.1.2 | 1.1.2 | 1.1.2 | 283 | MF100754.1  | environment_LBM       | China | E_GD_DG_168      | 2016 |
| 1b | 1.1.2 | 1.1.2 | 1.1.2 | 284 | MF100753.1  | environment_LBM       | China | E_GD_YF_580      | 2016 |
| 1b | 1.1.2 | 1.1.2 | 1.1.2 | 285 | MF100752.1  | environment_LBM       | China | E_GD_YF_408      | 2016 |
| 1b | 1.1.2 | 1.1.2 | 1.1.2 | 286 | MF100751.1  | environment_LBM       | China | E_GD_HZ_406      | 2016 |
| 1b | 1.1.2 | 1.1.2 | 1.1.2 | 287 | MF100750.1  | environment_LBM       | China | E_GD_GZ_402      | 2016 |
| 1b | 1.1.2 | 1.1.2 | 1.1.2 | 288 | MF100749.1  | environment_LBM       | China | E_GD_DG_12       | 2016 |
| 1b | 1.1.2 | 1.1.2 | 1.1.2 | 289 | MF100748.1  | duck                  | China | D_GD_GZ_825      | 2016 |
| 1b | 1.1.2 | 1.1.2 | 1.1.2 | 290 | MF100747.1  | duck                  | China | D_GD_DG_822      | 2016 |
| 1b | 1.1.2 | 1.1.2 | 1.1.2 | 291 | MF100746.1  | duck                  | China | D_GD_YF_706      | 2016 |
| 1b | 1.1.2 | 1.1.2 | 1.1.2 | 292 | MF100745.1  | duck                  | China | D_GD_YF_458      | 2016 |
| 1b | 1.1.2 | 1.1.2 | 1.1.2 | 293 | MF100744.1  | duck                  | China | D_GD_YF_193      | 2016 |
| 1b | 1.1.2 | 1.1.2 | 1.1.2 | 294 | MF100743.1  | duck                  | China | D_GD_HZ_154      | 2016 |
| 1b | 1.1.2 | 1.1.2 | 1.1.2 | 295 | MF100742.1  | chicken               | China | C_GD_HZ_140      | 2016 |
| 1b | 1.1.2 | 1.1.2 | 1.1.2 | 296 | MF100741.1  | chicken               | China | C_GD_GZ_999      | 2016 |
| 1b | 1.1.2 | 1.1.2 | 1.1.2 | 298 | MF100739.1  | chicken               | China | C_GD_DG_707      | 2016 |
| 1b | 1.1.2 | 1.1.2 | 1.1.2 | 299 | MF100738.1  | chicken               | China | C_GD_DG_698      | 2016 |
| 1b | 1.1.2 | 1.1.2 | 1.1.2 | 300 | MF100737.1  | chicken               | China | C_GD_DG_618      | 2016 |
| 1b | 1.1.2 | 1.1.2 | 1.1.2 | 301 | MF100736.1  | chicken               | China | C_GD_YF_609      | 2016 |
| 1b | 1.1.2 | 1.1.2 | 1.1.2 | 302 | MF100735.1  | chicken               | China | C_GD_YF_607      | 2016 |

|    |       |       |       |     |            |             |       |             |      |
|----|-------|-------|-------|-----|------------|-------------|-------|-------------|------|
| 1b | 1.1.2 | 1.1.2 | 1.1.2 | 303 | MF100734.1 | chicken     | China | C_GD_YF_445 | 2016 |
| 1b | 1.1.2 | 1.1.2 | 1.1.2 | 304 | MF100733.1 | chicken     | China | C_GD_DG_410 | 2016 |
| 1b | 1.1.2 | 1.1.2 | 1.1.2 | 305 | MF100732.1 | chicken     | China | C_GD_HZ_404 | 2016 |
| 1b | 1.1.2 | 1.1.2 | 1.1.2 | 306 | MF100731.1 | chicken     | China | C_GD_HZ_398 | 2016 |
| 1b | 1.1.2 | 1.1.2 | 1.1.2 | 307 | MF100730.1 | chicken     | China | C_GD_HZ_390 | 2016 |
| 1b | 1.1.2 | 1.1.2 | 1.1.2 | 308 | MF100729.1 | chicken     | China | C_GD_GZ_191 | 2016 |
| 1b | 1.1.2 | 1.1.2 | 1.1.2 | 309 | MF100728.1 | chicken     | China | C_GD_GZ_150 | 2016 |
| 1b | 1.1.2 | 1.1.2 | 1.1.2 | 310 | MF100727.1 | chicken     | China | C_GD_GZ_148 | 2016 |
| 1b | 1.1.2 | 1.1.2 | 1.1.2 | 311 | MK122776.1 | chicken     | China | SC_PT3      | 2016 |
| 1b | 1.1.2 | 1.1.2 | 1.1.2 | 313 | MH274991.1 | chicken     | China | GX_26       | 2015 |
| 1b | 1.1.2 | 1.1.2 | 1.1.2 | 314 | MH274992.1 | chicken     | China | GX_65       | 2015 |
| 1b | 1.1.2 | 1.1.2 | 1.1.2 | 317 | MH289953.1 | Chicken     | China | HN_41M2     | 2017 |
| 1b | 1.1.2 | 1.1.2 | 1.1.2 | 323 | MH289959.1 | Chicken     | China | HN_53L2     | 2017 |
| 1b | 1.1.2 | 1.1.2 | 1.1.2 | 324 | MH289960.1 | Duck        | China | JX_56I2     | 2016 |
| 1b | 1.1.2 | 1.1.2 | 1.1.2 | 327 | MH289963.1 | Chicken     | China | JX_50I2     | 2016 |
| 1b | 1.1.2 | 1.1.2 | 1.1.2 | 330 | MH289966.1 | Environment | China | JX_55U      | 2016 |
| 1b | 1.1.2 | 1.1.2 | 1.1.2 | 334 | MH289970.1 | Environment | China | JX_43X      | 2016 |
| 1b | 1.1.2 | 1.1.2 | 1.1.2 | 336 | MH289932.1 | Chicken     | China | HN_6W1      | 2016 |
| 1b | 1.1.2 | 1.1.2 | 1.1.2 | 348 | MH289944.1 | Duck        | China | JX_69H2     | 2016 |
| 1b | 1.1.2 | 1.1.2 | 1.1.2 | 350 | MH289946.1 | Chicken     | China | JX_19H2     | 2016 |
| 1b | 1.1.2 | 1.1.2 | 1.1.2 | 352 | MH289948.1 | Duck        | China | JX_57C2     | 2016 |
| 1b | 1.1.2 | 1.1.2 | 1.1.2 | 353 | MH289949.1 | Environment | China | JX_Y94      | 2016 |
| 1b | 1.1.2 | 1.1.2 | 1.1.2 | 354 | MH289950.1 | Environment | China | JX_Y95      | 2016 |
| 1b | 1.1.2 | 1.1.2 | 1.1.2 | 357 | MH289913.1 | Wild_birds  | China | HB_F2B6_2   | 2017 |
| 1b | 1.1.2 | 1.1.2 | 1.1.2 | 358 | MH289914.1 | Environment | China | JX_57U      | 2016 |
| 1b | 1.1.2 | 1.1.2 | 1.1.2 | 361 | MH289917.1 | Environment | China | JX_13M      | 2016 |
| 1b | 1.1.2 | 1.1.2 | 1.1.2 | 362 | MH289918.1 | Environment | China | JX_37U      | 2016 |
| 1b | 1.1.2 | 1.1.2 | 1.1.2 | 363 | MH289919.1 | Duck        | China | JX_Y82      | 2016 |
| 1b | 1.1.2 | 1.1.2 | 1.1.2 | 364 | MH289920.1 | Environment | China | JX_Y98      | 2016 |
| 1b | 1.1.2 | 1.1.2 | 1.1.2 | 365 | MH289921.1 | Duck        | China | JX_57A2     | 2016 |
| 1b | 1.1.2 | 1.1.2 | 1.1.2 | 366 | MH289922.1 | Duck        | China | HN_K86      | 2017 |
| 1b | 1.1.2 | 1.1.2 | 1.1.2 | 374 | MH289930.1 | Chicken     | China | HN_K200     | 2017 |
| 1b | 1.1.2 | 1.1.2 | 1.1.2 | 377 | MH289893.1 | Environment | China | HN_79S      | 2016 |
| 1b | 1.1.2 | 1.1.2 | 1.1.2 | 378 | MH289894.1 | Chicken     | China | HN_Y15      | 2016 |
| 1b | 1.1.2 | 1.1.2 | 1.1.2 | 382 | MH289898.1 | Environment | China | HN_K67      | 2017 |
| 1b | 1.1.2 | 1.1.2 | 1.1.2 | 383 | MH289899.1 | Environment | China | JX_47X      | 2016 |
| 1b | 1.1.2 | 1.1.2 | 1.1.2 | 385 | MH289901.1 | Environment | China | JX_108G2    | 2017 |
| 1b | 1.1.2 | 1.1.2 | 1.1.2 | 389 | MH289905.1 | Chicken     | China | JX_82G2     | 2017 |
| 1b | 1.1.2 | 1.1.2 | 1.1.2 | 392 | MH289908.1 | Chicken     | China | JX_30F2     | 2017 |
| 1b | 1.1.2 | 1.1.2 | 1.1.2 | 394 | MH289910.1 | Chicken     | China | HN_19B2     | 2016 |
| 1b | 1.1.2 | 1.1.2 | 1.1.2 | 397 | MH289873.1 | Environment | China | JX_192X     | 2016 |

|    |       |       |       |     |            |                   |            |              |      |
|----|-------|-------|-------|-----|------------|-------------------|------------|--------------|------|
| 1b | 1.1.2 | 1.1.2 | 1.1.2 | 398 | MH289874.1 | Environment       | China      | HN_74W       | 2016 |
| 1b | 1.1.2 | 1.1.2 | 1.1.2 | 399 | MH289875.1 | Chicken           | China      | HN_15W1      | 2016 |
| 1b | 1.1.2 | 1.1.2 | 1.1.2 | 400 | MH289876.1 | Environment       | China      | HN_54S       | 2016 |
| 1b | 1.1.2 | 1.1.2 | 1.1.2 | 402 | MH289878.1 | Chicken           | China      | HN_73V1      | 2016 |
| 1b | 1.1.2 | 1.1.2 | 1.1.2 | 403 | MH289879.1 | Chicken           | China      | HN_Y10       | 2016 |
| 1b | 1.1.2 | 1.1.2 | 1.1.2 | 405 | MH289881.1 | Environment       | China      | HN_78T       | 2016 |
| 1b | 1.1.2 | 1.1.2 | 1.1.2 | 406 | MH289882.1 | Chicken           | China      | HN_91N       | 2016 |
| 1b | 1.1.2 | 1.1.2 | 1.1.2 | 409 | MH289885.1 | Environment       | China      | HN_49S       | 2016 |
| 1b | 1.1.2 | 1.1.2 | 1.1.2 | 414 | MH289890.1 | Environment       | China      | HN_89S       | 2016 |
| 1b | 1.1.2 | 1.1.2 | 1.1.2 | 417 | MH289856.1 | Environment       | China      | HN_35S       | 2016 |
| 1b | 1.1.2 | 1.1.2 | 1.1.2 | 418 | MH289857.1 | Goose             | China      | HN_20S       | 2016 |
| 1b | 1.1.2 | 1.1.2 | 1.1.2 | 419 | MH289858.1 | Chicken           | China      | HN_50W1      | 2016 |
| 1b | 1.1.2 | 1.1.2 | 1.1.2 | 422 | MH289861.1 | Duck              | China      | HN_67B2      | 2016 |
| 1b | 1.1.2 | 1.1.2 | 1.1.2 | 423 | MH289862.1 | Chicken           | China      | JX_16I2      | 2016 |
| 1b | 1.1.2 | 1.1.2 | 1.1.2 | 425 | MH289864.1 | Chicken           | China      | HN_94N       | 2016 |
| 1b | 1.1.2 | 1.1.2 | 1.1.2 | 428 | MH289867.1 | Chicken           | China      | HN_54L2      | 2017 |
| 1b | 1.1.2 | 1.1.2 | 1.1.2 | 429 | MH289868.1 | Chicken           | China      | JX_28A2      | 2016 |
| 1b | 1.1.2 | 1.1.2 | 1.1.2 | 430 | MH289869.1 | Anser_fabalis     | China      | HN_F2_95_1   | 2016 |
| 1b | 1.1.2 | 1.1.2 | 1.1.2 | 431 | MH289870.1 | Chicken           | China      | HN_6T        | 2016 |
| 1c | 1.2   | 1.2   | 1.2   | 104 | FJ597580   | duck              | China      | ZJ_1         | 2002 |
| 1c | 1.2   | 1.2   | 1.2   | 105 | FJ597581   | duck              | China      | ZJ_3         | 2002 |
| 1c | 1.2   | 1.2   | 1.2   | 106 | FJ597585   | duck              | China      | AH_10        | 2006 |
| 1c | 1.2   | 1.2   | 1.2   | 107 | FJ597586   | duck              | China      | FJ_2         | 2002 |
| 1c | 1.2   | 1.2   | 1.2   | 108 | FJ597587   | duck              | China      | JS_9         | 2006 |
| 1c | 1.2   | 1.2   | 1.2   | 109 | HQ008337   | duck              | China      | JS10         | 2010 |
| 1c | 1.2   | 1.2   | 1.2   | 110 | HQ398777   | duck              | China      | 08_037       | 2008 |
| 1c | 1.2   | 1.2   | 1.2   | 112 | HQ398780   | duck              | China      | 08_044       | 2008 |
| 1c | 1.2   | 1.2   | 1.2   | 121 | HQ412767   | duck              | China      | 08_046       | 2008 |
| 1c | 1.2   | 1.2   | 1.2   | 122 | JF893453   | duck              | China      | JX07         | 2007 |
| 1c | 1.2   | 1.2   | 1.2   | 123 | JX844030.1 | mallard           | Finland    | 9147         | 2010 |
| 1c | 1.2   | 1.2   | 1.2   | 124 | AY034801.2 | mallard           | Finland    |              | 1997 |
| 1c | 1.2   | 1.2   | 1.2   | 125 | EU493451.2 | teal              | Finland    | 12104        | 2006 |
| 1c | 1.2   | 1.2   | 1.2   | 126 | EU493454.2 | pochard           | Finland    | 13193        | 2006 |
| 1c | 1.2   | 1.2   | 1.2   | 127 | KC503412.1 | duck              | Japan      | 10UO0343     | 2010 |
| 1c | 1.2   | 1.2   | 1.2   | 128 | KC503483.1 | Slaty_backed_Gull | Russia     | 543FFNK15    | 2007 |
| 1c | 1.2   | 1.2   | 1.2   | 131 | KF361507.1 | mallard           | China      | Jilin        | 2011 |
| 1c | 1.2   | 1.2   | 1.2   | 132 | AB871656.1 | duck              | Japan      | Tottori_453  | 2009 |
| 1c | 1.2   | 1.2   | 1.2   | 133 | AB871657.1 | duck              | Japan      | Tottori_481  | 2009 |
| 1c | 1.2   | 1.2   | 1.2   | 134 | KU366517.1 | shelduck          | Kazakhstan | Chokpak_5717 | 2013 |
| 1c | 1.2   | 1.2   | 1.2   | 135 | DQ097393   | duck              | Germany    | DER49_99     | 1999 |
| 1d | 1.2   | 1.2   | 1.2   | 136 | AY626266   | duck              | USA        | 119535_1     | 2001 |

|    |     |     |     |     |            |                            |        |           |      |
|----|-----|-----|-----|-----|------------|----------------------------|--------|-----------|------|
| 1d | 1.2 | 1.2 | 1.2 | 137 | AY626267   | duck                       | USA    | 154979_1  | 2001 |
| 1d | 1.2 | 1.2 | 1.2 | 138 | AY626268   | chicken                    | USA    | 101250_2  | 2001 |
| 1d | 1.2 | 1.2 | 1.2 | 139 | EF612277   | Northern_Pintail           | AK_USA | 196       | 1998 |
| 1d | 1.2 | 1.2 | 1.2 | 140 | EF564813   | Green_winged_Teal          | AK_USA | 176       | 1998 |
| 1d | 1.2 | 1.2 | 1.2 | 143 | EF564819   | red_knot                   | DE_USA | 2026      | 2002 |
| 1d | 1.2 | 1.2 | 1.2 | 144 | EF564820   | mallard                    | MD_USA | 04_125    | 2004 |
| 1d | 1.2 | 1.2 | 1.2 | 145 | EF564822   | mallard                    | MD_USA | 04_364    | 2004 |
| 1d | 1.2 | 1.2 | 1.2 | 146 | EF564823   | duck                       | OH_USA | 04_612    | 2004 |
| 1d | 1.2 | 1.2 | 1.2 | 147 | EF564825   | mallard                    | MD_USA | 02_336    | 2002 |
| 1d | 1.2 | 1.2 | 1.2 | 148 | EF564827   | environment                | MD_USA | _03_62    | 2003 |
| 1d | 1.2 | 1.2 | 1.2 | 149 | EF564828   | mallard                    | MD_USA | 03_808    | 2003 |
| 1d | 1.2 | 1.2 | 1.2 | 150 | EF564829   | mallard                    | MD_USA | 01_418    | 2001 |
| 1d | 1.2 | 1.2 | 1.2 | 151 | EF564830   | Ruddy_Turnstone            | MD_USA | 01_523    | 2001 |
| 1d | 1.2 | 1.2 | 1.2 | 152 | JN942004.1 |                            | NJ_USA | 13890_2   | 2010 |
| 1d | 1.2 | 1.2 | 1.2 | 153 | JN942005.1 | muscovy_duck               | PA_USA | 10145     | 2010 |
| 1d | 1.2 | 1.2 | 1.2 | 154 | JN942006.1 |                            | NJ_USA | 32796_2   | 2009 |
| 1d | 1.2 | 1.2 | 1.2 | 155 | JN942007.1 |                            | PA_USA | 33250     | 2009 |
| 1d | 1.2 | 1.2 | 1.2 | 156 | JN942008.1 | chicken                    | FL_USA | 31670_4   | 2009 |
| 1d | 1.2 | 1.2 | 1.2 | 157 | JN942009.1 | mallard                    | CT_USA | 7847_2    | 2009 |
| 1d | 1.2 | 1.2 | 1.2 | 158 | JN942010.1 | Northern_Pintail           | MI_USA | 28171_16  | 2009 |
| 1d | 1.2 | 1.2 | 1.2 | 159 | JN942011.1 | raptor                     | MN_USA | 18575_1   | 2009 |
| 1d | 1.2 | 1.2 | 1.2 | 160 | JN942012.1 | mallard                    | WI_USA | 22853     | 2009 |
| 1d | 1.2 | 1.2 | 1.2 | 161 | JN942015.1 | mallard                    | OH_USA | 2080_2    | 2008 |
| 1d | 1.2 | 1.2 | 1.2 | 162 | JN941987.1 | Northern_Pintail           | ID_USA | 19663_2   | 2009 |
| 1d | 1.2 | 1.2 | 1.2 | 163 | KC503424.1 | Northern_Pintail           | AK_USA | 44339_630 | 2007 |
| 1d | 1.2 | 1.2 | 1.2 | 165 | KC503426.1 | Northern_Pintail           | AK_USA | 44339_819 | 2007 |
| 1d | 1.2 | 1.2 | 1.2 | 167 | KC503428.1 | Northern_Pintail           | AK_USA | 44339_832 | 2007 |
| 1d | 1.2 | 1.2 | 1.2 | 168 | KC503429.1 | Northern_Pintail           | AK_USA | 44339_835 | 2007 |
| 1d | 1.2 | 1.2 | 1.2 | 169 | KC503430.1 | Northern_Pintail           | AK_USA | 44340_136 | 2007 |
| 1d | 1.2 | 1.2 | 1.2 | 174 | KC503435.1 | Great_White_fronted_Goose  | AK_USA | 44398_192 | 2008 |
| 1d | 1.2 | 1.2 | 1.2 | 175 | KC503436.1 | Northern_Pintail           | AK_USA | 44419_059 | 2008 |
| 1d | 1.2 | 1.2 | 1.2 | 177 | KC503438.1 | Northern_Pintail           | AK_USA | 44420_025 | 2008 |
| 1d | 1.2 | 1.2 | 1.2 | 178 | KC503439.1 | Northern_Pintail           | AK_USA | 44420_048 | 2008 |
| 1d | 1.2 | 1.2 | 1.2 | 179 | KC503440.1 | Northern_Pintail           | AK_USA | 44420_067 | 2008 |
| 1d | 1.2 | 1.2 | 1.2 | 181 | KC503442.1 | Northern_Pintail           | AK_USA | 44420_080 | 2008 |
| 1d | 1.2 | 1.2 | 1.2 | 182 | KC503443.1 | Northern_Pintail           | AK_USA | 44420_088 | 2008 |
| 1d | 1.2 | 1.2 | 1.2 | 183 | KC503444.1 | Northern_Pintail           | AK_USA | 44420_127 | 2008 |
| 1d | 1.2 | 1.2 | 1.2 | 185 | KC503446.1 | American_Green_winged_Teal | AK_USA | 44493_409 | 2009 |
| 1d | 1.2 | 1.2 | 1.2 | 186 | KC503448.1 | American_Green_winged_Teal | AK_USA | 44493_503 | 2009 |
| 1d | 1.2 | 1.2 | 1.2 | 187 | KC503449.1 | American_Green_winged_Teal | AK_USA | 44493_560 | 2009 |
| 1d | 1.2 | 1.2 | 1.2 | 188 | KC503450.1 | Northern_Pintail           | AK_USA | 44493_701 | 2009 |

|    |     |     |     |     |            |                            |        |           |      |
|----|-----|-----|-----|-----|------------|----------------------------|--------|-----------|------|
| 1d | 1.2 | 1.2 | 1.2 | 190 | KC503456.1 | American_Green_winged_Teal | AK_USA | 44493_736 | 2009 |
| 1d | 1.2 | 1.2 | 1.2 | 191 | KC503457.1 | Northern_Pintail           | AK_USA | 44493_737 | 2009 |
| 1d | 1.2 | 1.2 | 1.2 | 194 | KC503460.1 | American_Green_winged_Teal | AK_USA | 44493_751 | 2009 |
| 1d | 1.2 | 1.2 | 1.2 | 195 | KC503461.1 | Northern_Pintail           | AK_USA | 44493_762 | 2009 |
| 1d | 1.2 | 1.2 | 1.2 | 196 | KC503462.1 | Northern_Pintail           | AK_USA | 44493_765 | 2009 |
| 1d | 1.2 | 1.2 | 1.2 | 197 | KC503463.1 | Northern_Pintail           | AK_USA | 44493_773 | 2009 |
| 1d | 1.2 | 1.2 | 1.2 | 198 | KC503464.1 | Northern_Pintail           | AK_USA | 44493_779 | 2009 |
| 1d | 1.2 | 1.2 | 1.2 | 199 | KC503468.1 | Northern_Pintail           | AK_USA | 44493_828 | 2009 |
| 1d | 1.2 | 1.2 | 1.2 | 200 | KC503470.1 | Northern_Pintail           | AK_USA | 44493_865 | 2009 |
| 1d | 1.2 | 1.2 | 1.2 | 201 | KC503472.1 | Northern_Pintail           | AK_USA | 44494_659 | 2009 |
| 1d | 1.2 | 1.2 | 1.2 | 204 | KC503475.1 | American_Green_winged_Teal | AK_USA | 44494_794 | 2009 |
| 1d | 1.2 | 1.2 | 1.2 | 205 | KF444680.1 | Mute_Swan                  | NJ_USA | 1180      | 2012 |
| 1d | 1.2 | 1.2 | 1.2 | 206 | KF444681.1 | Mute_Swan                  | MI_USA | 780       | 2012 |
| 1d | 1.2 | 1.2 | 1.2 | 207 | KP780877   | mallard                    | ID_USA | ND0001525 | 2013 |
| 1d | 1.2 | 1.2 | 1.2 | 208 | KP780878   | American_Green_winged_Teal | AK_USA | ND0007164 | 2013 |
| 1d | 1.2 | 1.2 | 1.2 | 211 | KX857666   | Red_Knot                   | NJ_USA | AI07_1039 | 2007 |
| 1d | 1.2 | 1.2 | 1.2 | 213 | KX857668   | mallard                    | MN_USA | AI07_3115 | 2007 |
| 1d | 1.2 | 1.2 | 1.2 | 214 | KX857669   | Herring_Gull               | NJ_USA | AI08_1534 | 2008 |
| 1d | 1.2 | 1.2 | 1.2 | 215 | KX857670   | mallard                    | MN_USA | AI08_2152 | 2008 |
| 1d | 1.2 | 1.2 | 1.2 | 216 | KX857671   | Ring_billed_Gull           | MN_USA | AI08_2203 | 2008 |
| 1d | 1.2 | 1.2 | 1.2 | 217 | KX857672   | Blue_winged_Teal           | MN_USA | AI08_2490 | 2008 |
| 1d | 1.2 | 1.2 | 1.2 | 218 | KX857673   | American_Green_winged_Teal | MN_USA | AI08_4970 | 2008 |
| 1d | 1.2 | 1.2 | 1.2 | 219 | KX857674   | mallard                    | MN_USA | AI08_4984 | 2008 |
| 1d | 1.2 | 1.2 | 1.2 | 220 | KX857675   | Herring_Gull               | NJ_USA | AI09_209  | 2009 |
| 1d | 1.2 | 1.2 | 1.2 | 221 | KX857676   | Ruddy_Turnstone            | DE_USA | AI09_619  | 2009 |
| 1d | 1.2 | 1.2 | 1.2 | 222 | KX857677   | Franklins_Gull             | MN_USA | AI09_1548 | 2009 |
| 1d | 1.2 | 1.2 | 1.2 | 223 | KX857678   | mallard                    | MN_USA | AI09_2529 | 2009 |
| 1d | 1.2 | 1.2 | 1.2 | 224 | KX857679   | American_Green_winged_Teal | MN_USA | AI09_3588 | 2009 |
| 1d | 1.2 | 1.2 | 1.2 | 225 | KX857680   | Greater_Black_backed_Gull  | NJ_USA | AI10_835  | 2010 |
| 1d | 1.2 | 1.2 | 1.2 | 226 | KX857681   | Laughing_Gull              | NJ_USA | AI10_991  | 2010 |
| 1d | 1.2 | 1.2 | 1.2 | 227 | KX857682   | mallard                    | MN_USA | AI10_3156 | 2010 |
| 1d | 1.2 | 1.2 | 1.2 | 228 | KX857683   | Blue_winged_Teal           | LA_USA | AI10_3541 | 2010 |
| 1d | 1.2 | 1.2 | 1.2 | 229 | KX857684   | American_Green_winged_Teal | MN_USA | AI10_4299 | 2010 |
| 1d | 1.2 | 1.2 | 1.2 | 230 | KX857685   | Blue_winged_Teal           | TX_USA | AI10_4457 | 2010 |
| 1d | 1.2 | 1.2 | 1.2 | 231 | KX857686   | mallard                    | NJ_USA | AI10_4506 | 2010 |
| 1d | 1.2 | 1.2 | 1.2 | 232 | KX857687   | Ruddy_Turnstone            | NJ_USA | AI11_982  | 2011 |
| 1d | 1.2 | 1.2 | 1.2 | 234 | KX857689   | mallard                    | MN_USA | AI11_4744 | 2011 |
| 1d | 1.2 | 1.2 | 1.2 | 235 | KX857690   | Gadwall                    | MN_USA | AI12_3182 | 2012 |
| 1d | 1.2 | 1.2 | 1.2 | 236 | KX857691   | mallard                    | MN_USA | AI12_4502 | 2012 |
| 1d | 1.2 | 1.2 | 1.2 | 237 | KX857692   | Ruddy_Turnstone            | NJ_USA | AI13_2469 | 2013 |
| 1d | 1.2 | 1.2 | 1.2 | 238 | KX857693   | mallard                    | MN_USA | AI13_3303 | 2013 |

|      |         |                |         |     |            |                  |           |              |      |
|------|---------|----------------|---------|-----|------------|------------------|-----------|--------------|------|
| 1d   | 1.2     | 1.2            | 1.2     | 239 | KX857694   | Blue_winged_Teal | TX_USA    | AI13_3994    | 2013 |
| 1d   | 1.2     | 1.2            | 1.2     | 240 | KX857695   | Blue_winged_Teal | TX_USA    | AI13_4042    | 2013 |
| 1d   | 1.2     | 1.2            | 1.2     | 241 | KX857696   | Blue_winged_Teal | TX_USA    | AI14_2572    | 2014 |
| 1d   | 1.2     | 1.2            | 1.2     | 266 | KU748779.1 | duck             | China     | Guangxi_1261 | 2015 |
| UNCL | UNCL9   | <b>UNCL9</b>   | UNCL9   | 255 | EF564815   | dunlin           | DE_USA    | A100_2093    | 2000 |
| UNCL | UNCL10  | <b>UNCL10</b>  | UNCL10  | 256 | EF564831   | Ruddy_Turnstone  | DE_USA    | 401          | 2004 |
| UNCL | UNCL11  | <b>UNCL11</b>  | UNCL11  | 257 | KC503417.1 | Rred_Knot        | AK_USA    | 44308_062    | 2007 |
| UNCL | UNCL12  | <b>UNCL12</b>  | UNCL12  | 261 | KC503421.1 | Black_Brant      | AK_USA    | 44328_651    | 2007 |
| UNCL | 1.1     | 1.2            | 1.2     | 262 | EF564824   | mallard          | MD_USA    | 02_217       | 2002 |
| UNCL | 1.1     | 1.1            | 1.1     | 263 | AB524405   | goose            | AK_USA    | 415          | 1991 |
| UNCL | 1.1     | 1.1            | 1.1     | 264 | HQ398796   | duck             | China     | 09_026       | 2009 |
| UNCL | 1.1     | 1.1            | 1.1     | 265 | HQ398797   | duck             | China     | 09_027       | 2009 |
| UNCL | UNCL14  | <b>UNCL14</b>  | UNCL14  | 267 | EF564833   | Canada_Goose     | OH_USA    | OH_87_78     | 1987 |
| UNCL | UNCL_13 | <b>UNCL_13</b> | UNCL_13 | 312 | KP123431.2 | mute_swan        | Macedonia | 546          | 2012 |
