# Supplementary material for: Updated unified phylogenetic classification system and revised nomenclature for Newcastle disease virus
Source: PubMed Central journal article supplement (PMC6876278; doi:10.1016/j.meegid.2019.103917), 2019-10
Supplement: mmc2.pdf [file mmc2.pdf]

Supplemental Table S2. Complete fusion gene curated dataset of class II NDV used in this study. The green shading represents congruence between trees. Red font represents lack of branch support at the defining node. The naming in bold font (ML naming) is according to the nomenclature suggested in this study. The dataset contains 1672 sequences and was used to build the trees depicted in Supplemental Fig. S5 A-C.

| red font = lack of branch support                               |                                                                   |         |         |      |             |                   |           |                |      |
|-----------------------------------------------------------------|-------------------------------------------------------------------|---------|---------|------|-------------|-------------------|-----------|----------------|------|
| bold font = naming based on the criteria accepted in this study |                                                                   |         |         |      |             |                   |           |                |      |
| green shading = congruence between trees                        |                                                                   |         |         |      |             |                   |           |                |      |
| Based on Diel et al. 2012                                       | Genotypes based on the new classification and nomenclature system |         |         | ID   | Acc. Number | Host              | Country   | Isolate        | Year |
| Genotype                                                        | NJ                                                                | ML      | BAYES   |      |             |                   |           |                |      |
| I_a                                                             | I.1.1                                                             | I.1.1   | I.1.1   | 36   | AF217084    | chicken           | Australia | Queensland_V_4 | 1966 |
| I_a                                                             | I.1.1                                                             | I.1.1   | I.1.1   | 38   | AY935490    | chicken           | Australia | 02_1334        | 2002 |
| I_a                                                             | I.1.1                                                             | I.1.1   | I.1.1   | 39   | AY935491    | chicken           | Australia | 98_1154        | 1998 |
| I_a                                                             | I.1.1                                                             | I.1.1   | I.1.1   | 40   | AY935492    | chicken           | Australia | 98_1249        | 1998 |
| I_a                                                             | I.1.1                                                             | I.1.1   | I.1.1   | 41   | AY935493    | chicken           | Australia | 98_1252        | 1998 |
| I_a                                                             | I.1.1                                                             | I.1.1   | I.1.1   | 42   | AY935494    | chicken           | Australia | 99_0655        | 1999 |
| I_a                                                             | I.1.1                                                             | I.1.1   | I.1.1   | 43   | AY935495    | chicken           | Australia | 99_0868_hi     | 1999 |
| I_a                                                             | I.1.1                                                             | I.1.1   | I.1.1   | 44   | AY935496    | chicken           | Australia | 99_0868_lo     | 1999 |
| I_a                                                             | I.1.1                                                             | I.1.1   | I.1.1   | 45   | AY935497    | chicken           | Australia | 1997PR_32      | 1999 |
| I_a                                                             | I.1.1                                                             | I.1.1   | I.1.1   | 46   | AY935498    | chicken           | Australia | 99_1435        | 1999 |
| I_a                                                             | I.1.1                                                             | I.1.1   | I.1.1   | 47   | GU332645    | chicken           | Australia | 9809_19_1107   | 1998 |
| I_a                                                             | I.1.1                                                             | I.1.1   | I.1.1   | 54   | M24692      | chicken           | Australia | D26_76         | 1999 |
| I_a                                                             | I.1.1                                                             | I.1.1   | I       | 55   | M24693      | chicken           | Australia | Queensland     | 1966 |
| I_a                                                             | I.1.1                                                             | I.1.1   | I.1.1   | 2135 | MG869263.1  | chicken           | Vietnam   | NVNvac12       | 2016 |
| I_c                                                             | I.2                                                               | I.1.2.1 | I.1.2.1 | 165  | EF564816    | redknot           | NJ_USA    | A_101_1383     | 2001 |
| I_c                                                             | I.2                                                               | I.1.2.1 | I.1.2.1 | 166  | GQ918280    | black_headed_gull | Sweden    |                | 1994 |
| I_c                                                             | I.2                                                               | I.1.2.1 | I.1.2.1 | 167  | KC503478    | slaty_backedgull  | Japan     | 9KS_0098       | 2009 |
| I_c                                                             | I.2                                                               | I.1.2.1 | I.1.2.1 | 172  | KX352834    | gull              | Russia    | Tyva_14        | 2014 |
| I_d                                                             | I.1.2.2                                                           | I.1.2.2 | I.1.2.2 | 174  | AB465607    | chicken           | Japan     | Ishi           | 1962 |
| I_d                                                             | I.1.2.2                                                           | I.1.2.2 | I.1.2.2 | 175  | EF564817    | ruddyturnstone    | DE_USA    | 492            | 2002 |
| I_d                                                             | I.1.2.2                                                           | I.1.2.2 | I.1.2.2 | 176  | KC503476    | northern_pintail  | AK_USA    | 44500_136_     | 2009 |

|     |         |         |         |     |          |                            |            |                  |      |
|-----|---------|---------|---------|-----|----------|----------------------------|------------|------------------|------|
| I_d | I.1.2.2 | I.1.2.2 | I.1.2.2 | 177 | KC503479 | redpoll                    | Russia     | Nikita_530_FFNK2 | 2008 |
| I_d | I.1.2.2 | I.1.2.2 | I.1.2.2 | 178 | KX857711 | American_green_winged_teal | MN_USA     | AI09_3831        | 2009 |
| I_b | I.1.2.1 | I.2     | I.2     | 71  | AB871655 | duck                       | Japan      | Tottori_N12      | 2006 |
| I_b | I.1.2.1 | I.2     | I.2     | 72  | AY965077 | Baikal_teal                | Russia     | FarEast_3658     | 2002 |
| I_b | I.1.2.1 | I.2     | I.2     | 73  | AY965078 | duck                       | Russia     | FarEast_2686     | 2001 |
| I_b | I.1.2.1 | I.2     | I.2     | 74  | AY965079 | duck                       | Russia     | FarEast_2713     | 2001 |
| I_b | I.1.2.1 | I.2     | I.2     | 75  | AY972101 | Baikal_teal                | Russia     | FarEast_3652     | 2002 |
| I_b | I.1.2.1 | I.2     | I.2     | 76  | EF564821 | mallard                    | PA_USA     | MD_04_204        | 2004 |
| I_b | I.1.2.1 | I.2     | I.2     | 77  | FJ597603 | duck                       | China      | AH_5             | 2004 |
| I_b | I.1.2.1 | I.2     | I.2     | 78  | FJ597604 | duck                       | China      | AH_6             | 2004 |
| I_b | I.1.2.1 | I.2     | I.2     | 79  | FJ597605 | duck                       | China      | AH_13            | 2004 |
| I_b | I.1.2.1 | I.2     | I.2     | 80  | FJ597606 | duck                       | China      | JS_40            | 2005 |
| I_b | I.1.2.1 | I.2     | I.2     | 81  | FJ597607 | duck                       | China      | JS_41            | 2005 |
| I_b | I.1.2.1 | I.2     | I.2     | 82  | FJ597608 | duck                       | China      | JS_42            | 2005 |
| I_b | I.1.2.1 | I.2     | I.2     | 83  | FJ597609 | duck                       | China      | JS_51            | 2005 |
| I_b | I.1.2.1 | I.2     | I.2     | 84  | FJ597610 | duck                       | China      | JS_53            | 2005 |
| I_b | I.1.2.1 | I.2     | I.2     | 85  | FJ597611 | duck                       | China      | JS_14            | 2005 |
| I_b | I.1.2.1 | I.2     | I.2     | 86  | FJ597612 | duck                       | China      | S15              | 2005 |
| I_b | I.1.2.1 | I.2     | I.2     | 87  | FJ597613 | duck                       | China      | ZJ_1             | 2004 |
| I_b | I.1.2.1 | I.2     | I.2     | 88  | FJ597614 | duck                       | China      | ZJ_2             | 2004 |
| I_b | I.1.2.1 | I.2     | I.2     | 89  | FJ597615 | duck                       | China      | ZJ_3             | 2004 |
| I_b | I.1.2.1 | I.2     | I.2     | 90  | FJ597616 | duck                       | China      | ZJ_50            | 2005 |
| I_b | I.1.2.1 | I.2     | I.2     | 91  | FJ597617 | duck                       | China      | HN_34            | 2005 |
| I_b | I.1.2.1 | I.2     | I.2     | 92  | FJ597618 | duck                       | China      | HN_36            | 2005 |
| I_b | I.1.2.1 | I.2     | I.2     | 93  | FJ597619 | duck                       | China      | HN_37            | 2005 |
| I_b | I.1.2.1 | I.2     | I.2     | 94  | FJ597620 | duck                       | China      | JS_39            | 2005 |
| I_b | I.1.2.1 | I.2     | I.2     | 95  | FJ600539 | mule_duck                  | China      | FJ0801           | 2008 |
| I_b | I.1.2.1 | I.2     | I.2     | 96  | HE972210 | duck                       | Luxembourg | 3785             | 2007 |
| I_b | I.1.2.1 | I.2     | I.2     | 97  | HE972213 | mallard                    | Luxembourg | 4178             | 2008 |
| I_b | I.1.2.1 | I.2     | I.2     | 98  | HG326605 | spur_wingedgoose           | Nigeria    | NIE08_0121       | 2008 |
| I_b | I.1.2.1 | I.2     | I.2     | 99  | HG326606 | wingedgoose                | Nigeria    | NIE08_0124       | 2008 |
| I_b | I.1.2.1 | I.2     | I.2     | 100 | HM063422 | feralduck                  | China      | D3_Guang_dong    | 2007 |
| I_b | I.1.2.1 | I.2     | I.2     | 101 | HM125898 | duck                       | China      | WDK_Jiangxi_7793 | 2004 |
| I_b | I.1.2.1 | I.2     | I.2     | 102 | JN653339 | Muscovy_duck               | China      | M4               | 2007 |

|     |         |     |     |     |          |                            |             |                     |      |
|-----|---------|-----|-----|-----|----------|----------------------------|-------------|---------------------|------|
| I_b | I.1.2.1 | I.2 | I.2 | 103 | JN872169 | environment                | AK_USA      | Pennsylvania_3167   | 2009 |
| I_b | I.1.2.1 | I.2 | I.2 | 104 | JQ966077 | mallard                    | South_Korea | WB_KU17_08          | 2008 |
| I_b | I.1.2.1 | I.2 | I.2 | 105 | JQ966078 | Eurasian_teal              | South_Korea | WB_KU22_1           | 2007 |
| I_b | I.1.2.1 | I.2 | I.2 | 106 | JQ966082 | mallard                    | South_Korea | WB_KU146            | 2008 |
| I_b | I.1.2.1 | I.2 | I.2 | 107 | JQ966083 | wild_bird                  | South_Korea | WB_KU164            | 2009 |
| I_b | I.1.2.1 | I.2 | I.2 | 108 | JQ966084 | mallard                    | South_Korea | WB_KU628            | 2009 |
| I_b | I.1.2.1 | I.2 | I.2 | 109 | JQ966085 | mallard                    | South_Korea | WB_KU762            | 2008 |
| I_b | I.1.2.1 | I.2 | I.2 | 110 | JX193077 | duck                       | China       | Guangxi16           | 2008 |
| I_b | I.1.2.1 | I.2 | I.2 | 111 | JX193078 | duck                       | China       | Guangxi17           | 2009 |
| I_b | I.1.2.1 | I.2 | I.2 | 112 | JX193081 | duck                       | China       | Guangxi20           | 2010 |
| I_b | I.1.2.1 | I.2 | I.2 | 113 | JX193083 | duck                       | China       | Guangxi22           | 2010 |
| I_b | I.1.2.1 | I.2 | I.2 | 114 | JX401403 | mallard                    | South_Korea | CBU2249             | 2007 |
| I_b | I.1.2.1 | I.2 | I.2 | 115 | JX401404 | mallard                    | South_Korea | CBU2179             | 2007 |
| I_b | I.1.2.1 | I.2 | I.2 | 116 | JX401405 | mallard                    | South_Korea | CBU2374             | 2007 |
| I_b | I.1.2.1 | I.2 | I.2 | 117 | JX518873 | Meller_sduck               | Madagascar  | MGA057C             | 2009 |
| I_b | I.1.2.1 | I.2 | I.2 | 118 | JX518874 | red_billed_teal            | Madagascar  | MGA284C             | 2009 |
| I_b | I.1.2.1 | I.2 | I.2 | 119 | KC503411 | northern_pintail           | Japan       | 10EY0020            | 2010 |
| I_b | I.1.2.1 | I.2 | I.2 | 120 | KC503413 | duck                       | Japan       | 10UO0501            | 2010 |
| I_b | I.1.2.1 | I.2 | I.2 | 121 | KC503422 | spectacled_eider           | AK_USA      | AK_44332_723        | 2007 |
| I_b | I.1.2.1 | I.2 | I.2 | 122 | KC503447 | Amer_green_wingedteal      | AK_USA      | AK_44493_444        | 2009 |
| I_b | I.1.2.1 | I.2 | I.2 | 123 | KC503453 | Amer_green_wingedteal      | AK_USA      | AK_44493_716        | 2009 |
| I_b | I.1.2.1 | I.2 | I.2 | 124 | KC503455 | northern_pintail           | AK_USA      | AK_44493_723        | 2009 |
| I_b | I.1.2.1 | I.2 | I.2 | 125 | KC503467 | northern_pintail           | AK_USA      | AK_44493_801        | 2009 |
| I_b | I.1.2.1 | I.2 | I.2 | 126 | KC503469 | northern_pintail           | AK_USA      | AK_44493_830        | 2009 |
| I_b | I.1.2.1 | I.2 | I.2 | 127 | KC503471 | american_green_winged_teal | AK_USA      | AK_44493_893        | 2009 |
| I_b | I.1.2.1 | I.2 | I.2 | 128 | KC503481 | coot                       | Russia      | 538_FF NK10         | 2007 |
| I_b | I.1.2.1 | I.2 | I.2 | 129 | KC503482 | slaty_backedgull           | Russia      | Nikita_539_FF NK11  | 2007 |
| I_b | I.1.2.1 | I.2 | I.2 | 130 | KC750151 | duck                       | China       | GD_SH               | 2005 |
| I_b | I.1.2.1 | I.2 | I.2 | 131 | KC750152 | duck                       | China       | GD_SZ               | 2008 |
| I_b | I.1.2.1 | I.2 | I.2 | 132 | KC894391 | mallard                    | China       | Jilin               | 2011 |
| I_b | I.1.2.1 | I.2 | I.2 | 133 | KF851269 | teal                       | Ukraine     | Krasnooskiisky_5_11 | 2009 |
| I_b | I.1.2.1 | I.2 | I.2 | 134 | KF851270 | Ruddy_Shelduck             | Ukraine     | AN_371502_11        | 2011 |
| I_b | I.1.2.1 | I.2 | I.2 | 135 | KJ920203 | mallard                    | Japan       | Yakutiya_852        | 2011 |
| I_b | I.1.2.1 | I.2 | I.2 | 136 | KM885166 | duck                       | China       | LAH_224             | 2011 |

|     |         |     |     |      |            |                  |             |                        |      |
|-----|---------|-----|-----|------|------------|------------------|-------------|------------------------|------|
| I_b | I.1.2.1 | I.2 | I.2 | 137  | KR869090   | chicken          | China       | GX21                   | 2013 |
| I_b | I.1.2.1 | I.2 | I.2 | 138  | KT186351   | domestic_duck    | South_Korea | DK13                   | 2007 |
| I_b | I.1.2.1 | I.2 | I.2 | 139  | KT380032   | chicken          | South_Korea | NDRL0901               | 2010 |
| I_b | I.1.2.1 | I.2 | I.2 | 140  | KT381598   | duck             | China       | Guangdong_GM12         | 2014 |
| I_b | I.1.2.1 | I.2 | I.2 | 141  | KT381599   | duck             | China       | Guangdong_GZ331        | 2014 |
| I_b | I.1.2.1 | I.2 | I.2 | 142  | KT892753   | swan_goose       | China       | JL_CC02                | 2013 |
| I_b | I.1.2.1 | I.2 | I.2 | 143  | KT892754   | hooded_crane     | China       | JL_BC01                | 2015 |
| I_b | I.1.2.1 | I.2 | I.2 | 144  | KT892755   | hooded_crane     | China       | JL_BC02                | 2015 |
| I_b | I.1.2.1 | I.2 | I.2 | 145  | KU601398   | Common_murre     | Russia      | Tyuleny_Island_109     | 2015 |
| I_b | I.1.2.1 | I.2 | I.2 | 146  | KU662357   | Wild_Garganey    | Russia      | Novosibirsk_27         | 2014 |
| I_b | I.1.2.1 | I.2 | I.2 | 147  | KX352836   | teal             | Russia      | Novosibirsk_region_320 | 2010 |
| I_b | I.1.2.1 | I.2 | I.2 | 148  | KX857698   | Blue_winged_teal | TX_USA      | AI12_3663              | 2012 |
| I_b | I.1.2.1 | I.2 | I.2 | 149  | KX857699   | Mallard          | MN_USA      | AI12_4078              | 2012 |
| I_b | I.1.2.1 | I.2 | I.2 | 150  | KX857700   | Blue_winged_teal | TX_USA      | AI12_4395              | 2012 |
| I_b | I.1.2.1 | I.2 | I.2 | 151  | KX857701   | Blue_winged_teal | LA_USA      | AI12_4416              | 2012 |
| I_b | I.1.2.1 | I.2 | I.2 | 153  | KX857703   | Mallard          | MN_USA      | AI12_4716              | 2012 |
| I_b | I.1.2.1 | I.2 | I.2 | 154  | KX857704   | Mallard          | MN_USA      | AI12_4867              | 2012 |
| I_b | I.1.2.1 | I.2 | I.2 | 155  | KX857705   | Mallard          | MN_USA      | AI13_3228              | 2013 |
| I_b | I.1.2.1 | I.2 | I.2 | 156  | KX857706   | Blue_winged_teal | TX_USA      | AI13_4119              | 2013 |
| I_b | I.1.2.1 | I.2 | I.2 | 157  | KX857707   | Mallard          | MN_USA      | AI13_4403              | 2013 |
| I_b | I.1.2.1 | I.2 | I.2 | 158  | KX857708   | Mallard          | MN_USA      | AI14_3310              | 2014 |
| I_b | I.1.2.1 | I.2 | I.2 | 159  | KX857709   | Mallard          | MN_USA      | AI14_3452              | 2014 |
| I_b | I.1.2.1 | I.2 | I.2 | 160  | KX857710   | Blue_winged_teal | TX_USA      | AI14_3711              | 2014 |
| I_b | I.1.2.1 | I.2 | I.2 | 182  | AY562991   | chicken          | Ireland     | Ulster                 | 1967 |
| I_b | I.1.2.1 | I.2 | I.2 | 2064 | KX765175.1 | duck             | China       | LH11740                | 2013 |
| I_b | I.1.2.1 | I.2 | I.2 | 2065 | KX765176.1 | duck             | China       | MH331_7                | 2011 |
| I_b | I.1.2.1 | I.2 | I.2 | 2333 | MH675922.1 | duck             | China       | D4                     | 2016 |
| I_b | I.1.2.1 | I.2 | I.2 | 2516 | MH289831.1 | duck             | China       | JX_75C2                | 2016 |
| I_b | I.1.2.1 | I.2 | I.2 | 2517 | MH289832.1 | duck             | China       | JX_2N                  | 2016 |
| I_b | I.1.2.1 | I.2 | I.2 | 2518 | MH289833.1 | duck             | China       | JX_77C2                | 2016 |
| I_b | I.1.2.1 | I.2 | I.2 | 2520 | MH289835.1 | Anser_fabalis    | China       | HN_F2_110_1            | 2016 |
| II  | II      | II  | II  | 355  | EU289028   | turkey           | USA         | VG_GA                  | 1989 |
| II  | II      | II  | II  | 372  | AF077761   | chicken          | USA         | Lasota                 | 1946 |
| II  | II      | II  | II  | 375  | GU978777   | chicken          | USA         | TX_GB                  | 1948 |

|     |     |     |     |      |            |         |           |                           |           |
|-----|-----|-----|-----|------|------------|---------|-----------|---------------------------|-----------|
| II  | II  | II  | II  | 376  | JN863121   | chicken | USA       | New_Jersey_Roakin         | 1948      |
| II  | II  | II  | II  | 377  | JN872151   | chicken | USA       | Hitchner_B1               | 1947      |
| II  | II  | II  | II  | 387  | KP939087   |         | Mexico    | Texcoco_H1_               | 1950      |
| II  | II  | II  | II  | 388  | KP939088   | chicken | USA       | California_CG_179_H4_     | 1946      |
| II  | II  | II  | II  | 389  | KP939089   | chicken | USA       | California_11914_FD_H6_   | 1944      |
| II  | II  | II  | II  | 390  | KP939090   | chicken | USA       | California_119144_NAP_H7_ | 1944      |
| II  | II  | II  | II  | 391  | KP939091   | _       | USA       | Ky_50                     | 1947      |
| II  | II  | II  | II  | 392  | KP939092   |         | USA       | Ohio_Miller               | 1948      |
| II  | II  | II  | II  | 393  | KP939093   |         | USA       | Montana                   | 1946      |
| II  | II  | II  | II  | 394  | KP939094   |         | USA       | Nebraska_WW1              | 1955      |
| II  | II  | II  | II  | 395  | KP939095   | _       | USA       | Ontario_Berwick           | 1948      |
| II  | II  | II  | II  | 396  | KP939096   | _       | USA       | NJ_KD                     | 1945      |
| II  | II  | II  | II  | 399  | KT445901   | chicken | Palestine | Komarov                   | 1945      |
| II  | II  | II  | II  | 426  | X04719     | chicken | USA       | Beaudette_C               | 1945      |
| III | III | III | III | 428  | EF201805   | avian   |           | Mukteswar                 | 1940      |
| III | III | III | III | 432  | DQ485259   | chicken | china     | Guangxi5                  | 2000      |
| III | III | III | III | 438  | GU182327   | chicken | Pakistan  | SPVC_Karachi_1            | 1974      |
| III | IX  | III | III | 1668 | M24700     | _       | Australia |                           | 1932      |
| III | IX  | III | III | 1669 | M24701     | chicken | Japan     | MIY_51                    | 1951      |
| III | III | III | III | 1985 | MH996904   | pigeon  | Bulgaria  | Novo_Selo_1161            | 1995      |
| IV  | IV  | IV  | IV  | 444  | AY741404   | Fowl    | UK        | Herts                     | 1933      |
| IV  | IV  | IV  | IV  | 445  | EU293914   | _       | Italy     | Italien                   | 1944      |
| IV  | IV  | IV  | IV  | 448  | MH996898   | chicken | Nigeria   | Plateau_1973_N53_         | 1973      |
| IV  | IV  | IV  | IV  | 1969 | MH092820   | duck    | Nigeria   | Vom_1980_N55_             | 1980      |
| IV  | IV  | IV  | IV  | 1977 | MH996897   | chicken | Nigeria   | Kano_N52_899              | 1973      |
| IV  | IV  | IV  | IV  | 1978 | MH996899   | chicken | Nigeria   | FLD_N54_901               | 1973      |
| IV  | IV  | IV  | IV  | 1979 | MH996900   | pullet  | Bulgaria  | Plovdiv_1153              | 1959      |
| IV  | IV  | IV  | IV  | 2395 | MH996952   | chicken | Nigeria   | Ibadan_VRD_Ibadan_2       | 1973      |
| IX  | IX  | IX  | IX  | 1630 | AF458009   | chicken | China     | FJ_1                      | 1985      |
| IX  | IX  | IX  | IX  | 1638 | FJ436303   | chicken | China     | ZJ_1                      | 1986      |
| IX  | IX  | IX  | IX  | 1640 | FJ436305   | chicken | China     | JS_1                      | 1997      |
| IX  | IX  | IX  | IX  | 1661 | AY508514   | chicken | China     | F48E9                     | 1948      |
| IX  | IX  | IX  | IX  | 1663 | FJ436302   | chicken | China     | F48E8                     | 1946_1948 |
| IX  | IX  | IX  | IX  | 1995 | MF278924.1 | chicken | China     | FS_SS_N                   | 1997      |

|      |       |       |       |      |            |                     |               |                                   |      |
|------|-------|-------|-------|------|------------|---------------------|---------------|-----------------------------------|------|
| UNCL | UNCL1 | UNCL1 | UNCL1 | 1968 | KT987209   | chicken             | India         | TPT_2_AP                          | 2012 |
| UNCL | UNCL2 | UNCL2 | UNCL2 | 1971 | GU187941   | chicken             | India         | Namakkal_Tamil_Nadu               | 1987 |
| UNCL | UNCL3 | UNCL3 | UNCL3 | 1972 | HQ011508   | peacock             | India         | 2K36_Chennai                      | 2008 |
| UNCL | UNCL4 | UNCL4 | UNCL4 | 1973 | KM056353   | chicken             | India         | 55_TN_Namakkal                    | _    |
| VI   | UNCL5 | UNCL5 | UNCL5 | 561  | JN872153   | chicken             | USA           | California_1083_Fontana_ancetsral | 1971 |
| VI_c | XX    | UNCL6 | UNCL6 | 680  | AB853926   | chicken             | Japan         | Osaka_2440_ancetsral              | 1969 |
| VI_c | XX    | UNCL7 | UNCL7 | 681  | Z12111     | chicken             | Great_Britain | Warwick_ancestral                 | 1966 |
| UNCL | UNCL8 | UNCL8 | UNCL8 | 1963 | JX393313   | mosquito_pool       | Indonesia     | JKT1997_ancetsral                 | 1997 |
| V_b  | V.2   | V     | V     | 520  | AY562990   | Psittacine          | USA           | Largo                             | 1971 |
| V_b  | V.2   | V     | V     | 521  | JN872155   | _                   | USA           | Tenn_74_2445_                     | 1974 |
| V_b  | V.2   | V     | V     | 522  | JN967789   | psittacine          | USA           | Indiana_29120                     | 1980 |
| V_b  | V.2   | V     | V     | 1982 | MH996901   | chicken             | Bulgaria      | ElovDol_1156                      | 1981 |
| V_b  | V.2   | V     | V     | 1983 | MH996902   | pigeon              | Bulgaria      | Septemvritsi_1157                 | 1982 |
| V_b  | V.2   | V     | V     | 1984 | MH996903   | chicken             | Bulgaria      | Furen_1159                        | 1988 |
| V_b  | V.2   | V     | V     | 526  | KF767470   | blue_fronted_parrot | Argentina     | 12567                             | 1976 |
| V_b  | V.2   | V     | V     | 527  | KJ123642   | chicken             | Brazil        | SJM_75                            | 1975 |
| V_d  | V     | V     | V     | 551  | HG937571   | chicken             | Uganda        | MU013                             | 2011 |
| V_d  | V     | V     | V     | 552  | HG937572   | chicken             | Uganda        | MU019                             | 2011 |
| V_d  | V     | V     | V     | 553  | HG937573   | chicken             | Uganda        | MU024                             | 2011 |
| V_d  | V     | V     | V     | 554  | HG937580   | chicken             | Uganda        | MU040                             | 2011 |
| V_d  | V     | V     | V     | 555  | JQ217418   | chicken             | Kenya         | A89                               | 2010 |
| V_d  | V     | V     | V     | 2146 | MG988405.1 | chicken             | Kenya         | KE1007                            | 2016 |
| V_b  | V.1   | V.1   | V.1   | 505  | AY288999   | chicken             | Mexico        | 37821                             | 1996 |
| V_b  | V.1   | V.1   | V.1   | 506  | AY562987   | gamefowl            | USA           | CA_211472                         | 2002 |
| V_b  | V.1   | V.1   | V.1   | 507  | EF520718   | gamefowl            | USA_          | CA_212676                         | 2002 |
| V_b  | V.1   | V.1   | V.1   | 508  | EU518677   | chicken             | Mexico        | Torreon_453                       | 2000 |
| V_b  | V.1   | V.1   | V.1   | 509  | EU518680   | chicken             | Mexico        | 458                               | 1988 |
| V_b  | V.1   | V.1   | V.1   | 510  | EU518681   | chicken             | Mexico        | 459                               | 2000 |
| V_b  | V.1   | V.1   | V.1   | 511  | JN872189   | parrot              | USA           | Colorado_8278                     | 1982 |
| V_b  | V.1   | V.1   | V.1   | 512  | JN872192   | chicken             | USA           | California_211472_4_              | 2002 |
| V_b  | V.1   | V.1   | V.1   | 513  | JN872194   | chicken             | Honduras      | 498109_15_                        | 2007 |
| V_b  | V.1   | V.1   | V.1   | 514  | JN942028   | chicken             | Mexico        | 51735_8_                          | 2000 |
| V_b  | V.1   | V.1   | V.1   | 515  | JN942032   | Amazon_parrot       | USA           | Missouri_31378                    | 1996 |
| V_b  | V.1   | V.1   | V.1   | 516  | JN942039   | Amazon_parrot       | USA           | California_28936                  | 1988 |

|      |        |        |        |      |            |               |                |                      |      |
|------|--------|--------|--------|------|------------|---------------|----------------|----------------------|------|
| V_b  | V.1    | V.1    | V.1    | 517  | JN942040   | parrot        | USA            | New_Jersey_19674_2   | 1986 |
| V_b  | V.1    | V.1    | V.1    | 518  | JN942042   | Amazon_parrot | USA            | California_16365     | 1981 |
| V_b  | V.1    | V.1    | V.1    | 519  | JN942045   | turkey        | Belize         | 4438_4               | 2008 |
| V_b  | V.1    | V.1    | V.1    | 528  | AY288993   | chicken       | Honduras       | 15                   | 2000 |
| V_b  | V.1    | V.1    | V.1    | 529  | JN872181   | chicken       | Honduras       | 44813                | 2000 |
| V_b  | V.1    | V.1    | V.1    | 530  | JN942027   | fighting_cock | Nicaragua      | 95066_9_             | 2001 |
| V_c  | V.2    | V.2    | V.2    | 532  | EU518682   | Dove          | Mexico         | Distrito_Federal_462 | 2004 |
| V_c  | V.2    | V.2    | V.2    | 533  | EU518683   | chicken       | Mexico         | Estado_de_Mexico_465 | 2005 |
| V_c  | V.2    | V.2    | V.2    | 534  | EU518684   | chicken       | Mexico         | Estado_de_Mexico_466 | 2006 |
| V_c  | V.2    | V.2    | V.2    | 535  | HM117720   | chicken       | Mexico_Puebla_ | NDV_P05              | 2005 |
| V_c  | V.2    | V.2    | V.2    | 536  | JQ697743   | chicken       | Mexico         | MX_NC02_634          | 2010 |
| V_c  | V.2    | V.2    | V.2    | 537  | JQ697744   | chicken       | Mexico         | MX_NC04_635          | 2010 |
| V_c  | V.2    | V.2    | V.2    | 538  | JX974435   | chicken       | Mexico         |                      | 2010 |
| V_c  | V.2    | V.2    | V.2    | 539  | KC808508   | gamefowl      | Mexico         | 616                  | 2008 |
| V_c  | V.2    | V.2    | V.2    | 540  | KC808509   | gamefowl      | Mexico         | DF_619               | 2008 |
| V_c  | V.2    | V.2    | V.2    | 541  | KC808510   | scarlet_macaw | Mexico         | Chiapas_672_ZM12     | 2009 |
| V_c  | V.2    | V.2    | V.2    | 542  | KC808512   | quail         | Mexico         | 615                  | 2009 |
| V_c  | V.2    | V.2    | V.2    | 543  | KF910963   | chicken       | Mexico         | M08_3313             | 2008 |
| V_c  | V.2    | V.2    | V.2    | 544  | KJ577136   | chicken       | Mexico         | Chimalhuacan         | 1973 |
| V_c  | V.2    | V.2    | V.2    | 545  | KY284094   | chicken       | Mexico         | 14_364_14_377        | 2014 |
| V_c  | V.2    | V.2    | V.2    | 2320 | MH392218   | chicken       | Mexico         | NC_23_686            | 2011 |
| VI_b | VI.1.1 | VI.1   | VI.1   | 657  | AF109885   | domestic_fowl | Great_Britain  | GB1168               | 1984 |
| VI_b | VI.1.1 | VI.1   | VI.1   | 658  | AJ880277   | pigeon        | Italy          | IT_227               | 1982 |
| VI_b | VI.1.1 | VI.1   | VI.1   | 659  | AY734535   | pigeon        | Argentina      | Tigre_6              | 1999 |
| VI_b | VI.1.1 | VI.1   | VI.1   | 660  | EF520716   | pigeon        | USA            | NY_US                | 1984 |
| VI_b | VI.1.1 | VI.1   | VI.1   | 661  | FJ410145   | pigeon        | USA            | New_York             | 1984 |
| VI_b | VI.1.1 | VI.1   | VI.1   | 662  | FJ410147   | pigeon        | USA            | Maryland             | 1984 |
| VI_b | VI.1.1 | VI.1   | VI.1   | 663  | FJ865434   | pigeon        | China          | S_1                  | 2002 |
| VI_b | VI.1.1 | VI.1   | VI.1   | 664  | JN872173   | pigeon        | USA            | New_York_44407       | 2007 |
| VI_b | VI.1.1 | VI.1   | VI.1   | 665  | JN967787   | pigeon        | USA            | Illinois_37397       | 1987 |
| VI_b | VI.1.1 | VI.1   | VI.1   | 666  | JN967788   | pigeon        | USA            | Maryland_11936       | 1985 |
| VI_b | VI.1.1 | VI.1   | VI.1   | 667  | KU377528   | Turtle_Dove   | Italy          | 00VIR4400            | 2000 |
| VI_b | VI.1.1 | VI.1   | VI.1   | 668  | KU377531   | pigeon        | Italy          | 06VIR463_2           | 2006 |
| VI   | VI.2.2 | VI.2.1 | VI.2.1 | 2188 | MH371057.1 | pigeon        | Israel         | PHL137866            | 2011 |

|      |          |                   |            |      |            |               |         |                         |      |
|------|----------|-------------------|------------|------|------------|---------------|---------|-------------------------|------|
| VI   | VI.2.2   | <b>VI.2.1</b>     | VI.2.1     | 2222 | MH371091.1 | pigeon        | Israel  | PHL133813               | 2011 |
| VI   | VI.2.2   | <b>VI.2.1</b>     | VI.2.1     | 2235 | MH377247.1 | pigeon        | Israel  | PHL37114.2              | 2008 |
| VI   | VI.2.2   | <b>VI.2.1</b>     | VI.2.1     | 2290 | MH377302.1 | loughing_dove | Israel  | PHL264752               | 2012 |
| VI   | VI.2.2.1 | <b>VI.2.1.1.1</b> | VI.2.1.1.1 | 556  | AY288995   | dove          | Italy   | 2736                    | 2000 |
| VI   | VI.2.2.1 | <b>VI.2.1.1.1</b> | VI.2.1.1.1 | 558  | GQ429292   | pigeon        | Ireland | AV324                   | 1996 |
| VI   | VI.2.2.1 | <b>VI.2.1.1.1</b> | VI.2.1.1.1 | 559  | GQ429293   | Dove          | Italy   | 2736                    | 2000 |
| VI   | VI.2.2.1 | <b>VI.2.1.1.1</b> | VI.2.1.1.1 | 562  | JN872183   | pigeon        | USA     | Maryland_2075           | 1998 |
| VI   | VI.2.2.1 | <b>VI.2.1.1.1</b> | VI.2.1.1.1 | 564  | KJ736742   | pigeon        | Germany | R75_98                  | 1998 |
| VI_a | VI.2.2.1 | <b>VI.2.1.1.1</b> | VI.2.1.1.1 | 577  | EU477189   | pigeon        | USA_RI_ | RI166                   | 2000 |
| VI_a | VI.2.2.1 | <b>VI.2.1.1.1</b> | VI.2.1.1.1 | 578  | JN872160   | pigeon        | USA     | Minnesota_511296        | 2007 |
| VI_a | VI.2.2.1 | <b>VI.2.1.1.1</b> | VI.2.1.1.1 | 579  | JN872167   | dove          | USA     | FL_455682_2_            | 2006 |
| VI_a | VI.2.2.1 | <b>VI.2.1.1.1</b> | VI.2.1.1.1 | 580  | JN872172   | raptor        | USA     | Minnesota_18575_4_      | 2009 |
| VI_a | VI.2.2.1 | <b>VI.2.1.1.1</b> | VI.2.1.1.1 | 581  | JN872174   | environment   | USA     | New_Jersey_9564_        | 2010 |
| VI_a | VI.2.2.1 | <b>VI.2.1.1.1</b> | VI.2.1.1.1 | 582  | JN872175   | pigeon        | USA     | Minnesota_723_          | 2009 |
| VI_a | VI.2.2.1 | <b>VI.2.1.1.1</b> | VI.2.1.1.1 | 583  | JN872176   | pheasant      | USA     | Massachusetts_359425_   | 2005 |
| VI_a | VI.2.2.1 | <b>VI.2.1.1.1</b> | VI.2.1.1.1 | 584  | JN872177   | chicken       | USA     | Massachusetts_344783_3_ | 2004 |
| VI_a | VI.2.2.1 | <b>VI.2.1.1.1</b> | VI.2.1.1.1 | 585  | JN872190   | pigeon        | USA     | South_Dakota_486839     | 2007 |
| VI_a | VI.2.2.1 | <b>VI.2.1.1.1</b> | VI.2.1.1.1 | 586  | JN941996   | pigeon        | USA     | Pennsylvania_2062_      | 2008 |
| VI_a | VI.2.2.1 | <b>VI.2.1.1.1</b> | VI.2.1.1.1 | 587  | JN941998   | pigeon        | USA     | Pennsylvania_2282       | 2008 |
| VI_a | VI.2.2.1 | <b>VI.2.1.1.1</b> | VI.2.1.1.1 | 588  | JN941999   | pigeon        | USA     | Minnesota_77_           | 2008 |
| VI_a | VI.2.2.1 | <b>VI.2.1.1.1</b> | VI.2.1.1.1 | 589  | JN942000   | dove          | USA     | Florida_1287_           | 2008 |
| VI_a | VI.2.2.1 | <b>VI.2.1.1.1</b> | VI.2.1.1.1 | 590  | JN942100   | chukar        | USA     | New_Jersey_32429_5      | 2000 |
| VI_a | VI.2.2.1 | <b>VI.2.1.1.1</b> | VI.2.1.1.1 | 591  | JX901304   | _             | USA     | 301                     | 2003 |
| VI_a | VI.2.2.1 | <b>VI.2.1.1.1</b> | VI.2.1.1.1 | 592  | JX901305   | _             | USA     | 302                     | 2003 |
| VI_a | VI.2.2.1 | <b>VI.2.1.1.1</b> | VI.2.1.1.1 | 593  | JX901313   | pigeon        | USA     | 102                     | 2001 |
| VI_a | VI.2.2.1 | <b>VI.2.1.1.1</b> | VI.2.1.1.1 | 594  | JX901314   | dove          | USA     | 103                     | 2001 |
| VI_a | VI.2.2.1 | <b>VI.2.1.1.1</b> | VI.2.1.1.1 | 595  | JX901317   | pigeon        | USA     | 201                     | 2002 |
| VI_a | VI.2.2.1 | <b>VI.2.1.1.1</b> | VI.2.1.1.1 | 596  | JX901319   | pigeon        | USA     | PA_0501                 | 2005 |
| VI_a | VI.2.2.1 | <b>VI.2.1.1.1</b> | VI.2.1.1.1 | 597  | JX901320   | pigeon        | USA     | PA_0502                 | 2005 |
| VI_a | VI.2.2.1 | <b>VI.2.1.1.1</b> | VI.2.1.1.1 | 598  | JX901321   | chicken       | USA     | PA_0503                 | 2005 |
| VI_a | VI.2.2.1 | <b>VI.2.1.1.1</b> | VI.2.1.1.1 | 599  | JX901323   | pigeon        | USA     | PA_0601                 | 2006 |
| VI_a | VI.2.2.1 | <b>VI.2.1.1.1</b> | VI.2.1.1.1 | 600  | JX901324   | pigeon        | USA     | PA_0602                 | 2006 |
| VI_a | VI.2.2.1 | <b>VI.2.1.1.1</b> | VI.2.1.1.1 | 601  | JX901325   | pigeon        | USA     | NY_0603                 | 2006 |
| VI_a | VI.2.2.1 | <b>VI.2.1.1.1</b> | VI.2.1.1.1 | 602  | JX901326   | pigeon        | USA     | NJ_0604                 | 2006 |



|      |          |                   |            |     |          |        |     |         |      |
|------|----------|-------------------|------------|-----|----------|--------|-----|---------|------|
| VI_a | VI.2.2.1 | <b>VI.2.1.1.1</b> | VI.2.1.1.1 | 603 | JX901327 | pigeon | USA | PA_0605 | 2006 |
| VI_a | VI.2.2.1 | <b>VI.2.1.1.1</b> | VI.2.1.1.1 | 604 | JX901328 | pigeon | USA | NJ_0607 | 2006 |
| VI_a | VI.2.2.1 | <b>VI.2.1.1.1</b> | VI.2.1.1.1 | 605 | JX901329 | pigeon | USA | PA_0701 | 2007 |
| VI_a | VI.2.2.1 | <b>VI.2.1.1.1</b> | VI.2.1.1.1 | 606 | JX901330 | pigeon | USA | PA_0702 | 2007 |
| VI_a | VI.2.2.1 | <b>VI.2.1.1.1</b> | VI.2.1.1.1 | 607 | JX901332 | pigeon | USA | MO_0703 | 2007 |
| VI_a | VI.2.2.1 | <b>VI.2.1.1.1</b> | VI.2.1.1.1 | 608 | JX901333 | pigeon | USA | PA_0704 | 2007 |
| VI_a | VI.2.2.1 | <b>VI.2.1.1.1</b> | VI.2.1.1.1 | 609 | JX901334 | pigeon | USA | PA_0705 | 2007 |
| VI_a | VI.2.2.1 | <b>VI.2.1.1.1</b> | VI.2.1.1.1 | 610 | JX901335 | pigeon | USA | PA_0706 | 2007 |
| VI_a | VI.2.2.1 | <b>VI.2.1.1.1</b> | VI.2.1.1.1 | 611 | JX901336 | pigeon | USA | NC_0707 | 2007 |
| VI_a | VI.2.2.1 | <b>VI.2.1.1.1</b> | VI.2.1.1.1 | 612 | JX901337 | pigeon | USA | CT_0708 | 2007 |
| VI_a | VI.2.2.1 | <b>VI.2.1.1.1</b> | VI.2.1.1.1 | 613 | JX901338 | pigeon | USA | OH_0709 | 2007 |
| VI_a | VI.2.2.1 | <b>VI.2.1.1.1</b> | VI.2.1.1.1 | 614 | JX901339 | pigeon | USA | NJ_0710 | 2007 |
| VI_a | VI.2.2.1 | <b>VI.2.1.1.1</b> | VI.2.1.1.1 | 615 | JX901340 | pigeon | USA | PA_0711 | 2007 |
| VI_a | VI.2.2.1 | <b>VI.2.1.1.1</b> | VI.2.1.1.1 | 616 | JX901344 | pigeon | USA | ME_0714 | 2007 |
| VI_a | VI.2.2.1 | <b>VI.2.1.1.1</b> | VI.2.1.1.1 | 617 | JX901346 | pigeon | USA | PA_0716 | 2007 |
| VI_a | VI.2.2.1 | <b>VI.2.1.1.1</b> | VI.2.1.1.1 | 618 | JX901347 | pigeon | USA | NY_0717 | 2007 |
| VI_a | VI.2.2.1 | <b>VI.2.1.1.1</b> | VI.2.1.1.1 | 619 | JX901348 | pigeon | USA | PA_0718 | 2007 |
| VI_a | VI.2.2.1 | <b>VI.2.1.1.1</b> | VI.2.1.1.1 | 620 | JX901349 | pigeon | USA | MD_0719 | 2007 |
| VI_a | VI.2.2.1 | <b>VI.2.1.1.1</b> | VI.2.1.1.1 | 621 | JX901350 | pigeon | USA | PA_0720 | 2007 |
| VI_a | VI.2.2.1 | <b>VI.2.1.1.1</b> | VI.2.1.1.1 | 622 | JX901351 | pigeon | USA | NJ_0721 | 2007 |
| VI_a | VI.2.2.1 | <b>VI.2.1.1.1</b> | VI.2.1.1.1 | 623 | JX901352 | pigeon | USA | PA_0723 | 2007 |
| VI_a | VI.2.2.1 | <b>VI.2.1.1.1</b> | VI.2.1.1.1 | 624 | JX901353 | pigeon | USA | PA_0724 | 2007 |
| VI_a | VI.2.2.1 | <b>VI.2.1.1.1</b> | VI.2.1.1.1 | 625 | JX901354 | pigeon | USA | PA_0725 | 2007 |
| VI_a | VI.2.2.1 | <b>VI.2.1.1.1</b> | VI.2.1.1.1 | 626 | JX901355 | pigeon | USA | PA_0726 | 2007 |
| VI_a | VI.2.2.1 | <b>VI.2.1.1.1</b> | VI.2.1.1.1 | 627 | JX901356 | pigeon | USA | PA_0727 | 2007 |
| VI_a | VI.2.2.1 | <b>VI.2.1.1.1</b> | VI.2.1.1.1 | 628 | JX901357 | pigeon | USA | PA_0728 | 2007 |
| VI_a | VI.2.2.1 | <b>VI.2.1.1.1</b> | VI.2.1.1.1 | 629 | JX901358 | pigeon | USA | PA_0801 | 2008 |
| VI_a | VI.2.2.1 | <b>VI.2.1.1.1</b> | VI.2.1.1.1 | 630 | JX901359 | pigeon | USA | PA_0802 | 2008 |
| VI_a | VI.2.2.1 | <b>VI.2.1.1.1</b> | VI.2.1.1.1 | 631 | JX901360 | pigeon | USA | PA_0803 | 2008 |
| VI_a | VI.2.2.1 | <b>VI.2.1.1.1</b> | VI.2.1.1.1 | 632 | JX901361 | pigeon | USA | PA_0804 | 2008 |
| VI_a | VI.2.2.1 | <b>VI.2.1.1.1</b> | VI.2.1.1.1 | 633 | JX901362 | pigeon | USA | PA_0805 | 2008 |
| VI_a | VI.2.2.1 | <b>VI.2.1.1.1</b> | VI.2.1.1.1 | 634 | JX901363 | pigeon | USA | PA_0806 | 2008 |
| VI_a | VI.2.2.1 | <b>VI.2.1.1.1</b> | VI.2.1.1.1 | 635 | JX901364 | pigeon | USA | PA_0807 | 2008 |
| VI_a | VI.2.2.1 | <b>VI.2.1.1.1</b> | VI.2.1.1.1 | 636 | JX901365 | pigeon | USA | PA_0808 | 2008 |

|      |          |                   |            |     |          |                        |            |                        |      |
|------|----------|-------------------|------------|-----|----------|------------------------|------------|------------------------|------|
| VI_a | VI.2.2.1 | <b>VI.2.1.1.1</b> | VI.2.1.1.1 | 637 | JX901366 | pigeon                 | USA        | PA_0809                | 2008 |
| VI_a | VI.2.2.1 | <b>VI.2.1.1.1</b> | VI.2.1.1.1 | 638 | JX901367 | pigeon                 | USA        | PA_0810                | 2008 |
| VI_a | VI.2.2.1 | <b>VI.2.1.1.1</b> | VI.2.1.1.1 | 639 | JX901368 | pigeon                 | USA        | PA_0811                | 2008 |
| VI_a | VI.2.2.1 | <b>VI.2.1.1.1</b> | VI.2.1.1.1 | 640 | JX901369 | pigeon                 | USA        | NJ_0812                | 2008 |
| VI_a | VI.2.2.1 | <b>VI.2.1.1.1</b> | VI.2.1.1.1 | 641 | JX901373 | pigeon                 | USA        | PA_0902                | 2009 |
| VI_a | VI.2.2.1 | <b>VI.2.1.1.1</b> | VI.2.1.1.1 | 642 | JX901374 | pigeon                 | USA        | OH_0903                | 2009 |
| VI_a | VI.2.2.1 | <b>VI.2.1.1.1</b> | VI.2.1.1.1 | 643 | JX901375 | pigeon                 | USA        | PA_0904                | 2009 |
| VI_a | VI.2.2.1 | <b>VI.2.1.1.1</b> | VI.2.1.1.1 | 644 | JX901376 | pigeon                 | USA        | PA_0905                | 2009 |
| VI_a | VI.2.2.1 | <b>VI.2.1.1.1</b> | VI.2.1.1.1 | 645 | JX901377 | pigeon                 | USA        | PA_0906                | 2009 |
| VI_a | VI.2.2.1 | <b>VI.2.1.1.1</b> | VI.2.1.1.1 | 646 | KP780870 | Rock_pigeon            | USA        | MD_ND0002270           | 2013 |
| VI_a | VI.2.2.1 | <b>VI.2.1.1.1</b> | VI.2.1.1.1 | 647 | KP780871 | Rock_pigeon            | USA        | Allegheny_PA_ND0007190 | 2013 |
| VI_a | VI.2.2.1 | <b>VI.2.1.1.1</b> | VI.2.1.1.1 | 648 | KP780872 | Rock_pigeon            | USA        | Allegheny_PA_ND0007186 | 2013 |
| VI_a | VI.2.2.1 | <b>VI.2.1.1.1</b> | VI.2.1.1.1 | 649 | KP780873 | Rock_pigeon            | USA        | Allegheny_PA_ND0007187 | 2013 |
| VI_a | VI.2.2.1 | <b>VI.2.1.1.1</b> | VI.2.1.1.1 | 650 | KP780874 | Rock_pigeon            | USA        | Allegheny_PA_ND0007199 | 2013 |
| VI_a | VI.2.2.1 | <b>VI.2.1.1.1</b> | VI.2.1.1.1 | 651 | KP780875 | Rock_pigeon            | USA        | Ingham_MI_ND0003553    | 2013 |
| VI_a | VI.2.2.1 | <b>VI.2.1.1.1</b> | VI.2.1.1.1 | 652 | KP780876 | Rock_pigeon            | USA        | Ingham_MI_ND0003558    | 2013 |
| VI_a | VI.2.2.1 | <b>VI.2.1.1.1</b> | VI.2.1.1.1 | 653 | KU059752 | Eurasian_collared_dove | USA_TX_    | TX3988                 | 2004 |
| VI_a | VI.2.2.1 | <b>VI.2.1.1.1</b> | VI.2.1.1.1 | 654 | MG018201 | RODO                   | USA_MA     | 1188_kidney_24998_1G   | 2014 |
| VI_a | VI.2.2.1 | <b>VI.2.1.1.1</b> | VI.2.1.1.1 | 655 | MG018202 | ECDO                   | USA_MT     | 1177_kidney_22919_1_B  | 2010 |
| VI_a | VI.2.2.1 | <b>VI.2.1.1.1</b> | VI.2.1.1.1 | 656 | MG018218 | RODO                   | USA_PA     | 1189_kidney_23844_3_C  | 2012 |
| VI_n | VI.2.2.1 | <b>VI.2.1.1.1</b> | VI.2.1.1.1 | 892 | EU477188 | Dove                   | USA_Texas_ | TX_B_2580              | 2004 |
| VI_n | VI.2.2.1 | <b>VI.2.1.1.1</b> | VI.2.1.1.1 | 893 | EU477190 | pigeon                 | USA_Texas_ | TX3503                 | 2004 |
| VI_n | VI.2.2.1 | <b>VI.2.1.1.1</b> | VI.2.1.1.1 | 894 | EU477191 | Eurasian_collared_dove | USA_Texas_ | TX3988                 | 2005 |
| VI_n | VI.2.2.1 | <b>VI.2.1.1.1</b> | VI.2.1.1.1 | 895 | EU477192 | Eurasian_collared_dove | USA_Texas_ | TX4156                 | 2005 |
| VI_n | VI.2.2.1 | <b>VI.2.1.1.1</b> | VI.2.1.1.1 | 896 | EU477195 | Eurasian_collared_dove | USA        | TX6295                 | 2006 |
| VI_n | VI.2.2.1 | <b>VI.2.1.1.1</b> | VI.2.1.1.1 | 897 | JN872170 | pigeon                 | USA        | Texas_5254_12          | 2010 |
| VI_n | VI.2.2.1 | <b>VI.2.1.1.1</b> | VI.2.1.1.1 | 898 | JN872178 | turkey                 | USA        | Louisiana_331309_      | 2004 |
| VI_n | VI.2.2.1 | <b>VI.2.1.1.1</b> | VI.2.1.1.1 | 899 | JN872179 | pigeon                 | USA        | Nevada_241851_         | 2003 |
| VI_n | VI.2.2.1 | <b>VI.2.1.1.1</b> | VI.2.1.1.1 | 900 | JX901342 | pigeon                 | USA        | MN_0713                | 2007 |
| VI_n | VI.2.2.1 | <b>VI.2.1.1.1</b> | VI.2.1.1.1 | 901 | MG018205 | ECDO                   | USA_TX     | 1179_kidney_26041_3_C  | 2014 |
| VI_n | VI.2.2.1 | <b>VI.2.1.1.1</b> | VI.2.1.1.1 | 902 | MG018206 | ECDO                   | USA_TX     | 1180_kidney_26041_4_C  | 2014 |
| VI_n | VI.2.2.1 | <b>VI.2.1.1.1</b> | VI.2.1.1.1 | 903 | MG018208 | ECDO                   | USA_UT     | 1181_spleen_26594_1_A  | 2015 |
| VI_n | VI.2.2.1 | <b>VI.2.1.1.1</b> | VI.2.1.1.1 | 904 | MG018209 | ECDO                   | USA_TX     | 1182_spleen_26877_2_C  | 2016 |
| VI_n | VI.2.2.1 | <b>VI.2.1.1.1</b> | VI.2.1.1.1 | 905 | MG018210 | ECDO                   | USA_TX     | 1184_kidney_26981_2_C  | 2015 |

|      |            |                     |              |     |          |                          |                  |                       |      |
|------|------------|---------------------|--------------|-----|----------|--------------------------|------------------|-----------------------|------|
| VI_n | VI.2.2.1   | <b>VI.2.1.1.1</b>   | VI.2.1.1.1   | 906 | MG018211 | ECDO                     | USA_TX           | 1185_kidney_26981_3_A | 2015 |
| VI_n | VI.2.2.1   | <b>VI.2.1.1.1</b>   | VI.2.1.1.1   | 907 | MG018213 | ECDO                     | USA_KS           | 1191_spleen_W16_453_3 | 2016 |
| VI_j | VI.2.2.2.1 | <b>VI.2.1.1.2.1</b> | VI.2.1.1.2.1 | 563 | KJ600777 | pigeon                   | China            | SD_132                | 2012 |
| VI_j | VI.2.2.2.1 | <b>VI.2.1.1.2.1</b> | VI.2.1.1.2.1 | 786 | AY288996 | pigeon                   | Italy            | 1166                  | 2000 |
| VI_j | VI.2.2.2.1 | <b>VI.2.1.1.2.1</b> | VI.2.1.1.2.1 | 787 | FJ766527 | pigeon                   | China            | JS_16                 | 2007 |
| VI_j | VI.2.2.2.1 | <b>VI.2.1.1.2.1</b> | VI.2.1.1.2.1 | 788 | GQ281085 | pigeon                   | China            | JS_35                 | 2007 |
| VI_j | VI.2.2.2.1 | <b>VI.2.1.1.2.1</b> | VI.2.1.1.2.1 | 789 | GQ281086 | pigeon                   | China            | WX_10                 | 2007 |
| VI_j | VI.2.2.2.1 | <b>VI.2.1.1.2.1</b> | VI.2.1.1.2.1 | 790 | GQ281087 | pigeon                   | China            | YZ_21                 | 2007 |
| VI_j | VI.2.2.2.1 | <b>VI.2.1.1.2.1</b> | VI.2.1.1.2.1 | 791 | GQ281088 | pigeon                   | China            | YZ_23                 | 2007 |
| VI_j | VI.2.2.2.1 | <b>VI.2.1.1.2.1</b> | VI.2.1.1.2.1 | 792 | GU551934 | carrier_pigeon           | China            | carrier_Guandong      | 2008 |
| VI_j | VI.2.2.2.1 | <b>VI.2.1.1.2.1</b> | VI.2.1.1.2.1 | 793 | HE972209 | pigeon                   | Luxemburg        | 119                   | 2006 |
| VI_j | VI.2.2.2.1 | <b>VI.2.1.1.2.1</b> | VI.2.1.1.2.1 | 794 | HE972212 | pigeon                   | Luxemburg        | 3821_1                | 2007 |
| VI_j | VI.2.2.2.1 | <b>VI.2.1.1.2.1</b> | VI.2.1.1.2.1 | 795 | HM063423 | whitebreasted_water_hen_ | China_Guangdong_ | W4                    | 2005 |
| VI_j | VI.2.2.2.1 | <b>VI.2.1.1.2.1</b> | VI.2.1.1.2.1 | 796 | HM063425 | wild_pigeon              | China_Guangdong_ | P4                    | 2003 |
| VI_j | VI.2.2.2.1 | <b>VI.2.1.1.2.1</b> | VI.2.1.1.2.1 | 797 | HM625835 | duck                     | China            | SS                    | 2008 |
| VI_j | VI.2.2.2.1 | <b>VI.2.1.1.2.1</b> | VI.2.1.1.2.1 | 798 | HM748948 | chicken                  | China            | SD5                   | 2008 |
| VI_j | VI.2.2.2.1 | <b>VI.2.1.1.2.1</b> | VI.2.1.1.2.1 | 799 | JF713701 | pigeon                   | China            | SD10                  | 2010 |
| VI_j | VI.2.2.2.1 | <b>VI.2.1.1.2.1</b> | VI.2.1.1.2.1 | 800 | JN941995 | pigeon                   | USA              | New_York_1989_19_     | 2008 |
| VI_j | VI.2.2.2.1 | <b>VI.2.1.1.2.1</b> | VI.2.1.1.2.1 | 802 | JN986839 | pigeon                   | Ireland          | 806                   | 2004 |
| VI_j | VI.2.2.2.1 | <b>VI.2.1.1.2.1</b> | VI.2.1.1.2.1 | 803 | JQ268609 | pigeon                   | China            | Miangyang12505        | 2011 |
| VI_j | VI.2.2.2.1 | <b>VI.2.1.1.2.1</b> | VI.2.1.1.2.1 | 804 | JX094510 | pigeon                   | China            | sms12                 | 2012 |
| VI_j | VI.2.2.2.1 | <b>VI.2.1.1.2.1</b> | VI.2.1.1.2.1 | 805 | JX244789 | pigeon                   | China            | JM_11                 | 2000 |
| VI_j | VI.2.2.2.1 | <b>VI.2.1.1.2.1</b> | VI.2.1.1.2.1 | 806 | JX244798 | pigeon                   | China            | 104                   | 2008 |
| VI_j | VI.2.2.2.1 | <b>VI.2.1.1.2.1</b> | VI.2.1.1.2.1 | 807 | JX244799 | pigeon                   | China            | 105                   | 2008 |
| VI_j | VI.2.2.2.1 | <b>VI.2.1.1.2.1</b> | VI.2.1.1.2.1 | 808 | JX244800 | pigeon                   | China            | 106                   | 2008 |
| VI_j | VI.2.2.2.1 | <b>VI.2.1.1.2.1</b> | VI.2.1.1.2.1 | 809 | JX486550 | pigeon                   | China            | LGD_110208            | 2011 |
| VI_j | VI.2.2.2.1 | <b>VI.2.1.1.2.1</b> | VI.2.1.1.2.1 | 810 | JX486551 | pigeon                   | China            | LJL_100605            | 2010 |
| VI_j | VI.2.2.2.1 | <b>VI.2.1.1.2.1</b> | VI.2.1.1.2.1 | 811 | JX486553 | pigeon                   | China            | LHLJ_110813           | 2011 |
| VI_j | VI.2.2.2.1 | <b>VI.2.1.1.2.1</b> | VI.2.1.1.2.1 | 812 | JX486554 | pigeon                   | China            | LHLJ_110822           | 2011 |
| VI_j | VI.2.2.2.1 | <b>VI.2.1.1.2.1</b> | VI.2.1.1.2.1 | 813 | JX486555 | pigeon                   | China            | LGD_110945            | 2011 |
| VI_j | VI.2.2.2.1 | <b>VI.2.1.1.2.1</b> | VI.2.1.1.2.1 | 814 | JX486557 | pigeon                   | China            | LJL_120404            | 2012 |
| VI_j | VI.2.2.2.1 | <b>VI.2.1.1.2.1</b> | VI.2.1.1.2.1 | 815 | JX901109 | pigeon                   | Belgium          | 238                   | 1998 |
| VI_j | VI.2.2.2.1 | <b>VI.2.1.1.2.1</b> | VI.2.1.1.2.1 | 816 | JX901110 | pigeon                   | Belgium          | 248                   | 1998 |
| VI_j | VI.2.2.2.1 | <b>VI.2.1.1.2.1</b> | VI.2.1.1.2.1 | 817 | JX901111 | pigeon                   | Belgium          | 321                   | 1998 |

|      |            |                     |              |      |            |             |         |                 |      |
|------|------------|---------------------|--------------|------|------------|-------------|---------|-----------------|------|
| VI_j | VI.2.2.2.1 | <b>VI.2.1.1.2.1</b> | VI.2.1.1.2.1 | 818  | JX901119   | pigeon      | Belgium | 1824            | 2005 |
| VI_j | VI.2.2.2.1 | <b>VI.2.1.1.2.1</b> | VI.2.1.1.2.1 | 819  | JX901121   | pigeon      | Belgium | 4943            | 2007 |
| VI_j | VI.2.2.2.1 | <b>VI.2.1.1.2.1</b> | VI.2.1.1.2.1 | 820  | KJ525672   | pigeon      | China   | SD_JN           | 2010 |
| VI_j | VI.2.2.2.1 | <b>VI.2.1.1.2.1</b> | VI.2.1.1.2.1 | 821  | KM374059   | pigeon      | China   | Guangxi_1015    | 2013 |
| VI_j | VI.2.2.2.1 | <b>VI.2.1.1.2.1</b> | VI.2.1.1.2.1 | 822  | KT381595   | pigeon      | China   | Guangdong_GM1   | 2014 |
| VI_j | VI.2.2.2.1 | <b>VI.2.1.1.2.1</b> | VI.2.1.1.2.1 | 823  | KT381606   | pigeon      | China   | Guangdong_GZ289 | 2014 |
| VI_j | VI.2.2.2.1 | <b>VI.2.1.1.2.1</b> | VI.2.1.1.2.1 | 824  | KU377529   | Turtle_Dove | Italy   | 02VIR1875       | 2002 |
| VI_j | VI.2.2.2.1 | <b>VI.2.1.1.2.1</b> | VI.2.1.1.2.1 | 825  | KU377530   | Turtle_Dove | Italy   | 04VIR434        | 2004 |
| VI_j | VI.2.2.2.1 | <b>VI.2.1.1.2.1</b> | VI.2.1.1.2.1 | 826  | KU377532   | Turtle_Dove | Italy   | 08VIR24         | 2008 |
| VI_j | VI.2.2.2.1 | <b>VI.2.1.1.2.1</b> | VI.2.1.1.2.1 | 827  | KU377534   | pigeon      | Italy   | 11VIR5795       | 2011 |
| VI_j | VI.2.2.2.1 | <b>VI.2.1.1.2.1</b> | VI.2.1.1.2.1 | 828  | KU377537   | pigeon      | Italy   | 14VIR8258_2     | 2014 |
| VI_j | VI.2.2.2.1 | <b>VI.2.1.1.2.1</b> | VI.2.1.1.2.1 | 829  | KX247376   | pigeon      | China   | SX_01           | 2015 |
| VI_j | VI.2.2.2.1 | <b>VI.2.1.1.2.1</b> | VI.2.1.1.2.1 | 830  | KX761865   | pigeon      | China   | HB1103          | 2011 |
| VI_j | VI.2.2.2.1 | <b>VI.2.1.1.2.1</b> | VI.2.1.1.2.1 | 2056 | MF681716.1 | dove        | Namibia | 8636            | 2016 |
| VI_j | VI.2.2.2.1 | <b>VI.2.1.1.2.1</b> | VI.2.1.1.2.1 | 2057 | MF681715.1 | dove        | Namibia | 8199            | 2016 |
| VI_j | VI.2.2.2.1 | <b>VI.2.1.1.2.1</b> | VI.2.1.1.2.1 | 2059 | MF681713.1 | dove        | Namibia | 7808            | 2016 |
| VI_j | VI.2.2.2.1 | <b>VI.2.1.1.2.1</b> | VI.2.1.1.2.1 | 2060 | MF681712.1 | dove        | Namibia | 5072            | 2016 |
| VI_j | VI.2.2.2.1 | <b>VI.2.1.1.2.1</b> | VI.2.1.1.2.1 | 2061 | MF681711.1 | dove        | Namibia | 4533            | 2017 |
| VI_k | VI.2.2.2.2 | <b>VI.2.1.1.2.2</b> | VI.2.1.1.2.2 | 834  | JN872162   | rosella     | Belgium | 4940            | 2008 |
| VI_k | VI.2.2.2.2 | <b>VI.2.1.1.2.2</b> | VI.2.1.1.2.2 | 835  | JQ979176   | pigeon      | China   | SDLC            | 2011 |
| VI_k | VI.2.2.2.2 | <b>VI.2.1.1.2.2</b> | VI.2.1.1.2.2 | 836  | JQ993431   | pigeon      | China   | SDS             | 2011 |
| VI_k | VI.2.2.2.2 | <b>VI.2.1.1.2.2</b> | VI.2.1.1.2.2 | 837  | JX486552   | pigeon      | China   | LLN_110713      | 2011 |
| VI_k | VI.2.2.2.2 | <b>VI.2.1.1.2.2</b> | VI.2.1.1.2.2 | 838  | JX901120   | pigeon      | Belgium | 03936_8_        | 2005 |
| VI_k | VI.2.2.2.2 | <b>VI.2.1.1.2.2</b> | VI.2.1.1.2.2 | 839  | JX901122   | pigeon      | Belgium | 11_07574        | 2011 |
| VI_k | VI.2.2.2.2 | <b>VI.2.1.1.2.2</b> | VI.2.1.1.2.2 | 840  | JX901123   | pigeon      | Belgium | 11_08304        | 2011 |
| VI_k | VI.2.2.2.2 | <b>VI.2.1.1.2.2</b> | VI.2.1.1.2.2 | 841  | JX901124   | pigeon      | Belgium | 11_09620        | 2011 |
| VI_k | VI.2.2.2.2 | <b>VI.2.1.1.2.2</b> | VI.2.1.1.2.2 | 842  | KF828884.1 | pigeon      | China   | _BJP13          | 2013 |
| VI_k | VI.2.2.2.2 | <b>VI.2.1.1.2.2</b> | VI.2.1.1.2.2 | 843  | KJ607165   | pigeon      | China   | LHLJ_131237     | 2013 |
| VI_k | VI.2.2.2.2 | <b>VI.2.1.1.2.2</b> | VI.2.1.1.2.2 | 844  | KJ607166   | pigeon      | China   | LHLJ_131011     | 2013 |
| VI_k | VI.2.2.2.2 | <b>VI.2.1.1.2.2</b> | VI.2.1.1.2.2 | 845  | KJ782376   | pigeon      | China   | NM_0707         | 2011 |
| VI_k | VI.2.2.2.2 | <b>VI.2.1.1.2.2</b> | VI.2.1.1.2.2 | 846  | KJ808819   | pigeon      | China   | BJ2013          | 2013 |
| VI_k | VI.2.2.2.2 | <b>VI.2.1.1.2.2</b> | VI.2.1.1.2.2 | 847  | KM374056   | pigeon      | China   | Yunnan_1111     | 2013 |
| VI_k | VI.2.2.2.2 | <b>VI.2.1.1.2.2</b> | VI.2.1.1.2.2 | 848  | KM374057   | pigeon      | China   | Anhui_2365      | 2012 |
| VI_k | VI.2.2.2.2 | <b>VI.2.1.1.2.2</b> | VI.2.1.1.2.2 | 849  | KM374058   | pigeon      | China   | Anhui_2369      | 2012 |

|      |            |                     |              |      |             |                      |       |                 |      |
|------|------------|---------------------|--------------|------|-------------|----------------------|-------|-----------------|------|
| VI_k | VI.2.2.2.2 | <b>VI.2.1.1.2.2</b> | VI.2.1.1.2.2 | 850  | KM374060    | pigeon               | China | Shanghai_215    | 2011 |
| VI_k | VI.2.2.2.2 | <b>VI.2.1.1.2.2</b> | VI.2.1.1.2.2 | 851  | KM374061    | pigeon               | China | Zhejiang_2036   | 2012 |
| VI_k | VI.2.2.2.2 | <b>VI.2.1.1.2.2</b> | VI.2.1.1.2.2 | 852  | KP861633    | pigeon               | China | SD069           | 2012 |
| VI_k | VI.2.2.2.2 | <b>VI.2.1.1.2.2</b> | VI.2.1.1.2.2 | 853  | KT163262    | pigeon               | China | SH_0167         | 2013 |
| VI_k | VI.2.2.2.2 | <b>VI.2.1.1.2.2</b> | VI.2.1.1.2.2 | 854  | KT381592    | pigeon               | China | Guangdong_GZ293 | 2014 |
| VI_k | VI.2.2.2.2 | <b>VI.2.1.1.2.2</b> | VI.2.1.1.2.2 | 855  | KT381601    | pigeon               | China | Guangdong_GZ287 | 2013 |
| VI_k | VI.2.2.2.2 | <b>VI.2.1.1.2.2</b> | VI.2.1.1.2.2 | 856  | KT381602    | pigeon               | China | Guangdong_GZ288 | 2013 |
| VI_k | VI.2.2.2.2 | <b>VI.2.1.1.2.2</b> | VI.2.1.1.2.2 | 857  | KT381603    | pigeon               | China | Guangdong_GZ290 | 2013 |
| VI_k | VI.2.2.2.2 | <b>VI.2.1.1.2.2</b> | VI.2.1.1.2.2 | 858  | KT381604    | pigeon               | China | Guangdong_GZ292 | 2014 |
| VI_k | VI.2.2.2.2 | <b>VI.2.1.1.2.2</b> | VI.2.1.1.2.2 | 859  | KU522142    | pigeon               | Egypt | VRLCU           | 2014 |
| VI_k | VI.2.2.2.2 | <b>VI.2.1.1.2.2</b> | VI.2.1.1.2.2 | 860  | KU527559    | pigeon               | China | Jilin_DH09      | 2015 |
| VI_k | VI.2.2.2.2 | <b>VI.2.1.1.2.2</b> | VI.2.1.1.2.2 | 861  | KU527560    | pigeon               | China | Jilin_NG05      | 2015 |
| VI_k | VI.2.2.2.2 | <b>VI.2.1.1.2.2</b> | VI.2.1.1.2.2 | 862  | KX710210.1  | pigeon               | India | D168            | 2015 |
| VI_k | VI.2.2.2.2 | <b>VI.2.1.1.2.2</b> | VI.2.1.1.2.2 | 863  | KY788663.1. | Grey_heron           | China | GD_GZ333        | 2015 |
| VI_k | VI.2.2.2.2 | <b>VI.2.1.1.2.2</b> | VI.2.1.1.2.2 | 864  | KY788667.1. | European_turtle_dove | China | GD_GZ23         | 2015 |
| VI_k | VI.2.2.2.2 | <b>VI.2.1.1.2.2</b> | VI.2.1.1.2.2 | 2085 | MF580815.1  | pigeon               | China | GX0094          | 2011 |
| VI_k | VI.2.2.2.2 | <b>VI.2.1.1.2.2</b> | VI.2.1.1.2.2 | 2086 | MF580816.1  | pigeon               | China | GX0001          | 2012 |
| VI_k | VI.2.2.2.2 | <b>VI.2.1.1.2.2</b> | VI.2.1.1.2.2 | 2087 | MF580817.1  | pigeon               | China | GX0012          | 2012 |
| VI_k | VI.2.2.2.2 | <b>VI.2.1.1.2.2</b> | VI.2.1.1.2.2 | 2088 | MF580818.1  | pigeon               | China | GX0019          | 2012 |
| VI_k | VI.2.2.2.2 | <b>VI.2.1.1.2.2</b> | VI.2.1.1.2.2 | 2089 | MF580819.1  | pigeon               | China | GX0022          | 2012 |
| VI_k | VI.2.2.2.2 | <b>VI.2.1.1.2.2</b> | VI.2.1.1.2.2 | 2090 | MF580820.1  | pigeon               | China | GX0029          | 2012 |
| VI_k | VI.2.2.2.2 | <b>VI.2.1.1.2.2</b> | VI.2.1.1.2.2 | 2092 | MF580822.1  | pigeon               | China | GX0034          | 2012 |
| VI_k | VI.2.2.2.2 | <b>VI.2.1.1.2.2</b> | VI.2.1.1.2.2 | 2093 | MF580823.1  | pigeon               | China | GX0505          | 2012 |
| VI_k | VI.2.2.2.2 | <b>VI.2.1.1.2.2</b> | VI.2.1.1.2.2 | 2094 | MF580824.1  | pigeon               | China | GX0004          | 2013 |
| VI_k | VI.2.2.2.2 | <b>VI.2.1.1.2.2</b> | VI.2.1.1.2.2 | 2095 | MF580825.1  | pigeon               | China | GX0119          | 2015 |
| VI_k | VI.2.2.2.2 | <b>VI.2.1.1.2.2</b> | VI.2.1.1.2.2 | 2096 | MF580826.1  | pigeon               | China | GX0126          | 2015 |
| VI_k | VI.2.2.2.2 | <b>VI.2.1.1.2.2</b> | VI.2.1.1.2.2 | 2097 | MF580827.1  | pigeon               | China | GX1103          | 2015 |
| VI_k | VI.2.2.2.2 | <b>VI.2.1.1.2.2</b> | VI.2.1.1.2.2 | 2472 | MG840651.1  | environment          | China | Hubei_HD240     | 2017 |
| VI_k | VI.2.2.2.2 | <b>VI.2.1.1.2.2</b> | VI.2.1.1.2.2 | 2473 | MG840652.1  | pigeon               | China | Fujian_1233     | 2014 |
| VI_k | VI.2.2.2.2 | <b>VI.2.1.1.2.2</b> | VI.2.1.1.2.2 | 2474 | MG840653.1  | pigeon               | China | Guizhou_1050    | 2017 |
| VI_k | VI.2.2.2.2 | <b>VI.2.1.1.2.2</b> | VI.2.1.1.2.2 | 2475 | MG840654.1  | pigeon               | China | Ningxia_2068    | 2016 |
| VI_k | VI.2.2.2.2 | <b>VI.2.1.1.2.2</b> | VI.2.1.1.2.2 | 2476 | MG840655.1  | pigeon               | China | Qinghai_1325    | 2017 |
| VI_k | VI.2.2.2.2 | <b>VI.2.1.1.2.2</b> | VI.2.1.1.2.2 | 2477 | MG840656.1  | pigeon               | China | Qinghai_1344    | 2017 |
| VI_k | VI.2.2.2.2 | <b>VI.2.1.1.2.2</b> | VI.2.1.1.2.2 | 2478 | MG840657.1  | pigeon               | China | Sichuan_2045    | 2014 |

|      |            |              |              |      |            |               |           |                        |      |
|------|------------|--------------|--------------|------|------------|---------------|-----------|------------------------|------|
| VI_k | VI.2.2.2.2 | VI.2.1.1.2.2 | VI.2.1.1.2.2 | 2479 | MG840658.1 | pigeon        | China     | Yunnan_1205            | 2015 |
| VI_k | VI.2.2.2.2 | VI.2.1.1.2.2 | VI.2.1.1.2.2 | 2480 | MG840659.1 | pigeon        | China     | Yunnan_1336            | 2015 |
| VI_k | VI.2.2.2.2 | VI.2.1.1.2.2 | VI.2.1.1.2.2 | 2481 | MG840660.1 | pigeon        | China     | Yunnan_1453            | 2017 |
| VI_k | VI.2.2.2.2 | VI.2.1.1.2.2 | VI.2.1.1.2.2 | 2488 | MG878084.1 | pigeon        | China     | LN                     | 2017 |
| VI_h | VI.2.1     | VI.2.1.2     | VI.2.1.2     | 750  | HG326601   | pigeon        | Nigeria   | NIE07_061              | 2007 |
| VI_h | VI.2.1     | VI.2.1.2     | VI.2.1.2     | 751  | HG326602   | pigeon        | Nigeria   | NIE07_062              | 2007 |
| VI_h | VI.2.1     | VI.2.1.2     | VI.2.1.2     | 752  | HG326603   | pigeon        | Nigeria   | NIE07_063              | 2007 |
| VI_h | VI.2.1     | VI.2.1.2     | VI.2.1.2     | 753  | HG326604   | pigeon        | Nigeria   | NIE09_1898             | 2009 |
| VI_h | VI.2.1     | VI.2.1.2     | VI.2.1.2     | 755  | JX518532   | laughing_dove | Kenya     | B2_Isiolo              | 2012 |
| VI_h | VI.2.1     | VI.2.1.2     | VI.2.1.2     | 757  | HG424627   | pigeon        | Nigeria   | NIE13_092              | 2013 |
| VI_h | VI.2.1     | VI.2.1.2     | VI.2.1.2     | 758  | JQ039387   | pigeon        | Nigeria   | VRD08_37BRpe_7_9_      | 2008 |
| VI_h | VI.2.1     | VI.2.1.2     | VI.2.1.2     | 759  | JQ039391   | pigeon        | Nigeria   | VRD07_231              | 2007 |
| VI_h | VI.2.1     | VI.2.1.2     | VI.2.1.2     | 760  | AY734536   | pigeon        | Argentina | Capital_3              | 1997 |
| VI_h | VI.2.1     | VI.2.1.2     | VI.2.1.2     | 2021 | KX097024.1 | pigeon        | Brazil    | N1065_14               | 2014 |
| VI_h | VI.2.1     | VI.2.1.2     | VI.2.1.2     | 2363 | MH996920   | quail         | Nigeria   | VRD08_385_N23          | 2008 |
| VI_h | VI.2.1     | VI.2.1.2     | VI.2.1.2     | 2435 | MH996992   | pigeon        | Nigeria   | Alaba_rago_VRD32_15_32 | 2015 |
| VI_f | VI.1.2.1   | VI.2.2.1     | VI.2.2.1     | 706  | JN872180   | waterfowl     | USA       | Texas_209682_          | 2002 |
| VI_f | VI.1.2.1   | VI.2.2.1     | VI.2.2.1     | 707  | JN872182   | pigeon        | USA       | New_York_12339         | 1998 |
| VI_f | VI.1.2.1   | VI.2.2.1     | VI.2.2.1     | 708  | JN942095   | pigeon        | USA       | Oklahoma_7668_1997_    | 1997 |
| VI_f | VI.1.2.1   | VI.2.2.1     | VI.2.2.1     | 709  | JN942098   | pigeon        | USA       | North_Carolina_56404_  | 2000 |
| VI_f | VI.1.2.1   | VI.2.2.1     | VI.2.2.1     | 710  | JN942099   | gannet        | USA       | Pennsylvania_25017_    | 2000 |
| VI_f | VI.1.2.1   | VI.2.2.1     | VI.2.2.1     | 711  | JN967786   | pigeon        | USA       | New_Jersey_58300_4_    | 2000 |
| VI_f | VI.1.2.1   | VI.2.2.1     | VI.2.2.1     | 712  | JX901312   | pigeon        | USA       | 101                    | 2001 |
| VI_f | VI.1.2.1   | VI.2.2.1     | VI.2.2.1     | 713  | JX901318   | duck          | USA       | PA_0203                | 2002 |
| VI_f | VI.1.2.1   | VI.2.2.1     | VI.2.2.1     | 714  | JX901341   | pigeon        | USA       | PA_0712                | 2007 |
| VI_f | VI.1.2.1   | VI.2.2.1     | VI.2.2.1     | 715  | JN872187   | pigeon        | USA       | Illinois_11748         | 1993 |
| VI_f | VI.1.2.1   | VI.2.2.1     | VI.2.2.1     | 716  | JN872185   | pigeon        | USA       | New_York_32851_2       | 1984 |
| VI_f | VI.1.2.1   | VI.2.2.1     | VI.2.2.1     | 717  | JN872186   | pigeon        | USA       | Indiana_18002          | 1991 |
| VI_f | VI.1.2.1   | VI.2.2.1     | VI.2.2.1     | 718  | JN872188   | pigeon        | USA       | Minnesota_2446         | 1989 |
| VI_f | VI.1.2.1   | VI.2.2.1     | VI.2.2.1     | 719  | FJ410148   | pigeon        | USA       | Texas                  | 1998 |
| VI_f | VI.1.2.1   | VI.2.2.1     | VI.2.2.1     | 721  | JN942022   | chicken       | USA       | Texas_309968           | 2004 |
| VI_e | VI.1.2.2   | VI.2.2.2     | VI.2.2.2     | 689  | AY325798   | pigeon        | China     | YN_P1                  | _    |
| VI_e | VI.1.2.2   | VI.2.2.2     | VI.2.2.2     | 690  | DQ417113   | pigeon        | China     | Beijing_PB01_STP       | 1996 |
| VI_e | VI.1.2.2   | VI.2.2.2     | VI.2.2.2     | 691  | FJ480825   | pigeon        | China     | PG_JS_1                | 2005 |

|       |          |                 |          |     |            |               |        |               |      |
|-------|----------|-----------------|----------|-----|------------|---------------|--------|---------------|------|
| VI_e  | VI.1.2.2 | <b>VI.2.2.2</b> | VI.2.2.2 | 692 | FJ480826   | pigeon        | China  | PG_JS_1       | 2006 |
| VI_e  | VI.1.2.2 | <b>VI.2.2.2</b> | VI.2.2.2 | 693 | FJ766528   | pigeon        | China  | 05_029        | 2005 |
| VI_e  | VI.1.2.2 | <b>VI.2.2.2</b> | VI.2.2.2 | 694 | GQ338311   | _             | China  | 28            | 2005 |
| VI_e  | VI.1.2.2 | <b>VI.2.2.2</b> | VI.2.2.2 | 695 | JQ290284   | pigeon        | China  | Anhui_1       | 2009 |
| VI_e  | VI.1.2.2 | <b>VI.2.2.2</b> | VI.2.2.2 | 696 | JX244794   | pigeon        | China  | 100           | 2008 |
| VI_e  | VI.1.2.2 | <b>VI.2.2.2</b> | VI.2.2.2 | 697 | JX244801   | pigeon        | China  | 107           | 2008 |
| VI_e  | VI.1.2.2 | <b>VI.2.2.2</b> | VI.2.2.2 | 698 | JX244803   | pigeon        | China  | 110           | 2008 |
| VI_e  | VI.1.2.2 | <b>VI.2.2.2</b> | VI.2.2.2 | 699 | JX244805   | pigeon        | China  | 112           | 2008 |
| VI_e  | VI.1.2.2 | <b>VI.2.2.2</b> | VI.2.2.2 | 700 | KJ607163   | pigeon        | China  | LJS_1         | 2004 |
| VI_e  | VI.1.2.2 | <b>VI.2.2.2</b> | VI.2.2.2 | 701 | KJ607164   | pigeon        | China  | LJS_1         | 2003 |
| VI_e  | VI.1.2.2 | <b>VI.2.2.2</b> | VI.2.2.2 | 702 | KJ808820   | pigeon        | China  | SD            | 2012 |
| VI_e  | VI.1.2.2 | <b>VI.2.2.2</b> | VI.2.2.2 | 703 | KT381596   | pigeon        | China  | Guangdong_GM8 | 2013 |
| VI_e  | VI.1.2.2 | <b>VI.2.2.2</b> | VI.2.2.2 | 704 | KX710209.1 | pigeon        | India  | D167          | 2015 |
| VI_e  | VI.1.2.2 | <b>VI.2.2.2</b> | VI.2.2.2 | 705 | AF358785   | pigeon        | China  | 98_1          | 1998 |
| VII   | VII      | <b>VII</b>      | VII      | 913 | U62620     | chicken       | Taiwan |               | 1995 |
| VII_b | VII.1.1  | <b>VII.1.1</b>  | VII.1.1  | 933 | AF456443   | goose         | China  | JS_9_01_Go    | 2001 |
| VII_b | VII.1.1  | <b>VII.1.1</b>  | VII.1.1  | 935 | DQ227247   | chicken       | China  | Shandong_SDD  | 2001 |
| VII_b | VII.1.1  | <b>VII.1.1</b>  | VII.1.1  | 936 | DQ227249   | chicken       | China  | Shandong_SQD  | 2004 |
| VII_b | VII.1.1  | <b>VII.1.1</b>  | VII.1.1  | 937 | DQ228922   | chicken       | China  | Shandong_SL   | 2003 |
| VII_b | VII.1.1  | <b>VII.1.1</b>  | VII.1.1  | 938 | DQ363530   | chicken       | China  | Shandong_WHZ  | 2003 |
| VII_b | VII.1.1  | <b>VII.1.1</b>  | VII.1.1  | 939 | DQ363533   | chicken       | China  | Shandong_SCL  | 2003 |
| VII_b | VII.1.1  | <b>VII.1.1</b>  | VII.1.1  | 941 | DQ485231   | chicken       | China  | Guangxi_11    | 2003 |
| VII_b | VII.1.1  | <b>VII.1.1</b>  | VII.1.1  | 942 | DQ485261   | chicken       | China  | Guangxi10     | 2003 |
| VII_b | VII.1.1  | <b>VII.1.1</b>  | VII.1.1  | 943 | DQ485271   | chicken       | China  | Guangxi14     | 2005 |
| VII_b | VII.1.1  | <b>VII.1.1</b>  | VII.1.1  | 944 | DQ485274   | dove          | China  | Guangxi15     | 2005 |
| VII_b | VII.1.1  | <b>VII.1.1</b>  | VII.1.1  | 945 | DQ486859   | chicken       | China  | GM            | 2001 |
| VII_b | VII.1.1  | <b>VII.1.1</b>  | VII.1.1  | 946 | EF211814   | goose         | China  | JS_8          | 2006 |
| VII_b | VII.1.1  | <b>VII.1.1</b>  | VII.1.1  | 947 | EF589132   | fightcock     | China  | DQ_Guizhou_   | _    |
| VII_b | VII.1.1  | <b>VII.1.1</b>  | VII.1.1  | 948 | EF589133   | pheasant      | China  | 98_Guizhou    | 1998 |
| VII_b | VII.1.1  | <b>VII.1.1</b>  | VII.1.1  | 949 | EF592500   | mandarin_duck | China  | HLJ_07        | 2005 |
| VII_b | VII.1.1  | <b>VII.1.1</b>  | VII.1.1  | 950 | EF592501   | mandarin_duck | China  | HLJ_34        | 2005 |
| VII_b | VII.1.1  | <b>VII.1.1</b>  | VII.1.1  | 951 | EF592503   | mandarin_duck | China  | HLJ_42        | 2006 |
| VII_b | VII.1.1  | <b>VII.1.1</b>  | VII.1.1  | 952 | EF592505   | mallard       | China  | HLJ_50        | 2006 |
| VII_b | VII.1.1  | <b>VII.1.1</b>  | VII.1.1  | 953 | EF592506   | mandarin_duck | China  | HLJ_54        | 2006 |

|       |         |                |         |     |          |                      |       |                 |      |
|-------|---------|----------------|---------|-----|----------|----------------------|-------|-----------------|------|
| VII_b | VII.1.1 | <b>VII.1.1</b> | VII.1.1 | 954 | EF592507 | whitefronted_goose   | China | HLJ_75          | 2006 |
| VII_b | VII.1.1 | <b>VII.1.1</b> | VII.1.1 | 955 | EF592509 | common_teal_         | China | HLJ_82          | 2006 |
| VII_b | VII.1.1 | <b>VII.1.1</b> | VII.1.1 | 956 | EF592510 | mallard              | China | HLJ_154         | 2006 |
| VII_b | VII.1.1 | <b>VII.1.1</b> | VII.1.1 | 957 | EU258658 | chicken              | China | 20252           | 2002 |
| VII_b | VII.1.1 | <b>VII.1.1</b> | VII.1.1 | 958 | EU258661 | chicken              | China | 22433           | 2002 |
| VII_b | VII.1.1 | <b>VII.1.1</b> | VII.1.1 | 959 | EU258662 | chicken              | China | 22435           | 2002 |
| VII_b | VII.1.1 | <b>VII.1.1</b> | VII.1.1 | 960 | FJ480774 | rough_legged_buzzard | China | HLJ009          | 2006 |
| VII_b | VII.1.1 | <b>VII.1.1</b> | VII.1.1 | 961 | FJ480775 | longearde_owl        | China | HLJ012          | 2006 |
| VII_b | VII.1.1 | <b>VII.1.1</b> | VII.1.1 | 962 | FJ480776 | rough_legged_buzzard | China | HLJ013          | 2006 |
| VII_b | VII.1.1 | <b>VII.1.1</b> | VII.1.1 | 963 | FJ480779 | Japanese_sparrowhawk | China | AG_HLJ070       | 2006 |
| VII_b | VII.1.1 | <b>VII.1.1</b> | VII.1.1 | 964 | FJ480780 | mallard              | China | HLJ127          | 2006 |
| VII_b | VII.1.1 | <b>VII.1.1</b> | VII.1.1 | 965 | FJ480781 | mallard              | China | HLJ128          | 2006 |
| VII_b | VII.1.1 | <b>VII.1.1</b> | VII.1.1 | 966 | FJ480782 | mallard              | China | HLJ355          | 2006 |
| VII_b | VII.1.1 | <b>VII.1.1</b> | VII.1.1 | 967 | FJ480784 | mallard              | China | HLJ363          | 2005 |
| VII_b | VII.1.1 | <b>VII.1.1</b> | VII.1.1 | 968 | FJ480785 | mallard              | China | HLJ374          | 2006 |
| VII_b | VII.1.1 | <b>VII.1.1</b> | VII.1.1 | 969 | FJ480787 | mallard              | China | HLJ016          | 2006 |
| VII_b | VII.1.1 | <b>VII.1.1</b> | VII.1.1 | 970 | FJ480789 | chicken              | China | GD_1            | 2005 |
| VII_b | VII.1.1 | <b>VII.1.1</b> | VII.1.1 | 971 | FJ480796 | chicken              | China | HN_1            | 2001 |
| VII_b | VII.1.1 | <b>VII.1.1</b> | VII.1.1 | 972 | FJ480797 | chicken              | China | HN_1            | 2003 |
| VII_b | VII.1.1 | <b>VII.1.1</b> | VII.1.1 | 973 | FJ480800 | chicken              | China | JL_1            | 2003 |
| VII_b | VII.1.1 | <b>VII.1.1</b> | VII.1.1 | 974 | FJ480801 | chicken              | China | JL_1            | 2005 |
| VII_b | VII.1.1 | <b>VII.1.1</b> | VII.1.1 | 975 | FJ480802 | chicken              | China | JL_1            | 2006 |
| VII_b | VII.1.1 | <b>VII.1.1</b> | VII.1.1 | 976 | FJ480803 | chicken              | China | JL_2            | 2003 |
| VII_b | VII.1.1 | <b>VII.1.1</b> | VII.1.1 | 977 | FJ480804 | chicken              | China | JL_2            | 2006 |
| VII_b | VII.1.1 | <b>VII.1.1</b> | VII.1.1 | 978 | FJ480805 | chicken              | China | JL_3            | 2003 |
| VII_b | VII.1.1 | <b>VII.1.1</b> | VII.1.1 | 979 | FJ480807 | chicken              | China | JL_5            | 2003 |
| VII_b | VII.1.1 | <b>VII.1.1</b> | VII.1.1 | 980 | FJ480820 | chicken              | China | SHX_1           | 2006 |
| VII_b | VII.1.1 | <b>VII.1.1</b> | VII.1.1 | 981 | FJ608335 | chicken              | China | CJG_Xinjiang_07 | 2007 |
| VII_b | VII.1.1 | <b>VII.1.1</b> | VII.1.1 | 982 | FJ608338 | chicken              | China | SH_Zhejiang     | 2006 |
| VII_b | VII.1.1 | <b>VII.1.1</b> | VII.1.1 | 984 | FJ608348 | chicken              | China | TCQQ_Tianjin    | 2008 |
| VII_b | VII.1.1 | <b>VII.1.1</b> | VII.1.1 | 985 | FJ608350 | chicken              | China | DFGS_Beijing    | 2008 |
| VII_b | VII.1.1 | <b>VII.1.1</b> | VII.1.1 | 986 | FJ754271 | chicken              | China | WF00C           | 2000 |
| VII_b | VII.1.1 | <b>VII.1.1</b> | VII.1.1 | 987 | FJ882015 | chicken              | China | HG_Beijing      | 2009 |
| VII_b | VII.1.1 | <b>VII.1.1</b> | VII.1.1 | 988 | GQ245796 | chicken              | China | AH_2            | 2008 |



|       |         |                |         |      |          |         |       |          |      |
|-------|---------|----------------|---------|------|----------|---------|-------|----------|------|
| VII_b | VII.1.1 | <b>VII.1.1</b> | VII.1.1 | 989  | GQ245797 | chicken | China | AN_11    | 2007 |
| VII_b | VII.1.1 | <b>VII.1.1</b> | VII.1.1 | 990  | GQ245798 | chicken | China | CZ_10    | 2008 |
| VII_b | VII.1.1 | <b>VII.1.1</b> | VII.1.1 | 991  | GQ245799 | chicken | China | HN_7_06  | 2006 |
| VII_b | VII.1.1 | <b>VII.1.1</b> | VII.1.1 | 992  | GQ245800 | goose   | China | JS_18    | 2008 |
| VII_b | VII.1.1 | <b>VII.1.1</b> | VII.1.1 | 993  | GQ245801 | pigeon  | China | SD_15    | 2008 |
| VII_b | VII.1.1 | <b>VII.1.1</b> | VII.1.1 | 994  | GQ245802 | chicken | China | SN_6     | 2008 |
| VII_b | VII.1.1 | <b>VII.1.1</b> | VII.1.1 | 995  | GQ245803 | chicken | China | SN_19    | 2008 |
| VII_b | VII.1.1 | <b>VII.1.1</b> | VII.1.1 | 996  | GQ245804 | chicken | China | SN_20    | 2008 |
| VII_b | VII.1.1 | <b>VII.1.1</b> | VII.1.1 | 997  | GQ245805 | chicken | China | SY_1     | 2008 |
| VII_b | VII.1.1 | <b>VII.1.1</b> | VII.1.1 | 998  | GQ245806 | chicken | China | XY_11    | 2008 |
| VII_b | VII.1.1 | <b>VII.1.1</b> | VII.1.1 | 999  | GQ245807 | chicken | China | XY_14    | 2008 |
| VII_b | VII.1.1 | <b>VII.1.1</b> | VII.1.1 | 1000 | GQ245808 | chicken | China | XY_31    | 2007 |
| VII_b | VII.1.1 | <b>VII.1.1</b> | VII.1.1 | 1001 | GQ245809 | chicken | China | XZ_5     | 2007 |
| VII_b | VII.1.1 | <b>VII.1.1</b> | VII.1.1 | 1002 | GQ245810 | chicken | China | XZ_7     | 2008 |
| VII_b | VII.1.1 | <b>VII.1.1</b> | VII.1.1 | 1003 | GQ245811 | chicken | China | XZ_8     | 2007 |
| VII_b | VII.1.1 | <b>VII.1.1</b> | VII.1.1 | 1004 | GQ245812 | chicken | China | XZ_9     | 2008 |
| VII_b | VII.1.1 | <b>VII.1.1</b> | VII.1.1 | 1005 | GQ245813 | chicken | China | XZ_12    | 2007 |
| VII_b | VII.1.1 | <b>VII.1.1</b> | VII.1.1 | 1006 | GQ245814 | chicken | China | XZ_12    | 2008 |
| VII_b | VII.1.1 | <b>VII.1.1</b> | VII.1.1 | 1007 | GQ245815 | chicken | China | XZ_13    | 2008 |
| VII_b | VII.1.1 | <b>VII.1.1</b> | VII.1.1 | 1008 | GQ245816 | chicken | China | XZ_16    | 2007 |
| VII_b | VII.1.1 | <b>VII.1.1</b> | VII.1.1 | 1009 | GQ245817 | chicken | China | XZ_20    | 2007 |
| VII_b | VII.1.1 | <b>VII.1.1</b> | VII.1.1 | 1010 | GQ245818 | ostrich | China | YZ_22    | 2007 |
| VII_b | VII.1.1 | <b>VII.1.1</b> | VII.1.1 | 1011 | GQ245819 | chicken | China | ZJ_17    | 2008 |
| VII_b | VII.1.1 | <b>VII.1.1</b> | VII.1.1 | 1013 | GU564399 | chicken | China | FMW      | 2006 |
| VII_b | VII.1.1 | <b>VII.1.1</b> | VII.1.1 | 1014 | HM188398 | duck    | China | SDFCH    | 2008 |
| VII_b | VII.1.1 | <b>VII.1.1</b> | VII.1.1 | 1015 | HM188399 | duck    | China | SDWF02   | 2008 |
| VII_b | VII.1.1 | <b>VII.1.1</b> | VII.1.1 | 1016 | HM188400 | duck    | China | SDWF03   | 2008 |
| VII_b | VII.1.1 | <b>VII.1.1</b> | VII.1.1 | 1017 | HM188401 | duck    | China | SDWF04   | 2009 |
| VII_b | VII.1.1 | <b>VII.1.1</b> | VII.1.1 | 1018 | HM188402 | duck    | China | SDWF05   | 2009 |
| VII_b | VII.1.1 | <b>VII.1.1</b> | VII.1.1 | 1019 | HM748947 | chicken | China | SD4      | 2008 |
| VII_b | VII.1.1 | <b>VII.1.1</b> | VII.1.1 | 1020 | HQ317395 | duck    | China | SD09     | 2009 |
| VII_b | VII.1.1 | <b>VII.1.1</b> | VII.1.1 | 1021 | HQ717357 | duck    | China | GD09_1   | 2009 |
| VII_b | VII.1.1 | <b>VII.1.1</b> | VII.1.1 | 1022 | JF343539 | chicken | China | Guangxi9 | 2003 |
| VII_b | VII.1.1 | <b>VII.1.1</b> | VII.1.1 | 1023 | JN400895 | duck    | China | SD03     | 2009 |

|       |         |                |         |      |            |         |       |             |      |
|-------|---------|----------------|---------|------|------------|---------|-------|-------------|------|
| VII_b | VII.1.1 | <b>VII.1.1</b> | VII.1.1 | 1024 | JN400897   | chicken | China | SDLY01      | 2010 |
| VII_b | VII.1.1 | <b>VII.1.1</b> | VII.1.1 | 1026 | JN631747   | goose   | China | JS_5        | 2005 |
| VII_b | VII.1.1 | <b>VII.1.1</b> | VII.1.1 | 1027 | JQ013855   | chicken | China | JS_01       | 2011 |
| VII_b | VII.1.1 | <b>VII.1.1</b> | VII.1.1 | 1028 | JQ013857   | chicken | China | JS_03       | 2011 |
| VII_b | VII.1.1 | <b>VII.1.1</b> | VII.1.1 | 1029 | JQ013858   | chicken | China | JS_04       | 2011 |
| VII_b | VII.1.1 | <b>VII.1.1</b> | VII.1.1 | 1030 | JQ013859   | chicken | China | JS_05       | 2011 |
| VII_b | VII.1.1 | <b>VII.1.1</b> | VII.1.1 | 1031 | JQ013863   | chicken | China | JS_09       | 2011 |
| VII_b | VII.1.1 | <b>VII.1.1</b> | VII.1.1 | 1032 | JQ013866   | chicken | China | JS_12       | 2011 |
| VII_b | VII.1.1 | <b>VII.1.1</b> | VII.1.1 | 1033 | JQ013867   | chicken | China | JS_13       | 2011 |
| VII_b | VII.1.1 | <b>VII.1.1</b> | VII.1.1 | 1034 | JQ013869   | chicken | China | JS_15       | 2011 |
| VII_b | VII.1.1 | <b>VII.1.1</b> | VII.1.1 | 1035 | JQ013874   | chicken | China | JS_20       | 2011 |
| VII_b | VII.1.1 | <b>VII.1.1</b> | VII.1.1 | 1036 | JQ013876   | chicken | China | JS_22       | 2011 |
| VII_b | VII.1.1 | <b>VII.1.1</b> | VII.1.1 | 1037 | JQ013879   | duck    | China | JS_01       | 2010 |
| VII_b | VII.1.1 | <b>VII.1.1</b> | VII.1.1 | 1038 | JX193076   | chicken | China | Guangxi15   | 2010 |
| VII_b | VII.1.1 | <b>VII.1.1</b> | VII.1.1 | 1039 | JX244790   | pigeon  | China | ZQ_17       | 2000 |
| VII_b | VII.1.1 | <b>VII.1.1</b> | VII.1.1 | 1040 | JX244791   | pigeon  | China | SD_54       | 2006 |
| VII_b | VII.1.1 | <b>VII.1.1</b> | VII.1.1 | 1041 | JX244792   | pigeon  | China | SD_55       | 2006 |
| VII_b | VII.1.1 | <b>VII.1.1</b> | VII.1.1 | 1043 | JX482550   | seafowl | China | H12         | 2011 |
| VII_b | VII.1.1 | <b>VII.1.1</b> | VII.1.1 | 1044 | KC542892   | chicken | China | Liaoning_01 | 2005 |
| VII_b | VII.1.1 | <b>VII.1.1</b> | VII.1.1 | 1045 | KC542893   | chicken | China | Liaoning_02 | 2005 |
| VII_b | VII.1.1 | <b>VII.1.1</b> | VII.1.1 | 1046 | KC542899   | chicken | China | Jilin_01    | 2008 |
| VII_b | VII.1.1 | <b>VII.1.1</b> | VII.1.1 | 1047 | KC542903   | chicken | China | Beijing_02  | 2009 |
| VII_b | VII.1.1 | <b>VII.1.1</b> | VII.1.1 | 1048 | KC542908   | chicken | China | Shandong_01 | 2011 |
| VII_b | VII.1.1 | <b>VII.1.1</b> | VII.1.1 | 1049 | KC542909   | chicken | China | Shandong_02 | 2011 |
| VII_b | VII.1.1 | <b>VII.1.1</b> | VII.1.1 | 1050 | KC750149   | duck    | China | GD_SD       | 2006 |
| VII_b | VII.1.1 | <b>VII.1.1</b> | VII.1.1 | 1051 | KC750156   | duck    | China | GD_SD       | 2009 |
| VII_b | VII.1.1 | <b>VII.1.1</b> | VII.1.1 | 1052 | KC750157   | duck    | China | GD_SS       | 2010 |
| VII_b | VII.1.1 | <b>VII.1.1</b> | VII.1.1 | 1053 | KF219498.1 | duck    | China | GD_SS       | 2010 |
| VII_b | VII.1.1 | <b>VII.1.1</b> | VII.1.1 | 1054 | KJ184574   | chicken | China | JS_04       | 2012 |
| VII_b | VII.1.1 | <b>VII.1.1</b> | VII.1.1 | 1055 | KJ184591   | chicken | China | JS_22       | 2012 |
| VII_b | VII.1.1 | <b>VII.1.1</b> | VII.1.1 | 1056 | KJ184600   | chicken | China | JS_03       | 2012 |
| VII_b | VII.1.1 | <b>VII.1.1</b> | VII.1.1 | 1057 | KJ450977   | chicken | China | Jiangxi_07  | 2009 |
| VII_b | VII.1.1 | <b>VII.1.1</b> | VII.1.1 | 1058 | KJ525677   | goose   | China | GD_GD       | 2008 |
| VII_b | VII.1.1 | <b>VII.1.1</b> | VII.1.1 | 1059 | KJ525678   | duck    | China | SD_GM       | 2008 |

|       |         |                |         |      |            |                |       |                |      |
|-------|---------|----------------|---------|------|------------|----------------|-------|----------------|------|
| VII_b | VII.1.1 | <b>VII.1.1</b> | VII.1.1 | 1060 | KJ525681   | duck           | China | GD_GDX         | 2006 |
| VII_b | VII.1.1 | <b>VII.1.1</b> | VII.1.1 | 1061 | KJ525682   | duck           | China | GD_GDY         | 2006 |
| VII_b | VII.1.1 | <b>VII.1.1</b> | VII.1.1 | 1062 | KJ525683   | chicken        | China | SX_SX1         | 2008 |
| VII_b | VII.1.1 | <b>VII.1.1</b> | VII.1.1 | 1063 | KJ525684   | chicken        | China | SX_SX2         | 2008 |
| VII_b | VII.1.1 | <b>VII.1.1</b> | VII.1.1 | 1064 | KJ525687   | chicken        | China | SD_XT          | 2009 |
| VII_b | VII.1.1 | <b>VII.1.1</b> | VII.1.1 | 1065 | KJ525697   | chicken        | China | SD_LY2         | 2008 |
| VII_b | VII.1.1 | <b>VII.1.1</b> | VII.1.1 | 1066 | KJ525698   | chicken        | China | SD_LY1         | 2008 |
| VII_b | VII.1.1 | <b>VII.1.1</b> | VII.1.1 | 1067 | KJ525709   | chicken        | China | SD_BD          | 2010 |
| VII_b | VII.1.1 | <b>VII.1.1</b> | VII.1.1 | 1068 | KJ525710   | chicken        | China | GD_ND          | 2008 |
| VII_b | VII.1.1 | <b>VII.1.1</b> | VII.1.1 | 1069 | KJ525716   | chicken        | China | SD_MH          | 2009 |
| VII_b | VII.1.1 | <b>VII.1.1</b> | VII.1.1 | 1070 | KJ525718   | chicken        | China | SD_CQ          | 2009 |
| VII_b | VII.1.1 | <b>VII.1.1</b> | VII.1.1 | 1071 | KJ600786   | duck           | China | SD_134         | 2009 |
| VII_b | VII.1.1 | <b>VII.1.1</b> | VII.1.1 | 1072 | KJ607170   | quail          | China | LJS_101107     | 2010 |
| VII_b | VII.1.1 | <b>VII.1.1</b> | VII.1.1 | 1073 | KJ825877   | chicken        | China | Guangxi_L1     | 2011 |
| VII_b | VII.1.1 | <b>VII.1.1</b> | VII.1.1 | 1074 | KP742770   | Sheldrake_duck | China | Guizhou_SS1    | 2014 |
| VII_b | VII.1.1 | <b>VII.1.1</b> | VII.1.1 | 1075 | KT381593   | chicken        | China | Guangdong_GM5  | 2013 |
| VII_b | VII.1.1 | <b>VII.1.1</b> | VII.1.1 | 1076 | KT381594   | duck           | China | Guangdong_YF21 | 2014 |
| VII_b | VII.1.1 | <b>VII.1.1</b> | VII.1.1 | 1077 | KU200252   | goose          | China | Jilin_TH01     | 2015 |
| VII_b | VII.1.1 | <b>VII.1.1</b> | VII.1.1 | 1078 | KU933951   | duck           | China | Guizhou_JH     | 2015 |
| VII_b | VII.1.1 | <b>VII.1.1</b> | VII.1.1 | 2005 | MF278935.1 | white_duck     | China | FS_NH_A        | 2006 |
| VII_d | VII.1.1 | <b>VII.1.1</b> | VII.1.1 | 1102 | AF358787   | fowl           | China |                | 1999 |
| VII_d | VII.1.1 | <b>VII.1.1</b> | VII.1.1 | 1103 | AF358788   | fowl           | China |                | 2000 |
| VII_d | VII.1.1 | <b>VII.1.1</b> | VII.1.1 | 1104 | AF364835   | fowl           | China | 98_3           | 1998 |
| VII_d | VII.1.1 | <b>VII.1.1</b> | VII.1.1 | 1105 | AF431744   | goose          | China | ZJ1            | 2000 |
| VII_d | VII.1.1 | <b>VII.1.1</b> | VII.1.1 | 1106 | AF456436   | goose          | China | JS_3           | 1998 |
| VII_d | VII.1.1 | <b>VII.1.1</b> | VII.1.1 | 1107 | AF456438   | goose          | China | ZJ_1           | 2000 |
| VII_d | VII.1.1 | <b>VII.1.1</b> | VII.1.1 | 1109 | AF456442   | goose          | China | JS_5           | 2001 |
| VII_d | VII.1.1 | <b>VII.1.1</b> | VII.1.1 | 1110 | AF456444   | goose          | China | JS_7           | 2001 |
| VII_d | VII.1.1 | <b>VII.1.1</b> | VII.1.1 | 1111 | AF473851   | goose          | China | SF02           | 2002 |
| VII_d | VII.1.1 | <b>VII.1.1</b> | VII.1.1 | 1112 | AY253912   | parrot         | China | YN_PA01        | 2001 |
| VII_d | VII.1.1 | <b>VII.1.1</b> | VII.1.1 | 1113 | AY325797   | goose          | China | GPV_SF02       | --   |
| VII_d | VII.1.1 | <b>VII.1.1</b> | VII.1.1 | 1115 | AY337464   | goose          | China | --             | --   |
| VII_d | VII.1.1 | <b>VII.1.1</b> | VII.1.1 | 1116 | DQ080015   | penguin        | China | Beijing        | 1999 |
| VII_d | VII.1.1 | <b>VII.1.1</b> | VII.1.1 | 1117 | DQ114478   | goose          | China | HZ             | --   |

|       |         |         |         |      |          |               |             |               |      |
|-------|---------|---------|---------|------|----------|---------------|-------------|---------------|------|
| VII_d | VII.1.1 | VII.1.1 | VII.1.1 | 1118 | DQ227248 | chicken       | China       | Shandong_SGM  | 2001 |
| VII_d | VII.1.1 | VII.1.1 | VII.1.1 | 1119 | DQ227251 | chicken       | China       | Shandong_SKY  | 2003 |
| VII_d | VII.1.1 | VII.1.1 | VII.1.1 | 1120 | DQ227253 | chicken       | China       | Shandong_SPY  | 2003 |
| VII_d | VII.1.1 | VII.1.1 | VII.1.1 | 1121 | DQ363531 | goose         | China       | Jiangsu_JS06  | 2006 |
| VII_d | VII.1.1 | VII.1.1 | VII.1.1 | 1122 | DQ363534 | goose         | China       | Jiangsu_JS03  | 2003 |
| VII_d | VII.1.1 | VII.1.1 | VII.1.1 | 1123 | DQ363535 | chicken       | China       | Shandong_SF   | 2002 |
| VII_d | VII.1.1 | VII.1.1 | VII.1.1 | 1124 | DQ363536 | chicken       | China       | Tianjin_TJ    | 2005 |
| VII_d | VII.1.1 | VII.1.1 | VII.1.1 | 1125 | DQ417110 | goose         | China       | Jiangsu_JS01  | 2001 |
| VII_d | VII.1.1 | VII.1.1 | VII.1.1 | 1126 | DQ485229 | chicken       | China       | Guangxi_7     | 2002 |
| VII_d | VII.1.1 | VII.1.1 | VII.1.1 | 1128 | DQ485269 | chicken       | China       | Guangxi13     | 2004 |
| VII_d | VII.1.1 | VII.1.1 | VII.1.1 | 1129 | DQ839397 | chicken       | Korea       | KBNP_4152     | _    |
| VII_d | VII.1.1 | VII.1.1 | VII.1.1 | 1130 | EF128053 | wild_duck     | China       | JS_3          | 2006 |
| VII_d | VII.1.1 | VII.1.1 | VII.1.1 | 1131 | EF128054 | wild_duck     | China       | JS_1          | 2006 |
| VII_d | VII.1.1 | VII.1.1 | VII.1.1 | 1132 | EF128055 | wild_duck     | China       | JS_2          | 2006 |
| VII_d | VII.1.1 | VII.1.1 | VII.1.1 | 1133 | EF175145 | muscovy_duck  | China       | PX2           | 2003 |
| VII_d | VII.1.1 | VII.1.1 | VII.1.1 | 1134 | EF211807 | goose         | China       | JS_1          | 2005 |
| VII_d | VII.1.1 | VII.1.1 | VII.1.1 | 1135 | EF211809 | goose         | China       | JS_3          | 2005 |
| VII_d | VII.1.1 | VII.1.1 | VII.1.1 | 1136 | EF211810 | goose         | China       | JS_4          | 2005 |
| VII_d | VII.1.1 | VII.1.1 | VII.1.1 | 1137 | EF211811 | goose         | China       | JS_5          | 2006 |
| VII_d | VII.1.1 | VII.1.1 | VII.1.1 | 1138 | EF211812 | goose         | China       | JS_6          | 2006 |
| VII_d | VII.1.1 | VII.1.1 | VII.1.1 | 1139 | EF211813 | goose         | China       | JS_7          | 2006 |
| VII_d | VII.1.1 | VII.1.1 | VII.1.1 | 1140 | EF521889 | mallard       | China       | HLJ_13        | 2005 |
| VII_d | VII.1.1 | VII.1.1 | VII.1.1 | 1141 | EF540729 | goose         | China       | JG97          | _    |
| VII_d | VII.1.1 | VII.1.1 | VII.1.1 | 1142 | EF579731 | chicken       | China       | Shandong_YS   | 2006 |
| VII_d | VII.1.1 | VII.1.1 | VII.1.1 | 1143 | EF579732 | chicken       | China       | Shandong_DG   | 2002 |
| VII_d | VII.1.1 | VII.1.1 | VII.1.1 | 1144 | EF579733 | chicken       | China       | Shandong_Pyan | 2004 |
| VII_d | VII.1.1 | VII.1.1 | VII.1.1 | 1145 | EF579734 | goose         | China       | Guangdong_GZ  | 2006 |
| VII_d | VII.1.1 | VII.1.1 | VII.1.1 | 1146 | EF592502 | mandarin_duck | China       | HLJ_36        | 2005 |
| VII_d | VII.1.1 | VII.1.1 | VII.1.1 | 1147 | EF592504 | bean_goose    | China       | HLJ_48        | 2006 |
| VII_d | VII.1.1 | VII.1.1 | VII.1.1 | 1148 | EF592508 | mallard       | China       | HLJ_78        | 2006 |
| VII_d | VII.1.1 | VII.1.1 | VII.1.1 | 1149 | EU140947 |               | South_Korea | SNU_0202      | 2000 |
| VII_d | VII.1.1 | VII.1.1 | VII.1.1 | 1150 | EU140948 |               | South_Korea | KBNP_4152     | 2004 |
| VII_d | VII.1.1 | VII.1.1 | VII.1.1 | 1151 | EU140949 |               | South_Korea | SNU_5070      | 2005 |
| VII_d | VII.1.1 | VII.1.1 | VII.1.1 | 1152 | EU140950 |               | South_Korea | SNU_5074      | 2005 |

|       |         |                |         |      |          |                     |       |               |      |
|-------|---------|----------------|---------|------|----------|---------------------|-------|---------------|------|
| VII_d | VII.1.1 | <b>VII.1.1</b> | VII.1.1 | 1153 | EU258642 | chicken             | China | 7011          | 2007 |
| VII_d | VII.1.1 | <b>VII.1.1</b> | VII.1.1 | 1155 | EU583503 | chicken             | China | Hebei         | 2004 |
| VII_d | VII.1.1 | <b>VII.1.1</b> | VII.1.1 | 1156 | EU597811 | chicken             | China | SHY           | 2006 |
| VII_d | VII.1.1 | <b>VII.1.1</b> | VII.1.1 | 1157 | FJ011441 | chicken             | China | SDCX          | 2007 |
| VII_d | VII.1.1 | <b>VII.1.1</b> | VII.1.1 | 1158 | FJ011442 | chicken             | China | HNDY          | 2007 |
| VII_d | VII.1.1 | <b>VII.1.1</b> | VII.1.1 | 1159 | FJ011443 | chicken             | China | SDMH          | 2007 |
| VII_d | VII.1.1 | <b>VII.1.1</b> | VII.1.1 | 1160 | FJ011448 | chicken             | China | TZ0601        | 2006 |
| VII_d | VII.1.1 | <b>VII.1.1</b> | VII.1.1 | 1161 | FJ217665 | chicken             | China | SC03          | 2006 |
| VII_d | VII.1.1 | <b>VII.1.1</b> | VII.1.1 | 1162 | FJ217666 | chicken             | China | SC05          | 2006 |
| VII_d | VII.1.1 | <b>VII.1.1</b> | VII.1.1 | 1163 | FJ240168 | goose               | China | HLJ_LL01      | 2008 |
| VII_d | VII.1.1 | <b>VII.1.1</b> | VII.1.1 | 1164 | FJ426563 | chicken             | China | SDWF01        | 2008 |
| VII_d | VII.1.1 | <b>VII.1.1</b> | VII.1.1 | 1165 | FJ480777 | mandarin_duck       | China | HLJ028        | 2006 |
| VII_d | VII.1.1 | <b>VII.1.1</b> | VII.1.1 | 1166 | FJ480778 | whitefronted_goose_ | China | HLJ052        | 2006 |
| VII_d | VII.1.1 | <b>VII.1.1</b> | VII.1.1 | 1167 | FJ480783 | mallard_            | China | HLJ361        | 2005 |
| VII_d | VII.1.1 | <b>VII.1.1</b> | VII.1.1 | 1168 | FJ480788 | wild_bird           | China | HLJ001        | 2006 |
| VII_d | VII.1.1 | <b>VII.1.1</b> | VII.1.1 | 1169 | FJ480790 | chicken             | China | HLJ_1         | 2006 |
| VII_d | VII.1.1 | <b>VII.1.1</b> | VII.1.1 | 1170 | FJ480791 | chicken             | China | HLJ_1         | 2007 |
| VII_d | VII.1.1 | <b>VII.1.1</b> | VII.1.1 | 1171 | FJ480792 | chicken             | China | HLJ_2         | 2006 |
| VII_d | VII.1.1 | <b>VII.1.1</b> | VII.1.1 | 1172 | FJ480798 | chicken             | China | HN_1          | 2004 |
| VII_d | VII.1.1 | <b>VII.1.1</b> | VII.1.1 | 1173 | FJ480799 | chicken             | China | HN_1          | 2007 |
| VII_d | VII.1.1 | <b>VII.1.1</b> | VII.1.1 | 1174 | FJ480806 | chicken             | China | JL_4          | 2003 |
| VII_d | VII.1.1 | <b>VII.1.1</b> | VII.1.1 | 1175 | FJ480809 | chicken             | China | LN_1          | 2006 |
| VII_d | VII.1.1 | <b>VII.1.1</b> | VII.1.1 | 1176 | FJ480810 | chicken             | China | LN_2          | 2006 |
| VII_d | VII.1.1 | <b>VII.1.1</b> | VII.1.1 | 1177 | FJ480812 | chicken             | China | LN_4          | 2006 |
| VII_d | VII.1.1 | <b>VII.1.1</b> | VII.1.1 | 1178 | FJ480813 | chicken             | China | NX_1          | 2005 |
| VII_d | VII.1.1 | <b>VII.1.1</b> | VII.1.1 | 1179 | FJ480818 | chicken             | China | NX_5          | 2006 |
| VII_d | VII.1.1 | <b>VII.1.1</b> | VII.1.1 | 1180 | FJ480819 | chicken             | China | SD_1          | 2006 |
| VII_d | VII.1.1 | <b>VII.1.1</b> | VII.1.1 | 1181 | FJ480824 | mallard_duck        | China | GD_1          | 2005 |
| VII_d | VII.1.1 | <b>VII.1.1</b> | VII.1.1 | 1182 | FJ608334 | chicken             | China | WN_Tianin     | 2003 |
| VII_d | VII.1.1 | <b>VII.1.1</b> | VII.1.1 | 1183 | FJ608336 | chicken             | China | ZSM_Hebei     | 2007 |
| VII_d | VII.1.1 | <b>VII.1.1</b> | VII.1.1 | 1184 | FJ608343 | chicken             | China | GM_Shandong   | 2001 |
| VII_d | VII.1.1 | <b>VII.1.1</b> | VII.1.1 | 1185 | FJ608345 | chicken             | China | DFZD_Jilin    | 2008 |
| VII_d | VII.1.1 | <b>VII.1.1</b> | VII.1.1 | 1186 | FJ608349 | chicken             | China | LGQQ_Liaoning | 2008 |
| VII_d | VII.1.1 | <b>VII.1.1</b> | VII.1.1 | 1187 | FJ608351 | chicken             | China | YZCQ_Liaoning | 2008 |

|       |         |         |         |      |          |              |              |             |      |
|-------|---------|---------|---------|------|----------|--------------|--------------|-------------|------|
| VII_d | VII.1.1 | VII.1.1 | VII.1.1 | 1188 | FJ754272 | duck         | China        | WF00D       | 2000 |
| VII_d | VII.1.1 | VII.1.1 | VII.1.1 | 1189 | FJ754273 | goose        | China        | WF00G       | 2000 |
| VII_d | VII.1.1 | VII.1.1 | VII.1.1 | 1190 | FJ872531 | muscovy_duck | China        | Fuian_FP1   | 2002 |
| VII_d | VII.1.1 | VII.1.1 | VII.1.1 | 1191 | GQ245780 | chicken      | China        | AN_9        | 2007 |
| VII_d | VII.1.1 | VII.1.1 | VII.1.1 | 1192 | GQ245781 | chicken      | China        | CZ_8        | 2008 |
| VII_d | VII.1.1 | VII.1.1 | VII.1.1 | 1193 | GQ245782 | chicken      | China        | DT_3        | 2008 |
| VII_d | VII.1.1 | VII.1.1 | VII.1.1 | 1194 | GQ245783 | chicken      | China        | HA_2        | 2007 |
| VII_d | VII.1.1 | VII.1.1 | VII.1.1 | 1195 | GQ245784 | chicken      | China        | HA_4_08     | 2008 |
| VII_d | VII.1.1 | VII.1.1 | VII.1.1 | 1196 | GQ245785 | chicken      | China        | HA_9        | 2006 |
| VII_d | VII.1.1 | VII.1.1 | VII.1.1 | 1197 | GQ245786 | chicken      | China        | HA_13       | 2007 |
| VII_d | VII.1.1 | VII.1.1 | VII.1.1 | 1198 | GQ245787 | chicken      | China        | HA_14       | 2007 |
| VII_d | VII.1.1 | VII.1.1 | VII.1.1 | 1199 | GQ245788 | chicken      | China        | HA_15       | 2007 |
| VII_d | VII.1.1 | VII.1.1 | VII.1.1 | 1200 | GQ245790 | chicken      | China        | HN_6        | 2007 |
| VII_d | VII.1.1 | VII.1.1 | VII.1.1 | 1201 | GQ245791 | chicken      | China        | SN_5        | 2008 |
| VII_d | VII.1.1 | VII.1.1 | VII.1.1 | 1202 | GQ245792 | chicken      | China        | SY_17       | 2007 |
| VII_d | VII.1.1 | VII.1.1 | VII.1.1 | 1203 | GQ245793 | goose        | China        | XZ_18       | 2007 |
| VII_d | VII.1.1 | VII.1.1 | VII.1.1 | 1204 | GQ245794 | goose        | China        | YZ_19       | 2007 |
| VII_d | VII.1.1 | VII.1.1 | VII.1.1 | 1206 | GQ255639 | goose        | China        | GPMV_SH     | 2009 |
| VII_d | VII.1.1 | VII.1.1 | VII.1.1 | 1207 | GQ849007 | laying_duck  | China        | JSD0812     | 2008 |
| VII_d | VII.1.1 | VII.1.1 | VII.1.1 | 1208 | GU166154 | chicken      | China        | ND_XX       | 2008 |
| VII_d | VII.1.1 | VII.1.1 | VII.1.1 | 1209 | GU227738 | dove         | Serbia       | Serbia_749  | 2007 |
| VII_d | VII.1.1 | VII.1.1 | VII.1.1 | 1210 | GU227739 | sparrowhawk  | Serbia       | Serbia_1038 | 2007 |
| VII_d | VII.1.1 | VII.1.1 | VII.1.1 | 1211 | HM188393 | duck         | China        | SDBZH       | 2007 |
| VII_d | VII.1.1 | VII.1.1 | VII.1.1 | 1212 | HM188396 | duck         | China        | SDTA        | 2007 |
| VII_d | VII.1.1 | VII.1.1 | VII.1.1 | 1213 | HM748945 | chicken      | China        | SD2         | 2008 |
| VII_d | VII.1.1 | VII.1.1 | VII.1.1 | 1214 | HM748946 | chicken      | China        | SD3         | 2008 |
| VII_d | VII.1.1 | VII.1.1 | VII.1.1 | 1215 | JF340367 | goose        | China        | JSG0210     | 2002 |
| VII_d | VII.1.1 | VII.1.1 | VII.1.1 | 1216 | JN599167 | penguin      | China        | BP01        | 1999 |
| VII_d | VII.1.1 | VII.1.1 | VII.1.1 | 1217 | JN872164 | chicken      | Colombia     | 440620      | 2006 |
| VII_d | VII.1.1 | VII.1.1 | VII.1.1 | 1218 | JN986838 | chicken      | South_Africa | ZA_AL495    | 2004 |
| VII_d | VII.1.1 | VII.1.1 | VII.1.1 | 1219 | JQ013861 | chicken      | China        | JS_07       | 2011 |
| VII_d | VII.1.1 | VII.1.1 | VII.1.1 | 1220 | JQ013862 | goose        | China        | JS_08       | 2011 |
| VII_d | VII.1.1 | VII.1.1 | VII.1.1 | 1221 | JQ013864 | chicken      | China        | JS_10       | 2011 |
| VII_d | VII.1.1 | VII.1.1 | VII.1.1 | 1222 | JQ319052 | chicken      | Venezuela    | 7           | 2009 |

|       |         |         |         |      |          |                  |              |              |      |
|-------|---------|---------|---------|------|----------|------------------|--------------|--------------|------|
| VII_d | VII.1.1 | VII.1.1 | VII.1.1 | 1223 | JQ697739 | _                | Malaysia     | 1041_632     | 2009 |
| VII_d | VII.1.1 | VII.1.1 | VII.1.1 | 1224 | JQ894778 | chicken          | China        | HBHD01       | 2012 |
| VII_d | VII.1.1 | VII.1.1 | VII.1.1 | 1225 | JX519467 | chicken          | China        | JSX1         | 2010 |
| VII_d | VII.1.1 | VII.1.1 | VII.1.1 | 1226 | KC292514 | chicken          | China        | F72          | 2010 |
| VII_d | VII.1.1 | VII.1.1 | VII.1.1 | 1227 | KC292517 | chicken          | China        | FH2          | 2010 |
| VII_d | VII.1.1 | VII.1.1 | VII.1.1 | 1228 | KC461214 | chicken          | China        | TC_9         | 2011 |
| VII_d | VII.1.1 | VII.1.1 | VII.1.1 | 1229 | KC542895 | chicken          | China        | Hebei_01     | 2006 |
| VII_d | VII.1.1 | VII.1.1 | VII.1.1 | 1230 | KC542897 | chicken          | China        | Tianjin_01   | 2007 |
| VII_d | VII.1.1 | VII.1.1 | VII.1.1 | 1231 | KC542898 | chicken          | China        | Tianjin_02   | 2007 |
| VII_d | VII.1.1 | VII.1.1 | VII.1.1 | 1232 | KC542902 | chicken          | China        | Beijing_01   | 2012 |
| VII_d | VII.1.1 | VII.1.1 | VII.1.1 | 1233 | KC750150 | duck             | China        | GD_SD        | 2006 |
| VII_d | VII.1.1 | VII.1.1 | VII.1.1 | 1234 | KC750154 | duck             | China        | GD_JY        | 2008 |
| VII_d | VII.1.1 | VII.1.1 | VII.1.1 | 1235 | KC853019 | crested_ibis     | China        | Shaanxi      | 2006 |
| VII_d | VII.1.1 | VII.1.1 | VII.1.1 | 1236 | KF208469 | chicken          | China        | SD883        | 2013 |
| VII_d | VII.1.1 | VII.1.1 | VII.1.1 | 1237 | KF442615 | chicken          | South_Africa | 8100426      | 2008 |
| VII_d | VII.1.1 | VII.1.1 | VII.1.1 | 1238 | KF792023 | turkey           | Israel       | 832_497      | 2009 |
| VII_d | VII.1.1 | VII.1.1 | VII.1.1 | 1240 | KJ450979 | chicken          | China        | ShanDong_024 | 2010 |
| VII_d | VII.1.1 | VII.1.1 | VII.1.1 | 1241 | KJ525676 | goose            | China        | GD_GZ        | 2006 |
| VII_d | VII.1.1 | VII.1.1 | VII.1.1 | 1242 | KJ525679 | duck             | China        | SD_DZ        | 2008 |
| VII_d | VII.1.1 | VII.1.1 | VII.1.1 | 1243 | KJ525680 | duck             | China        | SD_LY        | 2009 |
| VII_d | VII.1.1 | VII.1.1 | VII.1.1 | 1244 | KJ525690 | chicken          | China        | SD_YT        | 2013 |
| VII_d | VII.1.1 | VII.1.1 | VII.1.1 | 1245 | KJ525702 | chicken          | China        | SD_KD1       | 2008 |
| VII_d | VII.1.1 | VII.1.1 | VII.1.1 | 1246 | KJ525706 | chicken          | China        | SD_DZ        | 2007 |
| VII_d | VII.1.1 | VII.1.1 | VII.1.1 | 1247 | KJ525717 | chicken          | China        | SD_MH        | 2008 |
| VII_d | VII.1.1 | VII.1.1 | VII.1.1 | 1248 | KJ600785 | chicken          | China        | SD_128       | 2008 |
| VII_d | VII.1.1 | VII.1.1 | VII.1.1 | 1249 | KJ865694 | chicken          | Colombia     | 1326_13207   | 2009 |
| VII_d | VII.1.1 | VII.1.1 | VII.1.1 | 1250 | KJ865699 | chicken          | Colombia     | 1326_13563   | 2009 |
| VII_d | VII.1.1 | VII.1.1 | VII.1.1 | 1251 | KJ865700 | chicken          | Colombia     | 1326_13919   | 2009 |
| VII_d | VII.1.1 | VII.1.1 | VII.1.1 | 1252 | KJ865701 | chicken          | Colombia     | 1326_14301   | 2009 |
| VII_d | VII.1.1 | VII.1.1 | VII.1.1 | 1253 | KJ865706 | fighting_rooster | Colombia     | 2077_26      | 2009 |
| VII_d | VII.1.1 | VII.1.1 | VII.1.1 | 1254 | KJ865707 | chicken          | Colombia     | 2420_06      | 2010 |
| VII_d | VII.1.1 | VII.1.1 | VII.1.1 | 1255 | KJ865713 | chicken          | Colombia     | 5728_17      | 2009 |
| VII_d | VII.1.1 | VII.1.1 | VII.1.1 | 1256 | KJ865715 | chicken          | Colombia     | 12129_14     | 2009 |
| VII_d | VII.1.1 | VII.1.1 | VII.1.1 | 1257 | KJ865717 | chicken          | Colombia     | 14402_17     | 2008 |

|       |         |         |         |      |          |         |                  |                        |      |
|-------|---------|---------|---------|------|----------|---------|------------------|------------------------|------|
| VII_d | VII.1.1 | VII.1.1 | VII.1.1 | 1258 | KJ914673 | chicken | Ukraine          | Ivano_Frankivsk_58     | 2007 |
| VII_d | VII.1.1 | VII.1.1 | VII.1.1 | 1259 | KM885167 | mallard | China            | LGD_1                  | 2005 |
| VII_d | VII.1.1 | VII.1.1 | VII.1.1 | 1260 | KP189357 | mallard | Russia           | Adygea_12              | 2008 |
| VII_d | VII.1.1 | VII.1.1 | VII.1.1 | 1261 | KU140419 | chicken | China            | ck_LHLJ_1_06           | 2006 |
| VII_d | VII.1.1 | VII.1.1 | VII.1.1 | 1262 | KU200249 | goose   | China            | Jilin_SP01             | 2014 |
| VII_d | VII.1.1 | VII.1.1 | VII.1.1 | 1263 | KU200250 | goose   | China            | Jilin_DA05             | 2015 |
| VII_d | VII.1.1 | VII.1.1 | VII.1.1 | 1264 | KU200251 | chicken | China            | Heilongjiang_FY06      | 2015 |
| VII_d | VII.1.1 | VII.1.1 | VII.1.1 | 1265 | KU295450 | chicken | Bulgaria         | Juper                  | 2006 |
| VII_d | VII.1.1 | VII.1.1 | VII.1.1 | 1266 | KU295451 | chicken | Bulgaria         | Moravitsa              | 2007 |
| VII_d | VII.1.1 | VII.1.1 | VII.1.1 | 1267 | KU295452 | chicken | Bulgaria         | Vidno                  | 2007 |
| VII_d | VII.1.1 | VII.1.1 | VII.1.1 | 1268 | KU295453 | chicken | Ukraine          | Kharkiv_66_960         | 2007 |
| VII_d | VII.1.1 | VII.1.1 | VII.1.1 | 1269 | KU295454 | chicken | Ukraine          | Lyubotyn_961           | 2003 |
| VII_d | VII.1.1 | VII.1.1 | VII.1.1 | 1270 | KU295455 | chicken | Ukraine          | Bashtanivske_20_02_962 | 2013 |
| VII_d | VII.1.1 | VII.1.1 | VII.1.1 | 1271 | KU710269 | chicken | Bulgaria         | Vodniansi              | 2006 |
| VII_d | VII.1.1 | VII.1.1 | VII.1.1 | 1272 | KU710271 | chicken | Bulgaria         | Kravoder               | 2007 |
| VII_d | VII.1.1 | VII.1.1 | VII.1.1 | 1273 | KU710272 | chicken | Bulgaria         | Liliashka_Mogila       | 2008 |
| VII_d | VII.1.1 | VII.1.1 | VII.1.1 | 1274 | KU710273 | chicken | Bulgaria         | Kardam                 | 2008 |
| VII_d | VII.1.1 | VII.1.1 | VII.1.1 | 1275 | KU710274 | chicken | Bulgaria         | Kazatsite              | 2008 |
| VII_d | VII.1.1 | VII.1.1 | VII.1.1 | 1276 | KU710275 | chicken | Bulgaria         | Vozhdovo               | 2009 |
| VII_d | VII.1.1 | VII.1.1 | VII.1.1 | 1277 | KU710276 | chicken | Bulgaria         | Mamarchevo             | 2009 |
| VII_d | VII.1.1 | VII.1.1 | VII.1.1 | 1278 | KU710277 | pigeon  | Ukraine          | Simferopol_2_26        | 2011 |
| VII_d | VII.1.1 | VII.1.1 | VII.1.1 | 1279 | KU710278 | chicken | Ukraine          | Lypova_Dolyna          | 2002 |
| VII_d | VII.1.1 | VII.1.1 | VII.1.1 | 1280 | KU710279 | chicken | Ukraine          | Lugansk                | 2003 |
| VII_d | VII.1.1 | VII.1.1 | VII.1.1 | 1281 | KU726619 | mallard | Russia           | Adygea_927             | 2007 |
| VII_d | VII.1.1 | VII.1.1 | VII.1.1 | 1284 | KY404087 | chicken | South_Korea      | KR_005_00              | 2013 |
| VII_e | VII.1.1 | VII.1.1 | VII.1.1 | 1285 | AF162714 | goose   | China_Guangdong_ | GPMY_QY97_1            | 1997 |
| VII_e | VII.1.1 | VII.1.1 | VII.1.1 | 1286 | AF358786 | chicken | Taiwan           | TW                     | 2000 |
| VII_e | VII.1.1 | VII.1.1 | VII.1.1 | 1287 | AF456437 | goose   | China            | GD_1                   | 1998 |
| VII_e | VII.1.1 | VII.1.1 | VII.1.1 | 1288 | AY325799 | -       | -                | YN_C1                  | -    |
| VII_e | VII.1.1 | VII.1.1 | VII.1.1 | 1289 | DQ067447 | chicken | China            | GX1                    | 2000 |
| VII_e | VII.1.1 | VII.1.1 | VII.1.1 | 1290 | DQ363537 | chicken | China            | Shandong_Jlan_04       | 2004 |
| VII_e | VII.1.1 | VII.1.1 | VII.1.1 | 1291 | DQ485256 | chicken | China            | Guangxi2               | 2000 |
| VII_e | VII.1.1 | VII.1.1 | VII.1.1 | 1292 | DQ485258 | chicken | China            | Guangxi4               | 2000 |
| VII_e | VII.1.1 | VII.1.1 | VII.1.1 | 1293 | EF589131 | chicken | China            | P1_Guizhou             | -    |



|       |         |                |         |      |            |             |         |                         |      |
|-------|---------|----------------|---------|------|------------|-------------|---------|-------------------------|------|
| VII_e | VII.1.1 | <b>VII.1.1</b> | VII.1.1 | 1295 | GU332646   | duck        | Vietnam | Long_Bien_78            | 2002 |
| VII_e | VII.1.1 | <b>VII.1.1</b> | VII.1.1 | 1296 | GU332647   | environment | Vietnam | environmental_fecal_480 | 2002 |
| VII_e | VII.1.1 | <b>VII.1.1</b> | VII.1.1 | 1297 | JX193075   | chicken     | China   | Guangxi14               | 2002 |
| VII_e | VII.1.1 | <b>VII.1.1</b> | VII.1.1 | 1298 | KJ782375   | goose       | China   | GD_QY                   | 1997 |
| VII_e | VII.1.1 | <b>VII.1.1</b> | VII.1.1 | 1307 | AB853329   | chicken     | Japan   | Fukushima_NYF_3         | 2002 |
| VII_e | VII.1.1 | <b>VII.1.1</b> | VII.1.1 | 1308 | AB853927   | chicken     | Japan   | Ibaraki_SG106           | 1999 |
| VII_e | VII.1.1 | <b>VII.1.1</b> | VII.1.1 | 1309 | AB853929   | chicken     | Japan   | Miyagi_AGT              | 2002 |
| VII_e | VII.1.1 | <b>VII.1.1</b> | VII.1.1 | 1610 | DQ659677   | goose       | China   | NA1                     | 1999 |
| VII_e | VII.1.1 | <b>VII.1.1</b> | VII.1.1 | 1611 | FJ480822   | goose       | China   | HLJ_1                   | 2006 |
| VII_e | VII.1.1 | <b>VII.1.1</b> | VII.1.1 | 1612 | KJ528559   | goose       | China   | NA_1M                   | 2014 |
| VII_e | VII.1.1 | <b>VII.1.1</b> | VII.1.1 | 1613 | KJ607169   | goose       | China   | LHLJ_1                  | 2006 |
| VII_e | VII.1.1 | <b>VII.1.1</b> | VII.1.1 | 1614 | KU200243   | chicken     | China   | Jilin_LY02              | 2014 |
| VII_e | VII.1.1 | <b>VII.1.1</b> | VII.1.1 | 1615 | KU200244   | chicken     | China   | Jilin_CY01              | 2014 |
| VII_e | VII.1.1 | <b>VII.1.1</b> | VII.1.1 | 1616 | KU200245   | quail       | China   | Jilin_JY02              | 2015 |
| VII_e | VII.1.1 | <b>VII.1.1</b> | VII.1.1 | 1617 | KU200246   | chicken     | China   | Jilin_YJ05              | 2015 |
| VII_e | VII.1.1 | <b>VII.1.1</b> | VII.1.1 | 1618 | KU200247   | pigeon      | China   | Heilongjiang_TL03       | 2015 |
| VII_e | VII.1.1 | <b>VII.1.1</b> | VII.1.1 | 1619 | KU200248   | pigeon      | China   | Heilongjiang_LS03       | 2014 |
| VII_e | VII.1.1 | <b>VII.1.1</b> | VII.1.1 | 1996 | MF278925.1 | chicken     | China   | YF_LD_L                 | 1997 |
| VII_j | VII.1.1 | <b>VII.1.1</b> | VII.1.1 | 1478 | FJ882014   | chicken     | China   | SG_Liaoning             | 2009 |
| VII_j | VII.1.1 | <b>VII.1.1</b> | VII.1.1 | 1479 | JQ013856   | chicken     | China   | JS_02                   | 2011 |
| VII_j | VII.1.1 | <b>VII.1.1</b> | VII.1.1 | 1480 | JQ013860   | chicken     | China   | JS_06                   | 2011 |
| VII_j | VII.1.1 | <b>VII.1.1</b> | VII.1.1 | 1481 | JQ013865   | chicken     | China   | JS_11                   | 2011 |
| VII_j | VII.1.1 | <b>VII.1.1</b> | VII.1.1 | 1482 | JQ013868   | chicken     | China   | JS_14                   | 2011 |
| VII_j | VII.1.1 | <b>VII.1.1</b> | VII.1.1 | 1483 | JQ013870   | chicken     | China   | JS_16                   | 2011 |
| VII_j | VII.1.1 | <b>VII.1.1</b> | VII.1.1 | 1484 | JQ013871   | chicken     | China   | JS_17                   | 2011 |
| VII_j | VII.1.1 | <b>VII.1.1</b> | VII.1.1 | 1485 | JQ013873   | chicken     | China   | JS_19                   | 2011 |
| VII_j | VII.1.1 | <b>VII.1.1</b> | VII.1.1 | 1486 | JQ013877   | chicken     | China   | SD_01                   | 2011 |
| VII_j | VII.1.1 | <b>VII.1.1</b> | VII.1.1 | 1487 | JQ013878   | chicken     | China   | SD_02                   | 2011 |
| VII_j | VII.1.1 | <b>VII.1.1</b> | VII.1.1 | 1488 | JQ015295   | chicken     | China   | SDWF07                  | 2011 |
| VII_j | VII.1.1 | <b>VII.1.1</b> | VII.1.1 | 1489 | JQ015296   | chicken     | China   | SD04                    | 2011 |
| VII_j | VII.1.1 | <b>VII.1.1</b> | VII.1.1 | 1490 | JQ015297   | chicken     | China   | SDYT03                  | 2011 |
| VII_j | VII.1.1 | <b>VII.1.1</b> | VII.1.1 | 1491 | JX840452   | chicken     | China   | SD754                   | 2012 |
| VII_j | VII.1.1 | <b>VII.1.1</b> | VII.1.1 | 1492 | JX840453   | chicken     | China   | SD755                   | 2012 |
| VII_j | VII.1.1 | <b>VII.1.1</b> | VII.1.1 | 1493 | JX840454   | chicken     | China   | SD704                   | 2012 |

|       |         |                |         |      |          |          |        |             |      |
|-------|---------|----------------|---------|------|----------|----------|--------|-------------|------|
| VII_j | VII.1.1 | <b>VII.1.1</b> | VII.1.1 | 1494 | JX840455 | chicken  | China  | SD758       | 2012 |
| VII_j | VII.1.1 | <b>VII.1.1</b> | VII.1.1 | 1495 | KC020114 | chicken  | China  | SDS672      | 2012 |
| VII_j | VII.1.1 | <b>VII.1.1</b> | VII.1.1 | 1496 | KC292519 | chicken  | China  | SDS672      | 2010 |
| VII_j | VII.1.1 | <b>VII.1.1</b> | VII.1.1 | 1497 | KC484655 | chicken  | Israel | Israel_998  | 2011 |
| VII_j | VII.1.1 | <b>VII.1.1</b> | VII.1.1 | 1498 | KC489471 | chicken  | China  | SD834_12    | 2012 |
| VII_j | VII.1.1 | <b>VII.1.1</b> | VII.1.1 | 1499 | KC542905 | chicken  | China  | Liaoning_01 | 2009 |
| VII_j | VII.1.1 | <b>VII.1.1</b> | VII.1.1 | 1500 | KC542906 | chicken  | China  | Hebei_01    | 2010 |
| VII_j | VII.1.1 | <b>VII.1.1</b> | VII.1.1 | 1501 | KC542907 | chicken  | China  | Shandong_02 | 2010 |
| VII_j | VII.1.1 | <b>VII.1.1</b> | VII.1.1 | 1502 | KC542910 | chicken  | China  | Hebei_01    | 2011 |
| VII_j | VII.1.1 | <b>VII.1.1</b> | VII.1.1 | 1503 | KC542911 | chicken  | China  | Beijing_01  | 2009 |
| VII_j | VII.1.1 | <b>VII.1.1</b> | VII.1.1 | 1504 | KC542912 | chicken  | China  | Shandong_01 | 2012 |
| VII_j | VII.1.1 | <b>VII.1.1</b> | VII.1.1 | 1505 | KF055273 | chicken  | China  | SD01        | 2013 |
| VII_j | VII.1.1 | <b>VII.1.1</b> | VII.1.1 | 1506 | KF306265 | wildfowl | China  | SF2         | 2010 |
| VII_j | VII.1.1 | <b>VII.1.1</b> | VII.1.1 | 1507 | KF771883 | duck     | China  | LC          | 2012 |
| VII_j | VII.1.1 | <b>VII.1.1</b> | VII.1.1 | 1508 | KF792022 | pheasant | Israel | 746_828     | 2013 |
| VII_j | VII.1.1 | <b>VII.1.1</b> | VII.1.1 | 1509 | KF935230 | chicken  | China  | YT          | 2011 |
| VII_j | VII.1.1 | <b>VII.1.1</b> | VII.1.1 | 1510 | KJ136258 | chicken  | China  | JLJT        | 2012 |
| VII_j | VII.1.1 | <b>VII.1.1</b> | VII.1.1 | 1511 | KJ136259 | duck     | China  | JLQG        | 2013 |
| VII_j | VII.1.1 | <b>VII.1.1</b> | VII.1.1 | 1512 | KJ136260 | goose    | China  | JLCC        | 2012 |
| VII_j | VII.1.1 | <b>VII.1.1</b> | VII.1.1 | 1513 | KJ136261 | pigeon   | China  | JLDH        | 2013 |
| VII_j | VII.1.1 | <b>VII.1.1</b> | VII.1.1 | 1514 | KJ184575 | chicken  | China  | JS_05       | 2012 |
| VII_j | VII.1.1 | <b>VII.1.1</b> | VII.1.1 | 1515 | KJ184576 | chicken  | China  | JS_06       | 2012 |
| VII_j | VII.1.1 | <b>VII.1.1</b> | VII.1.1 | 1516 | KJ184577 | chicken  | China  | JS_07       | 2012 |
| VII_j | VII.1.1 | <b>VII.1.1</b> | VII.1.1 | 1517 | KJ184578 | chicken  | China  | JS_08       | 2012 |
| VII_j | VII.1.1 | <b>VII.1.1</b> | VII.1.1 | 1518 | KJ184581 | chicken  | China  | JS_11       | 2012 |
| VII_j | VII.1.1 | <b>VII.1.1</b> | VII.1.1 | 1520 | KJ184586 | chicken  | China  | JS_17       | 2012 |
| VII_j | VII.1.1 | <b>VII.1.1</b> | VII.1.1 | 1521 | KJ184587 | chicken  | China  | JS_18       | 2012 |
| VII_j | VII.1.1 | <b>VII.1.1</b> | VII.1.1 | 1522 | KJ184588 | chicken  | China  | JS_19       | 2012 |
| VII_j | VII.1.1 | <b>VII.1.1</b> | VII.1.1 | 1523 | KJ184589 | chicken  | China  | JS_20       | 2012 |
| VII_j | VII.1.1 | <b>VII.1.1</b> | VII.1.1 | 1524 | KJ184592 | chicken  | China  | JS_23       | 2012 |
| VII_j | VII.1.1 | <b>VII.1.1</b> | VII.1.1 | 1525 | KJ184593 | chicken  | China  | JS_24       | 2012 |
| VII_j | VII.1.1 | <b>VII.1.1</b> | VII.1.1 | 1526 | KJ184594 | chicken  | China  | SD_01       | 2012 |
| VII_j | VII.1.1 | <b>VII.1.1</b> | VII.1.1 | 1527 | KJ184595 | chicken  | China  | SD_02       | 2012 |
| VII_j | VII.1.1 | <b>VII.1.1</b> | VII.1.1 | 1528 | KJ184596 | chicken  | China  | SD_03       | 2012 |

|       |         |                |         |      |          |         |        |              |      |
|-------|---------|----------------|---------|------|----------|---------|--------|--------------|------|
| VII_j | VII.1.1 | <b>VII.1.1</b> | VII.1.1 | 1529 | KJ184597 | chicken | China  | AH_02        | 2012 |
| VII_j | VII.1.1 | <b>VII.1.1</b> | VII.1.1 | 1530 | KJ450978 | chicken | China  | Ningxia_S006 | 2013 |
| VII_j | VII.1.1 | <b>VII.1.1</b> | VII.1.1 | 1531 | KJ450980 | chicken | Chian  | Sichuan_1125 | 2013 |
| VII_j | VII.1.1 | <b>VII.1.1</b> | VII.1.1 | 1532 | KJ525670 | chicken | China  | SD_SH1       | 2011 |
| VII_j | VII.1.1 | <b>VII.1.1</b> | VII.1.1 | 1533 | KJ525686 | chicken | China  | SD_YS        | 2010 |
| VII_j | VII.1.1 | <b>VII.1.1</b> | VII.1.1 | 1534 | KJ525688 | chicken | China  | SD_YT        | 2011 |
| VII_j | VII.1.1 | <b>VII.1.1</b> | VII.1.1 | 1535 | KJ525689 | chicken | China  | SD_ZJ        | 2012 |
| VII_j | VII.1.1 | <b>VII.1.1</b> | VII.1.1 | 1536 | KJ525691 | chicken | China  | SD_YS1       | 2012 |
| VII_j | VII.1.1 | <b>VII.1.1</b> | VII.1.1 | 1537 | KJ525693 | chicken | China  | SD_YG        | 2013 |
| VII_j | VII.1.1 | <b>VII.1.1</b> | VII.1.1 | 1538 | KJ525694 | chicken | China  | SD_XT1       | 2012 |
| VII_j | VII.1.1 | <b>VII.1.1</b> | VII.1.1 | 1539 | KJ525695 | chicken | China  | SD_XT        | 2011 |
| VII_j | VII.1.1 | <b>VII.1.1</b> | VII.1.1 | 1540 | KJ525696 | chicken | China  | SD_WF        | 2012 |
| VII_j | VII.1.1 | <b>VII.1.1</b> | VII.1.1 | 1541 | KJ525699 | chicken | China  | SD_LQ        | 2011 |
| VII_j | VII.1.1 | <b>VII.1.1</b> | VII.1.1 | 1542 | KJ525704 | chicken | China  | SD_HZ        | 2012 |
| VII_j | VII.1.1 | <b>VII.1.1</b> | VII.1.1 | 1543 | KJ525705 | chicken | China  | SD_HZ        | 2011 |
| VII_j | VII.1.1 | <b>VII.1.1</b> | VII.1.1 | 1544 | KJ525707 | chicken | China  | SD_XT2       | 2012 |
| VII_j | VII.1.1 | <b>VII.1.1</b> | VII.1.1 | 1545 | KJ525708 | chicken | China  | SD_CP        | 2012 |
| VII_j | VII.1.1 | <b>VII.1.1</b> | VII.1.1 | 1546 | KJ525712 | chicken | China  | SD_MH10      | 2011 |
| VII_j | VII.1.1 | <b>VII.1.1</b> | VII.1.1 | 1547 | KJ525714 | chicken | China  | SD_MH5       | 2011 |
| VII_j | VII.1.1 | <b>VII.1.1</b> | VII.1.1 | 1548 | KJ525715 | chicken | China  | SD_MH4       | 2011 |
| VII_j | VII.1.1 | <b>VII.1.1</b> | VII.1.1 | 1549 | KJ567597 | chicken | China  | SDZB11       | 2013 |
| VII_j | VII.1.1 | <b>VII.1.1</b> | VII.1.1 | 1550 | KJ825878 | chicken | China  | Guangxi_D2   | 2012 |
| VII_j | VII.1.1 | <b>VII.1.1</b> | VII.1.1 | 1551 | KM016457 | chicken | Israel | 159          | 2014 |
| VII_j | VII.1.1 | <b>VII.1.1</b> | VII.1.1 | 1552 | KM016458 | chicken | Israel | 160          | 2014 |
| VII_j | VII.1.1 | <b>VII.1.1</b> | VII.1.1 | 1553 | KM016459 | chicken | Israel | 180          | 2014 |
| VII_j | VII.1.1 | <b>VII.1.1</b> | VII.1.1 | 1554 | KP064014 | chicken | China  | JS_21        | 2013 |
| VII_j | VII.1.1 | <b>VII.1.1</b> | VII.1.1 | 1555 | KP064015 | chicken | China  | JS_22        | 2013 |
| VII_j | VII.1.1 | <b>VII.1.1</b> | VII.1.1 | 1556 | KP064016 | chicken | China  | JS_23        | 2013 |
| VII_j | VII.1.1 | <b>VII.1.1</b> | VII.1.1 | 1557 | KP064017 | chicken | China  | JS_24        | 2013 |
| VII_j | VII.1.1 | <b>VII.1.1</b> | VII.1.1 | 1558 | KP064018 | chicken | China  | JS_27        | 2013 |
| VII_j | VII.1.1 | <b>VII.1.1</b> | VII.1.1 | 1559 | KP064019 | chicken | China  | SD_25        | 2013 |
| VII_j | VII.1.1 | <b>VII.1.1</b> | VII.1.1 | 1560 | KP064020 | chicken | China  | JS_30        | 2013 |
| VII_j | VII.1.1 | <b>VII.1.1</b> | VII.1.1 | 1562 | KT804693 | chicken | Israel | 318_IS       | 2015 |
| VII_j | VII.1.1 | <b>VII.1.1</b> | VII.1.1 | 1563 | KU200253 | chicken | China  | Jilin_YJ06   | 2015 |

|       |         |                |         |      |            |         |        |             |      |
|-------|---------|----------------|---------|------|------------|---------|--------|-------------|------|
| VII_j | VII.1.1 | <b>VII.1.1</b> | VII.1.1 | 1564 | KU365650   | chicken | Egypt  | FU4_NLQP    | 2014 |
| VII_j | VII.1.1 | <b>VII.1.1</b> | VII.1.1 | 1565 | KU365651   | chicken | Egypt  | FU8_NLQP    | 2014 |
| VII_j | VII.1.1 | <b>VII.1.1</b> | VII.1.1 | 1566 | KU365652   | chicken | Egypt  | FU13_NLQP   | 2014 |
| VII_j | VII.1.1 | <b>VII.1.1</b> | VII.1.1 | 1567 | KU365653   | chicken | Egypt  | FU5_NLQP    | 2014 |
| VII_j | VII.1.1 | <b>VII.1.1</b> | VII.1.1 | 1568 | KU933948   | duck    | China  | Guizhou_ZY  | 2014 |
| VII_j | VII.1.1 | <b>VII.1.1</b> | VII.1.1 | 1569 | KU933949   | duck    | China  | Guizhou_SS2 | 2015 |
| VII_j | VII.1.1 | <b>VII.1.1</b> | VII.1.1 | 1570 | KU933950   | duck    | China  | Guizhou_TZ  | 2015 |
| VII_j | VII.1.1 | <b>VII.1.1</b> | VII.1.1 | 1571 | KX580300.1 | chicken | Israel | 1421        | 2015 |
| VII_j | VII.1.1 | <b>VII.1.1</b> | VII.1.1 | 1572 | KX686722.1 |         | Egypt  | ISM_460F    | 2013 |
| VII_j | VII.1.1 | <b>VII.1.1</b> | VII.1.1 | 1573 | KX686723.1 |         | Egypt  | KFR_B7      | 2012 |
| VII_j | VII.1.1 | <b>VII.1.1</b> | VII.1.1 | 1574 | KX686725.1 |         | Egypt  | GZ_339F     | 2015 |
| VII_j | VII.1.1 | <b>VII.1.1</b> | VII.1.1 | 1575 | KX686724.1 |         | Egypt  | EG_35       | 2014 |
| VII_j | VII.1.1 | <b>VII.1.1</b> | VII.1.1 | 1576 | KX686726.1 |         | Egypt  | BEH_261F    | 2014 |
| VII_j | VII.1.1 | <b>VII.1.1</b> | VII.1.1 | 1577 | KX686727.1 |         | Egypt  | GZ_986F     | 2015 |
| VII_j | VII.1.1 | <b>VII.1.1</b> | VII.1.1 | 1578 | KX686728.1 |         | Egypt  | GHB_328F    | 2016 |
| VII_j | VII.1.1 | <b>VII.1.1</b> | VII.1.1 | 1579 | KY073880.1 | chicken | Israel | IS_266      | 2016 |
| VII_j | VII.1.1 | <b>VII.1.1</b> | VII.1.1 | 1580 | KY075880   | chicken | Egypt  | Sharkia7    | 2016 |
| VII_j | VII.1.1 | <b>VII.1.1</b> | VII.1.1 | 1581 | KY075881   | chicken | Egypt  | Ismailia8   | 2016 |
| VII_j | VII.1.1 | <b>VII.1.1</b> | VII.1.1 | 1582 | KY075882   | chicken | Egypt  | Damietta9   | 2016 |
| VII_j | VII.1.1 | <b>VII.1.1</b> | VII.1.1 | 1583 | KY075883   | chicken | Egypt  | Sharkia10   | 2016 |
| VII_j | VII.1.1 | <b>VII.1.1</b> | VII.1.1 | 1584 | KY075884   | chicken | Egypt  | Qualyobia11 | 2016 |
| VII_j | VII.1.1 | <b>VII.1.1</b> | VII.1.1 | 1585 | KY075885   | chicken | Egypt  | Qualyobia12 | 2016 |
| VII_j | VII.1.1 | <b>VII.1.1</b> | VII.1.1 | 1586 | KY075886   | chicken | Egypt  | Sharkia14   | 2016 |
| VII_j | VII.1.1 | <b>VII.1.1</b> | VII.1.1 | 1587 | KY075887   | chicken | Egypt  | El_Arish15  | 2016 |
| VII_j | VII.1.1 | <b>VII.1.1</b> | VII.1.1 | 1588 | KY075888   | chicken | Egypt  | El_Arish16  | 2016 |
| VII_j | VII.1.1 | <b>VII.1.1</b> | VII.1.1 | 1589 | KY075889   | chicken | Egypt  | Qualyobia26 | 2016 |
| VII_j | VII.1.1 | <b>VII.1.1</b> | VII.1.1 | 1590 | KY075890   | chicken | Egypt  | Dakahlia27  | 2016 |
| VII_j | VII.1.1 | <b>VII.1.1</b> | VII.1.1 | 1591 | KY075891   | chicken | Egypt  | Dakahlia28  | 2016 |
| VII_j | VII.1.1 | <b>VII.1.1</b> | VII.1.1 | 1592 | KY075892   | chicken | Egypt  | Ismailia29  | 2016 |
| VII_j | VII.1.1 | <b>VII.1.1</b> | VII.1.1 | 1593 | KY075895   | chicken | Egypt  | Ismailia32  | 2016 |
| VII_j | VII.1.1 | <b>VII.1.1</b> | VII.1.1 | 1595 | KY510685.1 | chicken | Israel | 428         | 2016 |
| VII_j | VII.1.1 | <b>VII.1.1</b> | VII.1.1 | 1596 | KY510687.1 | chicken | Israel | 2           | 2017 |
| VII_j | VII.1.1 | <b>VII.1.1</b> | VII.1.1 | 1597 | KY510688.1 | chicken | Israel | 27          | 2017 |
| VII_j | VII.1.1 | <b>VII.1.1</b> | VII.1.1 | 1598 | KY510689.1 | chicken | Israel | 28          | 2017 |

|       |         |         |         |      |            |                      |            |            |      |
|-------|---------|---------|---------|------|------------|----------------------|------------|------------|------|
| VII_j | VII.1.1 | VII.1.1 | VII.1.1 | 1599 | KY968651.1 | chicken              | Israel     | IS_222     | 2017 |
| VII_j | VII.1.1 | VII.1.1 | VII.1.1 | 1600 | MF049232.1 | chicken              | Israel     | IS_195     | 2017 |
| VII_j | VII.1.1 | VII.1.1 | VII.1.1 | 1601 | MF686923.1 | chicken              | Israel     | IS_235     | 2011 |
| VII_l | VII.1.1 | VII.1.1 | VII.1.1 | 1282 | KX268351   | chicken              | Iran       | Behshahr   | 2015 |
| VII_l | VII.1.1 | VII.1.1 | VII.1.1 | 1986 | KU201408   | chicken              | Iran       | SMV_1      | 2011 |
| VII_l | VII.1.1 | VII.1.1 | VII.1.1 | 1987 | KU201409   | chicken              | Iran       | SMV_2      | 2011 |
| VII_l | VII.1.1 | VII.1.1 | VII.1.1 | 1988 | KU201410   | chicken              | Iran       | SMV_3      | 2011 |
| VII_l | VII.1.1 | VII.1.1 | VII.1.1 | 1989 | KU201411   | chicken              | Iran       | SMV_4      | 2012 |
| VII_l | VII.1.1 | VII.1.1 | VII.1.1 | 1990 | KU201412   | chicken              | Iran       | SMV_5      | 2012 |
| VII_l | VII.1.1 | VII.1.1 | VII.1.1 | 1991 | KU201413   | chicken              | Iran       | SMV_6      | 2012 |
| VII_l | VII.1.1 | VII.1.1 | VII.1.1 | 1992 | KU201414   | chicken              | Iran       | SMV_7      | 2013 |
| VII_l | VII.1.1 | VII.1.1 | VII.1.1 | 1993 | KU201415   | chicken              | Iran       | SMV_8      | 2013 |
| VII_d | VII.1.1 | VII.1.1 | VII.1.1 | 2032 | KY776610.1 | white_fronted_goose  | China      | HLJ052     | 2006 |
| VII_b | VII.1.1 | VII.1.1 | VII.1.1 | 2033 | KY776609.1 | mandarin_duck        | China      | JL01       | 2007 |
| VII_d | VII.1.1 | VII.1.1 | VII.1.1 | 2034 | KY776608.1 | wild_bird            | China      | HLJ001     | 2006 |
| VII_b | VII.1.1 | VII.1.1 | VII.1.1 | 2035 | KY776607.1 | Long_eared_owl       | China      | HLJ012     | 2006 |
| VII_b | VII.1.1 | VII.1.1 | VII.1.1 | 2036 | KY776606.1 | Mandarin_duck        | China      | HLJ016     | 2006 |
| VII_d | VII.1.1 | VII.1.1 | VII.1.1 | 2037 | KY776605.1 | Mandarin_dcuk        | China      | HLJ028     | 2006 |
| VII_d | VII.1.1 | VII.1.1 | VII.1.1 | 2041 | KY776601.1 | mallard              | China      | HLJ361     | 2005 |
| VII_b | VII.1.1 | VII.1.1 | VII.1.1 | 2042 | KY776600.1 | mallard              | China      | HLJ355     | 2006 |
| VII_b | VII.1.1 | VII.1.1 | VII.1.1 | 2045 | KY776593.1 | Rough_legged_Buzzard | China      | HLJ013     | 2006 |
| VII_b | VII.1.1 | VII.1.1 | VII.1.1 | 2046 | KY776592.1 | Rough_legged_Buzzard | China      | HLJ09      | 2006 |
| VII_b | VII.1.1 | VII.1.1 | VII.1.1 | 2047 | KY776591.1 | Japanese_sparrowhawk | China      | HLJ070     | 2006 |
| VII_d | VII.1.1 | VII.1.1 | VII.1.1 | 2051 | MG867723.1 | chicken              | China      | G7         | 2008 |
| VII_b | VII.1.1 | VII.1.1 | VII.1.1 | 2055 | MG976930.1 | Blyths_reed_warbler  | Kazakhstan | Almaty_59  | 2014 |
| VII_d | VII.1.1 | VII.1.1 | VII.1.1 | 2066 | KX765177.1 | duck                 | China      | DU_FJCL117 | 2011 |
| VII_d | VII.1.1 | VII.1.1 | VII.1.1 | 2067 | KX765178.1 | duck                 | China      | DU_JXNC35  | 2012 |
| VII_b | VII.1.1 | VII.1.1 | VII.1.1 | 2138 | MG869266.1 | chicken              | Vietnam    | NCXCP      | 2011 |
| VII_b | VII.1.1 | VII.1.1 | VII.1.1 | 2139 | MG869267.1 | chicken              | Vietnam    | NDVHN14    | 2014 |
| VII_d | VII.1.1 | VII.1.1 | VII.1.1 | 2153 | MH371022.1 | chicken              | Israel     | PHL1818    | 2007 |
| VII_j | VII.1.1 | VII.1.1 | VII.1.1 | 2154 | MH371023.1 | chicken              | Israel     | PHL120809  | 2011 |
| VII_j | VII.1.1 | VII.1.1 | VII.1.1 | 2156 | MH371025.1 | chicken              | Israel     | PHL141353  | 2011 |
| VII_j | VII.1.1 | VII.1.1 | VII.1.1 | 2159 | MH371028.1 | chicken              | Israel     | PHL120423  | 2011 |
| VII_d | VII.1.1 | VII.1.1 | VII.1.1 | 2163 | MH371032.1 | chicken              | Israel     | PHL11278   | 2011 |

|       |         |                |         |      |            |         |        |           |      |
|-------|---------|----------------|---------|------|------------|---------|--------|-----------|------|
| VII_j | VII.1.1 | <b>VII.1.1</b> | VII.1.1 | 2164 | MH371033.1 | chicken | Israel | PHL137495 | 2011 |
| VII_j | VII.1.1 | <b>VII.1.1</b> | VII.1.1 | 2169 | MH371038.1 | chicken | Israel | PHL122509 | 2011 |
| VII_j | VII.1.1 | <b>VII.1.1</b> | VII.1.1 | 2170 | MH371039.1 | chicken | Israel | PHL137569 | 2011 |
| VII_d | VII.1.1 | <b>VII.1.1</b> | VII.1.1 | 2171 | MH371040.1 | chicken | Israel | PHL99188  | 2010 |
| VII_j | VII.1.1 | <b>VII.1.1</b> | VII.1.1 | 2175 | MH371044.1 | chicken | Israel | PHL125877 | 2011 |
| VII_j | VII.1.1 | <b>VII.1.1</b> | VII.1.1 | 2176 | MH371045.1 | chicken | Israel | PHL118279 | 2011 |
| VII_d | VII.1.1 | <b>VII.1.1</b> | VII.1.1 | 2178 | MH371047.1 | chicken | Israel | PHL114112 | 2010 |
| VII_j | VII.1.1 | <b>VII.1.1</b> | VII.1.1 | 2179 | MH371048.1 | chicken | Israel | PHL173849 | 2013 |
| VII_j | VII.1.1 | <b>VII.1.1</b> | VII.1.1 | 2192 | MH371061.1 | chicken | Israel | PHL116035 | 2011 |
| VII_j | VII.1.1 | <b>VII.1.1</b> | VII.1.1 | 2194 | MH371063.1 | chicken | Israel | PHL232809 | 2015 |
| VII_j | VII.1.1 | <b>VII.1.1</b> | VII.1.1 | 2195 | MH371064.1 | chicken | Israel | PHL253633 | 2016 |
| VII_j | VII.1.1 | <b>VII.1.1</b> | VII.1.1 | 2196 | MH371065.1 | turkey  | Israel | PHL245632 | 2016 |
| VII_j | VII.1.1 | <b>VII.1.1</b> | VII.1.1 | 2199 | MH371068.1 | chicken | Israel | PHL153812 | 2012 |
| VII_j | VII.1.1 | <b>VII.1.1</b> | VII.1.1 | 2200 | MH371069.1 | chicken | Israel | PHL156916 | 2012 |
| VII_j | VII.1.1 | <b>VII.1.1</b> | VII.1.1 | 2202 | MH371071.1 | chicken | Israel | PHL169730 | 2013 |
| VII_j | VII.1.1 | <b>VII.1.1</b> | VII.1.1 | 2204 | MH371073.1 | chicken | Israel | PHL201029 | 2014 |
| VII_j | VII.1.1 | <b>VII.1.1</b> | VII.1.1 | 2206 | MH371075.1 | chicken | Israel | PHL203762 | 2014 |
| VII_j | VII.1.1 | <b>VII.1.1</b> | VII.1.1 | 2209 | MH371078.1 | chicken | Israel | PHL207436 | 2014 |
| VII_j | VII.1.1 | <b>VII.1.1</b> | VII.1.1 | 2210 | MH371079.1 | chicken | Israel | PHL209108 | 2014 |
| VII_j | VII.1.1 | <b>VII.1.1</b> | VII.1.1 | 2212 | MH371081.1 | chicken | Israel | PHL218637 | 2014 |
| VII_j | VII.1.1 | <b>VII.1.1</b> | VII.1.1 | 2215 | MH371084.1 | chicken | Israel | PHL223759 | 2015 |
| VII_j | VII.1.1 | <b>VII.1.1</b> | VII.1.1 | 2231 | MH371100.1 | chicken | Israel | PHL208243 | 2014 |
| VII_d | VII.1.1 | <b>VII.1.1</b> | VII.1.1 | 2234 | MH377246.1 | chicken | Israel | PHL34617  | 2008 |
| VII_d | VII.1.1 | <b>VII.1.1</b> | VII.1.1 | 2238 | MH377250.1 | pigeon  | Israel | PHL76558  | 2009 |
| VII_d | VII.1.1 | <b>VII.1.1</b> | VII.1.1 | 2239 | MH377251.1 | chicken | Israel | PHL87809  | 2010 |
| VII_d | VII.1.1 | <b>VII.1.1</b> | VII.1.1 | 2240 | MH377252.1 | chicken | Israel | PHL88629  | 2010 |
| VII_d | VII.1.1 | <b>VII.1.1</b> | VII.1.1 | 2241 | MH377253.1 | chicken | Israel | PHL95252  | 2010 |
| VII_d | VII.1.1 | <b>VII.1.1</b> | VII.1.1 | 2242 | MH377254.1 |         | Israel | PHL95493  | 2010 |
| VII_d | VII.1.1 | <b>VII.1.1</b> | VII.1.1 | 2243 | MH377255.1 |         | Israel | PHL97202  | 2010 |
| VII_j | VII.1.1 | <b>VII.1.1</b> | VII.1.1 | 2245 | MH377257.1 | chicken | Israel | PHL117244 | 2011 |
| VII_j | VII.1.1 | <b>VII.1.1</b> | VII.1.1 | 2246 | MH377258.1 | chicken | Israel | PHL119228 | 2011 |
| VII_j | VII.1.1 | <b>VII.1.1</b> | VII.1.1 | 2247 | MH377259.1 | chicken | Israel | PHL121082 | 2011 |
| VII_j | VII.1.1 | <b>VII.1.1</b> | VII.1.1 | 2248 | MH377260.1 | chicken | Israel | PHL121551 | 2011 |
| VII_j | VII.1.1 | <b>VII.1.1</b> | VII.1.1 | 2249 | MH377261.1 | chicken | Israel | PHL125051 | 2011 |

|       |         |                |         |      |            |                     |        |           |      |
|-------|---------|----------------|---------|------|------------|---------------------|--------|-----------|------|
| VII_j | VII.1.1 | <b>VII.1.1</b> | VII.1.1 | 2250 | MH377262.1 | chicken             | Israel | PHL141932 | 2012 |
| VII_j | VII.1.1 | <b>VII.1.1</b> | VII.1.1 | 2252 | MH377264.1 | chicken             | Israel | PHL145002 | 2012 |
| VII_j | VII.1.1 | <b>VII.1.1</b> | VII.1.1 | 2253 | MH377265.1 | turkey              | Israel | PHL149777 | 2012 |
| VII_j | VII.1.1 | <b>VII.1.1</b> | VII.1.1 | 2256 | MH377268.1 | turkey              | Israel | PHL173633 | 2013 |
| VII_d | VII.1.1 | <b>VII.1.1</b> | VII.1.1 | 2258 | MH377270.1 | chicken             | Israel | PHL2041   | 2007 |
| VII_d | VII.1.1 | <b>VII.1.1</b> | VII.1.1 | 2259 | MH377271.1 | chicken             | Israel | PHL5869   | 2007 |
| VII_d | VII.1.1 | <b>VII.1.1</b> | VII.1.1 | 2260 | MH377272.1 | chicken             | Israel | PHL9273   | 2007 |
| VII_d | VII.1.1 | <b>VII.1.1</b> | VII.1.1 | 2261 | MH377273.1 | chicken             | Israel | PHL11365  | 2007 |
| VII_j | VII.1.1 | <b>VII.1.1</b> | VII.1.1 | 2262 | MH377274.1 | chicken             | Israel | PHL124027 | 2011 |
| VII_d | VII.1.1 | <b>VII.1.1</b> | VII.1.1 | 2263 | MH377275.1 | chicken             | Israel | PHL23536  | 2007 |
| VII_d | VII.1.1 | <b>VII.1.1</b> | VII.1.1 | 2264 | MH377276.1 | turkey              | Israel | PHL24317  | 2007 |
| VII_d | VII.1.1 | <b>VII.1.1</b> | VII.1.1 | 2265 | MH377277.1 | chicken             | Israel | PHL24639  | 2007 |
| VII_d | VII.1.1 | <b>VII.1.1</b> | VII.1.1 | 2267 | MH377279.1 | chicken             | Israel | PHL27571  | 2007 |
| VII_d | VII.1.1 | <b>VII.1.1</b> | VII.1.1 | 2268 | MH377280.1 | chicken             | Israel | PHL17222  | 2007 |
| VII_d | VII.1.1 | <b>VII.1.1</b> | VII.1.1 | 2271 | MH377283.1 | chicken             | Israel | PHL24993  | 2007 |
| VII_j | VII.1.1 | <b>VII.1.1</b> | VII.1.1 | 2272 | MH377284.1 | chicken             | Israel | PHL151347 | 2012 |
| VII_j | VII.1.1 | <b>VII.1.1</b> | VII.1.1 | 2274 | MH377286.1 | chicken             | Israel | PHL223397 | 2015 |
| VII_j | VII.1.1 | <b>VII.1.1</b> | VII.1.1 | 2275 | MH377287.1 | chicken             | Israel | PHL238651 | 2015 |
| VII_j | VII.1.1 | <b>VII.1.1</b> | VII.1.1 | 2276 | MH377288.1 |                     | Israel | PHL204642 | 2014 |
| VII_j | VII.1.1 | <b>VII.1.1</b> | VII.1.1 | 2279 | MH377291.1 | chicken             | Israel | PHL251453 | 2016 |
| VII_j | VII.1.1 | <b>VII.1.1</b> | VII.1.1 | 2281 | MH377293.1 | chicken             | Israel | PHL251747 | 2016 |
| VII_j | VII.1.1 | <b>VII.1.1</b> | VII.1.1 | 2282 | MH377294.1 | chicken             | Israel | PHL253817 | 2016 |
| VII_j | VII.1.1 | <b>VII.1.1</b> | VII.1.1 | 2284 | MH377296.1 | chicken             | Israel | PHL256987 | 2016 |
| VII_j | VII.1.1 | <b>VII.1.1</b> | VII.1.1 | 2285 | MH377297.1 | turkey              | Israel | PHL257758 | 2016 |
| VII_j | VII.1.1 | <b>VII.1.1</b> | VII.1.1 | 2289 | MH377301.1 | long_legged_buzzard | Israel | PHL264751 | 2011 |
| VII_j | VII.1.1 | <b>VII.1.1</b> | VII.1.1 | 2293 | MH377305.1 | common_kestrel      | Israel | PHL264758 | 2015 |
| VII_j | VII.1.1 | <b>VII.1.1</b> | VII.1.1 | 2294 | MH377306.1 | chicken             | Israel | PHL246332 | 2016 |
| VII_j | VII.1.1 | <b>VII.1.1</b> | VII.1.1 | 2295 | MH377307.1 | chicken             | Israel | PHL249275 | 2016 |
| VII_j | VII.1.1 | <b>VII.1.1</b> | VII.1.1 | 2296 | MH377308.1 | chicken             | Israel | PHL251542 | 2016 |
| VII_j | VII.1.1 | <b>VII.1.1</b> | VII.1.1 | 2297 | MH377309.1 | turkey              | Israel | PHL255913 | 2016 |
| VII_d | VII.1.1 | <b>VII.1.1</b> | VII.1.1 | 2298 | MH377310.1 |                     | Israel | PHL104477 | 2010 |
| VII_j | VII.1.1 | <b>VII.1.1</b> | VII.1.1 | 2300 | MH377312.1 | chicken             | Israel | PHL265941 | 2016 |
| VII_j | VII.1.1 | <b>VII.1.1</b> | VII.1.1 | 2301 | MH377313.1 | chicken             | Israel | PHL265559 | 2016 |
| VII_j | VII.1.1 | <b>VII.1.1</b> | VII.1.1 | 2302 | MH377314.1 | chicken             | Israel | PHL266018 | 2016 |

|       |         |                |         |      |            |                |        |                             |      |
|-------|---------|----------------|---------|------|------------|----------------|--------|-----------------------------|------|
| VII_j | VII.1.1 | <b>VII.1.1</b> | VII.1.1 | 2303 | MH377315.1 | lesser_kestrel | Israel | PHL264759                   | 2012 |
| VII_j | VII.1.1 | <b>VII.1.1</b> | VII.1.1 | 2305 | MH377317.1 | chicken        | Israel | PHL142551                   | 2012 |
| VII_j | VII.1.1 | <b>VII.1.1</b> | VII.1.1 | 2313 | MH377325.1 | chicken        | Israel | PHL203308                   | 2014 |
| VII_j | VII.1.1 | <b>VII.1.1</b> | VII.1.1 | 2439 | MK005975   | chicken        | Egypt  | Sohag_1_1012                | 2011 |
| VII_j | VII.1.1 | <b>VII.1.1</b> | VII.1.1 | 2440 | MK005976   | chicken        | Egypt  | Sohag_13_1015               | 2011 |
| VII_j | VII.1.1 | <b>VII.1.1</b> | VII.1.1 | 2443 | MK005979   | chicken        | Egypt  | Sohag_21_1023               | 2011 |
| VII_j | VII.1.1 | <b>VII.1.1</b> | VII.1.1 | 2444 | MK005980   | chicken        | Egypt  | Sohag_61_1027               | 2011 |
| VII_j | VII.1.1 | <b>VII.1.1</b> | VII.1.1 | 2445 | MK005981   | chicken        | Egypt  | Sohag_66_1030               | 2011 |
| VII_j | VII.1.1 | <b>VII.1.1</b> | VII.1.1 | 2446 | MK005982   | chicken        | Egypt  | Sohag_67_1031               | 2011 |
| VII_j | VII.1.1 | <b>VII.1.1</b> | VII.1.1 | 2447 | MK005983   | chicken        | Egypt  | Sohag_68_1032               | 2011 |
| VII_j | VII.1.1 | <b>VII.1.1</b> | VII.1.1 | 2449 | MK005985   | chicken        | Egypt  | Luxor_83_1035               | 2011 |
| VII_j | VII.1.1 | <b>VII.1.1</b> | VII.1.1 | 2450 | MK005986   | chicken        | Egypt  | Qena_101_1036               | 2012 |
| VII_j | VII.1.1 | <b>VII.1.1</b> | VII.1.1 | 2451 | MK005987   | chicken        | Egypt  | Qena_103_1037               | 2012 |
| VII_j | VII.1.1 | <b>VII.1.1</b> | VII.1.1 | 2452 | MK005988   | chicken        | Egypt  | Qena_105_1039               | 2012 |
| VII_j | VII.1.1 | <b>VII.1.1</b> | VII.1.1 | 2453 | MK005989   | chicken        | Egypt  | Qena_108_1041               | 2012 |
| VII_j | VII.1.1 | <b>VII.1.1</b> | VII.1.1 | 2455 | MK005991   | chicken        | Egypt  | Qena_140_1048               | 2012 |
| VII_j | VII.1.1 | <b>VII.1.1</b> | VII.1.1 | 2456 | MK005992   | chicken        | Egypt  | Qena_141_1049               | 2012 |
| VII_j | VII.1.1 | <b>VII.1.1</b> | VII.1.1 | 2457 | MK005993   | chicken        | Egypt  | Qena_144_1052               | 2012 |
| VII_j | VII.1.1 | <b>VII.1.1</b> | VII.1.1 | 2458 | MK005995   | pigeon         | Egypt  | Souqal_Cairo_19_CL_G3_1090  | 2015 |
| VII_j | VII.1.1 | <b>VII.1.1</b> | VII.1.1 | 2459 | MK005996   | pigeon         | Egypt  | Souqal_Cairo_27_OP_G9_1091  | 2015 |
| VII_j | VII.1.1 | <b>VII.1.1</b> | VII.1.1 | 2460 | MK005997   | pigeon         | Egypt  | Souqal_Cairo_28_OP_G27_1109 | 2015 |
| VII_j | VII.1.1 | <b>VII.1.1</b> | VII.1.1 | 2461 | MK005998   | pigeon         | Egypt  | Giza_15_CL_PG_1095          | 2015 |
| VII_j | VII.1.1 | <b>VII.1.1</b> | VII.1.1 | 2483 | MG717683.1 | quail          | Egypt  | SDU_2                       | 2016 |
| VII_j | VII.1.1 | <b>VII.1.1</b> | VII.1.1 | 2484 | MG717684.1 | teal           | Egypt  | SDU_3                       | 2016 |
| VII_j | VII.1.1 | <b>VII.1.1</b> | VII.1.1 | 2486 | MG717686.1 | teal           | Egypt  | SDU_4                       | 2016 |
| VII_b | VII.1.1 | <b>VII.1.1</b> | VII.1.1 | 2487 | MH445410.1 | chicken        | Egypt  | 18                          | 2015 |
| VII_l | VII.1.1 | <b>VII.1.1</b> | VII.1.1 | 2490 | MG519856.1 |                | Iran   | MSH_2                       | 2015 |
| VII_l | VII.1.1 | <b>VII.1.1</b> | VII.1.1 | 2491 | MG519857.1 |                | Iran   | MSH_3                       | 2015 |
| VII_l | VII.1.1 | <b>VII.1.1</b> | VII.1.1 | 2497 | MF417546.1 | chicken        | Iran   | Beh                         | 2011 |
| VII_j | VII.1.1 | <b>VII.1.1</b> | VII.1.1 | 2499 | MH105251.1 | chicken        | China  | Jiangsu_1816                | 2014 |
| VII_d | VII.1.1 | <b>VII.1.1</b> | VII.1.1 | 2500 | MH105250.1 | duck           | China  | Shandong_142                | 2015 |
| VII_l | VII.1.1 | <b>VII.1.1</b> | VII.1.1 | 2506 | MH247187.1 | chicken        | Iran   | MAM55                       | 2017 |
| VII_l | VII.1.1 | <b>VII.1.1</b> | VII.1.1 | 2507 | MH247186.1 | chicken        | Iran   | MAM52                       | 2017 |
| VII_l | VII.1.1 | <b>VII.1.1</b> | VII.1.1 | 2508 | MH247185.1 | chicken        | Iran   | MAM31                       | 2017 |



|       |         |         |         |      |            |         |              |                         |      |
|-------|---------|---------|---------|------|------------|---------|--------------|-------------------------|------|
| VII_l | VII.1.1 | VII.1.1 | VII.1.1 | 2509 | MH247184.1 | chicken | Iran         | MAM19                   | 2017 |
| VII_l | VII.1.1 | VII.1.1 | VII.1.1 | 2510 | MH481363.1 | chicken | Iran         | MAM81                   | 2018 |
| VII_l | VII.1.1 | VII.1.1 | VII.1.1 | 2511 | MH481362.1 | chicken | Iran         | MAM72                   | 2018 |
| VII_l | VII.1.1 | VII.1.1 | VII.1.1 | 2512 | MH481361.1 | chicken | Iran         | MAM68                   | 2017 |
| VII_f | VII.1.2 | VII.1.2 | VII.1.2 | 1311 | AF458010   | chicken | China        | JS_3                    | 2000 |
| VII_f | VII.1.2 | VII.1.2 | VII.1.2 | 1313 | AY028995   | fowl    | China        | A7                      | 1996 |
| VII_f | VII.1.2 | VII.1.2 | VII.1.2 | 1314 | GQ338309   | pigeon  | China        | 18                      | 2003 |
| VII_f | VII.1.2 | VII.1.2 | VII.1.2 | 1315 | GQ338310   | pigeon  | China        | 44                      | 2003 |
| VII_f | VII.1.2 | VII.1.2 | VII.1.2 | 1316 | DQ227246   | goose   | China        | Jiangsu_JS02            | 1999 |
| VII_f | VII.1.2 | VII.1.2 | VII.1.2 | 1317 | DQ227254   | chicken | China        | Broiler_Shandong_SWS_03 | 2003 |
| VII_f | VII.1.2 | VII.1.2 | VII.1.2 | 1318 | DQ858357   | goose   | China        | Jiangsu_YG              | 2003 |
| VII_a | VII.2   | VII.2   | VII.2   | 916  | JN986837   | chicken | Netherlands  | 152608_ancestral        | 1993 |
| VII_h | VII.2   | VII.2   | VII.2   | 1329 | HQ697255   | chicken | Indonesia    | Sukorejo_019            | 2010 |
| VII_h | VII.2   | VII.2   | VII.2   | 1330 | HQ697256   | chicken | Indonesia    | Makassar_003            | 2009 |
| VII_h | VII.2   | VII.2   | VII.2   | 1331 | HQ697261   | chicken | Bali         | bali_020_10             | 2010 |
| VII_h | VII.2   | VII.2   | VII.2   | 1332 | JX193074   | egret   | China        | egret_Guangxi           | 2011 |
| VII_h | VII.2   | VII.2   | VII.2   | 1333 | KF026013   | chicken | Malaysia     | UPM_IBS_002             | 2011 |
| VII_h | VII.2   | VII.2   | VII.2   | 1334 | KR074404   | chicken | Malaysia     | IBS002_11               | 2011 |
| VII_h | VII.2   | VII.2   | VII.2   | 1335 | KR074405   | chicken | Malaysia     | IBS005_11               | 2011 |
| VII_h | VII.2   | VII.2   | VII.2   | 1336 | KR815908   | turkey  | South_Africa | N2057                   | 2013 |
| VII_h | VII.2   | VII.2   | VII.2   | 1337 | KT760568   | chicken | China        | Guizhou_1032            | 2012 |
| VII_h | VII.2   | VII.2   | VII.2   | 1338 | KT760569   | goose   | China        | Yunnan_1200             | 2013 |
| VII_h | VII.2   | VII.2   | VII.2   | 1339 | KU175230   | chicken | China        | Guizhou_1031            | 2012 |
| VII_h | VII.2   | VII.2   | VII.2   | 1340 | KU175232   | chicken | China        | Guizhou_1176            | 2012 |
| VII_h | VII.2   | VII.2   | VII.2   | 1341 | KU523524   | chicken | Mozambique   | 466                     | 2012 |
| VII_h | VII.2   | VII.2   | VII.2   | 1342 | KU523526   | chicken | Mozambique   | 491                     | 2012 |
| VII_h | VII.2   | VII.2   | VII.2   | 1343 | KU523528   | chicken | Mozambique   | 658                     | 2012 |
| VII_h | VII.2   | VII.2   | VII.2   | 1344 | KU523529   | chicken | Mozambique   | 584                     | 2013 |
| VII_h | VII.2   | VII.2   | VII.2   | 1345 | KU523531   | chicken | Mozambique   | 494                     | 2014 |
| VII_h | VII.2   | VII.2   | VII.2   | 1346 | KU523533   | chicken | Mozambique   | 622                     | 2014 |
| VII_h | VII.2   | VII.2   | VII.2   | 1347 | KX231366   | chicken | Mozambique   | 1205                    | 2011 |
| VII_h | VII.2   | VII.2   | VII.2   | 1348 | KX231368   | chicken | Mozambique   | 192A                    | 2016 |
| VII_h | VII.2   | VII.2   | VII.2   | 2007 | MF622034.1 | chicken | South_Africa | 32995                   | 2015 |
| VII_h | VII.2   | VII.2   | VII.2   | 2008 | MF622035.1 | chicken | South_Africa | 230665                  | 2013 |

|       |       |       |       |      |            |         |              |                               |      |
|-------|-------|-------|-------|------|------------|---------|--------------|-------------------------------|------|
| VII_h | VII.2 | VII.2 | VII.2 | 2009 | MF622036.1 | chicken | Zimbabwe     | 235280                        | 2013 |
| VII_h | VII.2 | VII.2 | VII.2 | 2010 | MF622037.1 | chicken | South_Africa | 239391                        | 2013 |
| VII_h | VII.2 | VII.2 | VII.2 | 2011 | MF622038.1 | chicken | Zambia       | Chadiza                       | 2015 |
| VII_h | VII.2 | VII.2 | VII.2 | 2012 | MF622039.1 | chicken | South_Africa | H14973                        | 2014 |
| VII_h | VII.2 | VII.2 | VII.2 | 2013 | MF622040.1 | chicken | South_Africa | Inchanga                      | 2013 |
| VII_h | VII.2 | VII.2 | VII.2 | 2014 | MF622041.1 | chicken | Zambia       | Katete                        | 2015 |
| VII_h | VII.2 | VII.2 | VII.2 | 2015 | MF622042.1 | chicken | Zambia       | Mbeweka                       | 2015 |
| VII_h | VII.2 | VII.2 | VII.2 | 2016 | MF622043.1 | chicken | South_Africa | N2117                         | 2015 |
| VII_h | VII.2 | VII.2 | VII.2 | 2017 | MF622044.1 | chicken | South_Africa | N2683                         | 2015 |
| VII_h | VII.2 | VII.2 | VII.2 | 2018 | MF622045.1 | chicken | South_Africa | RBNW_1                        | 2013 |
| VII_h | VII.2 | VII.2 | VII.2 | 2020 | MF622047.1 | chicken | South_Africa | RBWW_3                        | 2013 |
| VII_i | VII.2 | VII.2 | VII.2 | 1403 | HQ697254   | chicken | Indonesia    | Banjarmasin_010               | 2010 |
| VII_i | VII.2 | VII.2 | VII.2 | 1404 | HQ697257   | chicken | Indonesia    | Gianyar_013                   | 2010 |
| VII_i | VII.2 | VII.2 | VII.2 | 1407 | KF113339   | chicken | Pakistan     | Lahore_30                     | 2011 |
| VII_i | VII.2 | VII.2 | VII.2 | 1408 | KF113341   | chicken | Pakistan     | Lahore_43                     | 2011 |
| VII_i | VII.2 | VII.2 | VII.2 | 1409 | KF113342   | chicken | Pakistan     | Lahore_50                     | 2011 |
| VII_i | VII.2 | VII.2 | VII.2 | 1410 | KF113343   | chicken | Pakistan     | Gujranwala_56                 | 2011 |
| VII_i | VII.2 | VII.2 | VII.2 | 1411 | KF113345   | chicken | Pakistan     | Khyber_Pukhtun_Khawa_117      | 2011 |
| VII_i | VII.2 | VII.2 | VII.2 | 1412 | KF113349   | chicken | Pakistan     | Kasure_191                    | 2012 |
| VII_i | VII.2 | VII.2 | VII.2 | 1413 | KF113350   | chicken | Pakistan     | Lahore_200                    | 2012 |
| VII_i | VII.2 | VII.2 | VII.2 | 1414 | KF113351   | chicken | Pakistan     | University_Vet_Animal_Sci_211 | 2012 |
| VII_i | VII.2 | VII.2 | VII.2 | 1415 | KF792019   | chicken | Israel       | KY50_826                      | 2013 |
| VII_i | VII.2 | VII.2 | VII.2 | 1416 | KF792021   | chicken | Israel       | BT_120_827                    | 2013 |
| VII_i | VII.2 | VII.2 | VII.2 | 1417 | KM670337   | chicken | Pakistan     | SFR_611_13                    | 2013 |
| VII_i | VII.2 | VII.2 | VII.2 | 1418 | KP719224   | chicken | Libya        | 13VIR_7225_1                  | 2013 |
| VII_i | VII.2 | VII.2 | VII.2 | 1419 | KP776462   | chicken | Pakistan     | AW_14                         | 2014 |
| VII_i | VII.2 | VII.2 | VII.2 | 1420 | KP780878   | chicken | Pakistan     | Gujranwala_649                | 2013 |
| VII_i | VII.2 | VII.2 | VII.2 | 1423 | KR676389   | chicken | Pakistan     | Kohat_122                     | 2011 |
| VII_i | VII.2 | VII.2 | VII.2 | 1424 | KR676391   | chicken | Pakistan     | Narowal_329                   | 2013 |
| VII_i | VII.2 | VII.2 | VII.2 | 1425 | KR676392   | chicken | Pakistan     | Waziabbad_431                 | 2013 |
| VII_i | VII.2 | VII.2 | VII.2 | 1426 | KR676396   | chicken | Pakistan     | Lahore_736                    | 2014 |
| VII_i | VII.2 | VII.2 | VII.2 | 1427 | KR676397   | chicken | Pakistan     | Attock_7_411                  | 2014 |
| VII_i | VII.2 | VII.2 | VII.2 | 1428 | KR676398   | chicken | Pakistan     | Multan_5_125                  | 2014 |
| VII_i | VII.2 | VII.2 | VII.2 | 1429 | KR676402   | chicken | Pakistan     | Lahore_12                     | 2015 |

|       |       |       |       |      |            |                   |          |                     |      |
|-------|-------|-------|-------|------|------------|-------------------|----------|---------------------|------|
| VII_i | VII.2 | VII.2 | VII.2 | 1430 | KR676403   | chicken           | Pakistan | Lahore_24           | 2015 |
| VII_i | VII.2 | VII.2 | VII.2 | 1431 | KR676404   | chicken           | Pakistan | Gujranwala_2        | 2015 |
| VII_i | VII.2 | VII.2 | VII.2 | 1434 | KU862287   | Peacock           | Pakistan | Lahore_AW_7         | 2013 |
| VII_i | VII.2 | VII.2 | VII.2 | 1435 | KU862288   | Peacock           | Pakistan | Lahore_AW_3         | 2014 |
| VII_i | VII.2 | VII.2 | VII.2 | 1436 | KU862291   | Peacock           | Pakistan | Pathoki_AW_1        | 2015 |
| VII_i | VII.2 | VII.2 | VII.2 | 1437 | KU862292   | Peacock           | Pakistan | Kamoki_AW_2         | 2015 |
| VII_i | VII.2 | VII.2 | VII.2 | 1438 | KU862293   | Parakeet          | Pakistan | Karachi_AW_1        | 2014 |
| VII_i | VII.2 | VII.2 | VII.2 | 1439 | KU862294   | Parakeet          | Pakistan | Lahore_AW_2         | 2014 |
| VII_i | VII.2 | VII.2 | VII.2 | 1440 | KU862295   | Parakeet          | Pakistan | Karachi_AW_3        | 2015 |
| VII_i | VII.2 | VII.2 | VII.2 | 1441 | KU862296   | Black_Swan        | Pakistan | Lahore_AW_1         | 2015 |
| VII_i | VII.2 | VII.2 | VII.2 | 1442 | KX268689   | parrot            | Pakistan | Lahore_SFR_129      | 2015 |
| VII_i | VII.2 | VII.2 | VII.2 | 1443 | KX496962   | wild_pigeon       | Pakistan | Lahore_20A_996      | 2015 |
| VII_i | VII.2 | VII.2 | VII.2 | 1444 | KX496963   | pigeon            | Pakistan | Lahore_22A_1001     | 2015 |
| VII_i | VII.2 | VII.2 | VII.2 | 1445 | KX496964   | pigeon            | Pakistan | Lahore_23A_997      | 2015 |
| VII_i | VII.2 | VII.2 | VII.2 | 1446 | KX496967   | pigeon            | Pakistan | Lahore_1085         | 2015 |
| VII_i | VII.2 | VII.2 | VII.2 | 1447 | KX791183   | parakeet          | Pakistan | R_Pindi_SFR_16      | 2016 |
| VII_i | VII.2 | VII.2 | VII.2 | 1448 | KX791184   | backyard          | Pakistan | Lahore_SFR_144A     | 2016 |
| VII_i | VII.2 | VII.2 | VII.2 | 1449 | KX791185   | backyard          | Pakistan | Lahore_SFR_144B     | 2016 |
| VII_i | VII.2 | VII.2 | VII.2 | 1450 | KX791186   | backyard          | Pakistan | Lahore_SFR_144C     | 2016 |
| VII_i | VII.2 | VII.2 | VII.2 | 1451 | KX791187   | backyard          | Pakistan | Lahore_SFR_144D     | 2016 |
| VII_i | VII.2 | VII.2 | VII.2 | 1452 | KY076031   | chicken           | Pakistan | Wazirabad_15A_995   | 2015 |
| VII_i | VII.2 | VII.2 | VII.2 | 1453 | KY076032   | chicken           | Pakistan | Kasur_26A_998       | 2011 |
| VII_i | VII.2 | VII.2 | VII.2 | 1454 | KY076035   | chicken           | Pakistan | Pattoki_1A_1002     | 2015 |
| VII_i | VII.2 | VII.2 | VII.2 | 1455 | KY076039   | chicken           | Pakistan | Gujranwala_13A_1009 | 2015 |
| VII_k | VII.2 | VII.2 | VII.2 | 1604 | KY747479.1 | chicken           | Namibia  | 5620                | 2016 |
| VII_k | VII.2 | VII.2 | VII.2 | 1605 | KY747480.1 | chicken           | Namibia  | 6195                | 2016 |
| VII_k | VII.2 | VII.2 | VII.2 | 1606 | KY747481.1 | chicken           | Namibia  | 6196                | 2016 |
| VII_k | VII.2 | VII.2 | VII.2 | 1607 | KY747482.1 | chicken           | Namibia  | 6403                | 2016 |
| VII_k | VII.2 | VII.2 | VII.2 | 1608 | KY747483.1 | chicken           | Namibia  | 6762                | 2016 |
| VII_i | VII.2 | VII.2 | VII.2 | 2053 | KY967611.1 | mallard           | Pakistan | I_UVAS              | 2016 |
| VII_i | VII.2 | VII.2 | VII.2 | 2084 | MF437287.1 | Anas_carolinenses | Pakistan | II_UVAS             | 2015 |
| VII_i | VII.2 | VII.2 | VII.2 | 2098 | MG200021   | chicken           | Pakistan | Lahore_965          | 2015 |
| VII_i | VII.2 | VII.2 | VII.2 | 2099 | MG200022   | chicken           | Pakistan | Kassur_966          | 2015 |
| VII_i | VII.2 | VII.2 | VII.2 | 2101 | MG200024   | chicken           | Pakistan | Sheikhupura_969     | 2015 |

|       |       |       |       |      |            |            |          |                |      |
|-------|-------|-------|-------|------|------------|------------|----------|----------------|------|
| VII_i | VII.2 | VII.2 | VII.2 | 2102 | MG200025   | chicken    | Pakistan | Lahore_972     | 2015 |
| VII_i | VII.2 | VII.2 | VII.2 | 2103 | MG200026   | chicken    | Pakistan | Gujranwala_978 | 2015 |
| VII_i | VII.2 | VII.2 | VII.2 | 2113 | MG686589.1 | goose      | Pakistan | SKHP_AW_101    | 2015 |
| VII_i | VII.2 | VII.2 | VII.2 | 2114 | MG686590.1 | duck       | Pakistan | GUJR_AW_51     | 2015 |
| VII_i | VII.2 | VII.2 | VII.2 | 2115 | MG686591.1 | duck       | Pakistan | GUJR_AW_52     | 2015 |
| VII_i | VII.2 | VII.2 | VII.2 | 2116 | MG686592.1 | duck       | Pakistan | ISLM_AW_1      | 2015 |
| VII_i | VII.2 | VII.2 | VII.2 | 2117 | MG686593.1 | goose      | Pakistan | SLK_AW_16      | 2015 |
| VII_i | VII.2 | VII.2 | VII.2 | 2118 | MG686594.1 | goose      | Pakistan | SKHP_AW_102    | 2015 |
| VII_i | VII.2 | VII.2 | VII.2 | 2119 | MG686595.1 | goose      | Pakistan | SKHP_AW_103    | 2015 |
| VII_i | VII.2 | VII.2 | VII.2 | 2120 | MG686596.1 | goose      | Pakistan | SKHP_AW_104    | 2015 |
| VII_i | VII.2 | VII.2 | VII.2 | 2121 | MG686597.1 | duck       | Pakistan | GUJR_AW_53     | 2015 |
| VII_i | VII.2 | VII.2 | VII.2 | 2122 | MG686598.1 | goose      | Pakistan | GUJR_AW_55     | 2015 |
| VII_i | VII.2 | VII.2 | VII.2 | 2123 | MG686599.1 | goose      | Pakistan | GUJR_AW_54     | 2015 |
| VII_i | VII.2 | VII.2 | VII.2 | 2124 | MG686600.1 | duck       | Pakistan | GUJR_AW_56     | 2015 |
| VII_i | VII.2 | VII.2 | VII.2 | 2125 | MG686601.1 | duck       | Pakistan | Lahore_AW_4    | 2017 |
| VII_i | VII.2 | VII.2 | VII.2 | 2127 | MG686603.1 | duck       | Pakistan | KAR_AW_2       | 2014 |
| VII_i | VII.2 | VII.2 | VII.2 | 2128 | MG686604.1 | duck       | Pakistan | Lahore_AW_6    | 2016 |
| VII_i | VII.2 | VII.2 | VII.2 | 2129 | MG686605.1 | duck       | Pakistan | SLK_AW_15      | 2016 |
| VII_i | VII.2 | VII.2 | VII.2 | 2130 | MG686606.1 | duck       | Pakistan | SLK_AW_14      | 2016 |
| VII_i | VII.2 | VII.2 | VII.2 | 2132 | MG686608.1 | black_swan | Pakistan | Lahore_AW_8    | 2016 |
| VII_i | VII.2 | VII.2 | VII.2 | 2133 | MG686609.1 | goose      | Pakistan | Lahore_AW_3    | 2017 |
| VII_h | VII.2 | VII.2 | VII.2 | 2140 | MG869268.1 | chicken    | Vietnam  | 15A1           | 2015 |
| VII_h | VII.2 | VII.2 | VII.2 | 2141 | MG869269.1 | chicken    | Vietnam  | LC15           | 2015 |
| VII_i | VII.2 | VII.2 | VII.2 | 2145 | MG871466.1 | chicken    | Iran     | PCR_UT         | 2017 |
| VII_i | VII.2 | VII.2 | VII.2 | 2152 | MH120424.1 | chicken    | Pakistan | NIAB           | 2017 |
| VII_i | VII.2 | VII.2 | VII.2 | 2167 | MH371036.1 | turkey     | Israel   | PHL138692      | 2011 |
| VII_i | VII.2 | VII.2 | VII.2 | 2168 | MH371037.1 | chicken    | Israel   | PHL137592      | 2011 |
| VII_i | VII.2 | VII.2 | VII.2 | 2181 | MH371050.1 | chicken    | Israel   | PHL168757      | 2013 |
| VII_i | VII.2 | VII.2 | VII.2 | 2197 | MH371066.1 | chicken    | Israel   | PHL149165      | 2012 |
| VII_i | VII.2 | VII.2 | VII.2 | 2201 | MH371070.1 | chicken    | Israel   | PHL159057      | 2012 |
| VII_i | VII.2 | VII.2 | VII.2 | 2203 | MH371072.1 | chicken    | Israel   | PHL175571      | 2013 |
| VII_i | VII.2 | VII.2 | VII.2 | 2228 | MH371097.1 | chicken    | Israel   | PHL140339      | 2011 |
| VII_i | VII.2 | VII.2 | VII.2 | 2251 | MH377263.1 | turkey     | Israel   | PHL143483      | 2012 |
| VII_i | VII.2 | VII.2 | VII.2 | 2254 | MH377266.1 | chicken    | Israel   | PHL167788      | 2012 |

|       |       |       |       |      |            |                  |          |                   |      |
|-------|-------|-------|-------|------|------------|------------------|----------|-------------------|------|
| VII_i | VII.2 | VII.2 | VII.2 | 2255 | MH377267.1 | chicken          | Israel   | PHL169208         | 2013 |
| VII_i | VII.2 | VII.2 | VII.2 | 2277 | MH377289.1 | chicken          | Israel   | PHL174621         | 2013 |
| VII_i | VII.2 | VII.2 | VII.2 | 2278 | MH377290.1 | turkey           | Israel   | PHL176533         | 2013 |
| VII_i | VII.2 | VII.2 | VII.2 | 2291 | MH377303.1 | common_kestrel   | Israel   | PHL264753         | 2012 |
| VII_i | VII.2 | VII.2 | VII.2 | 2304 | MH377316.1 | chicken          | Israel   | PHL141759         | 2011 |
| VII_i | VII.2 | VII.2 | VII.2 | 2306 | MH377318.1 | chicken          | Israel   | PHL142626         | 2012 |
| VII_i | VII.2 | VII.2 | VII.2 | 2307 | MH377319.1 | turkey           | Israel   | PHL142784         | 2012 |
| VII_i | VII.2 | VII.2 | VII.2 | 2308 | MH377320.1 | chicken          | Israel   | PHL143114         | 2012 |
| VII_i | VII.2 | VII.2 | VII.2 | 2309 | MH377321.1 | chicken          | Israel   | PHL143696         | 2012 |
| VII_i | VII.2 | VII.2 | VII.2 | 2311 | MH377323.1 | chicken          | Israel   | PHL147004         | 2012 |
| VII_i | VII.2 | VII.2 | VII.2 | 2331 | MH432252.1 | bassette_chicken | Belgium  | 4096              | 2018 |
| VII_i | VII.2 | VII.2 | VII.2 | 2332 | MH614933.1 | chicken          | Jordan   | J11_Spleen        | 2018 |
| VII_i | VII.2 | VII.2 | VII.2 | 2334 | MH717055.1 | chicken          | Pakistan | AJK_AW_c21        | 2017 |
| VII_i | VII.2 | VII.2 | VII.2 | 2335 | MH717056.1 | chicken          | Pakistan | AJK_AW_c22        | 2017 |
| VII_i | VII.2 | VII.2 | VII.2 | 2336 | MH717057.1 | chicken          | Pakistan | AJK_AW_c23        | 2017 |
| VII_i | VII.2 | VII.2 | VII.2 | 2337 | MH717058.1 | chicken          | Pakistan | AJK_AW_c24        | 2017 |
| VII_i | VII.2 | VII.2 | VII.2 | 2338 | MH717059.1 | chicken          | Pakistan | AJK_AW_c25        | 2018 |
| VII_i | VII.2 | VII.2 | VII.2 | 2339 | MH717060.1 | chicken          | Pakistan | AJK_AW_c26        | 2018 |
| VII_i | VII.2 | VII.2 | VII.2 | 2340 | MH717061.1 | chicken          | Pakistan | AJK_AW_by31       | 2017 |
| VII_i | VII.2 | VII.2 | VII.2 | 2341 | MH717062.1 | chicken          | Pakistan | AJK_AW_by32       | 2017 |
| VII_i | VII.2 | VII.2 | VII.2 | 2342 | MH717063.1 | chicken          | Pakistan | AJK_AW_by33       | 2017 |
| VII_i | VII.2 | VII.2 | VII.2 | 2343 | MH717064.1 | chicken          | Pakistan | AJK_AW_by34       | 2018 |
| VII_i | VII.2 | VII.2 | VII.2 | 2344 | MH717065.1 | chicken          | Pakistan | AJK_AW_by35       | 2018 |
| VII_i | VII.2 | VII.2 | VII.2 | 2345 | MH717066.1 | duck             | Pakistan | AJK_AW_d41        | 2018 |
| VII_i | VII.2 | VII.2 | VII.2 | 2346 | MH717067.1 | duck             | Pakistan | AJK_AW_d42        | 2018 |
| VII_i | VII.2 | VII.2 | VII.2 | 2347 | MH717068.1 | duck             | Pakistan | AJK_AW_d43        | 2018 |
| VII_i | VII.2 | VII.2 | VII.2 | 2348 | MH717069.1 | peacock          | Pakistan | AJK_AW_pc45       | 2018 |
| VII_i | VII.2 | VII.2 | VII.2 | 2463 | MK006009   | chicken          | Pakistan | Sargohda_9CCS     | 2015 |
| VII_i | VII.2 | VII.2 | VII.2 | 2464 | MK006010   | chicken          | Pakistan | Sargohda_10CCS    | 2015 |
| VII_i | VII.2 | VII.2 | VII.2 | 2465 | MK006011   | chicken          | Pakistan | MirpurKhas_3EOS   | 2015 |
| VII_i | VII.2 | VII.2 | VII.2 | 2468 | MK006014   | chicken          | Pakistan | BankaCheema_PF_1H | 2015 |
| VII_i | VII.2 | VII.2 | VII.2 | 2470 | MK006016   | chicken          | Pakistan | BankaCheema_2HOS  | 2015 |
| VII_i | VII.2 | VII.2 | VII.2 | 2471 | MK006017   | chicken          | Pakistan | WadanaKasur_1FOS  | 2015 |
| VII_h | VII.2 | VII.2 | VII.2 | 2501 | MH105249.1 | duck             | China    | Yunnan            | 2017 |

|       |       |       |       |      |            |                     |            |                    |       |
|-------|-------|-------|-------|------|------------|---------------------|------------|--------------------|-------|
| VII_h | VII.2 | VII.2 | VII.2 | 2502 | MH105247.1 | chicken             | China      | Yunnan_1113        | 2017  |
| VII_i | VII.2 | VII.2 | VII.2 | 2503 | MK069429.1 | chicken             | China      | Kulonprogo_4171317 | 2017  |
| VII_j | VII.2 | VII.2 | VII.2 | 2504 | MK069428.1 | chicken             | China      | Belitung_3150041   | 2015  |
| VII_i | VII.2 | VII.2 | VII.2 | 1422 | KR074407   | chicken             | Malaysia   | MB128_04           | 2004  |
| VIII  | VIII  | VIII  | VIII  | 1623 | AF048763   | chicken             | Malaysia   | AF2240             | 1960  |
| VIII  | VIII  | VIII  | VIII  | 1624 | AY734534   | chicken             | Argentina  | Trenque_Lauquen    | 1970  |
| VIII  | VIII  | VIII  | VIII  | 1625 | FJ751918   | chicken             | China      | QH1                | 1979  |
| VIII  | VIII  | VIII  | VIII  | 1626 | FJ751919   | chicken             | China      | QH4                | 1985  |
| VIII  | VIII  | VIII  | VIII  | 1627 | JX012096   | _                   | Malaysia   | AF2240_I           | 1960s |
| VIII  | VIII  | VIII  | VIII  | 2505 | MH715892.1 | game_fowl           | China      | GXGB               | 2011  |
| X     | X     | X     | X     | 1672 | AY727881   | duck                | Argentina  | 32C_T_98           | 1998  |
| X     | X     | X     | X     | 1673 | AY727882   | swan                | Argentina  | 126C_00            | 2000  |
| X_a   | X     | X     | X     | 1677 | EF564826   | northern_pintail    | USA        | US_OH_87_486       | 1987  |
| X_a   | X     | X     | X     | 1678 | FJ705468   | mottled_duck        | USA        | US_TX_TX01_130     | 2001  |
| X_a   | X     | X     | X     | 1679 | JN872171   | turkey              | USA        | Minnesota_17531_3_ | 2010  |
| X_a   | X     | X     | X     | 1680 | KX857713   | Mallard             | MN_USA     | AI09_1832          | 2009  |
| X_a   | X     | X     | X     | 1681 | KX857714   | Blue_winged_teal    | ND_USA     | AI09_2902          | 2009  |
| X_a   | X     | X     | X     | 1682 | KX857715   | Blue_winged_teal    | ND_USA     | AI09_3678          | 2009  |
| X_a   | X     | X     | X     | 1683 | KX857716   | Redhead             | ND_USA     | AI09_4117          | 2009  |
| X_a   | X     | X     | X     | 1684 | KX857717   | Mallard             | MN_USA     | AI13_4156          | 2013  |
| X_b   | X     | X     | X     | 1685 | EF564832   | mallard             | USA        | US_OH_86_233       | 1986  |
| X_b   | X     | X     | X     | 1686 | FJ705464   | mallard             | USA        | US_OH_04_411       | 2004  |
| X_b   | X     | X     | X     | 1687 | FJ705465   | mallard             | USA        | US_MN_03_632       | 2003  |
| X_b   | X     | X     | X     | 1688 | FJ705466   | mallard             | USA        | US_MN_99_376       | 1999  |
| X_b   | X     | X     | X     | 1689 | FJ705467   | mallard             | USA        | US_MN_MN00_32      | 2000  |
| X_b   | X     | X     | X     | 1690 | FJ705469   | mallard             | USA        | US_MN_MN00_39      | 2000  |
| X_b   | X     | X     | X     | 1691 | KX857718   | American_black_duck | MN_USA     | AI09_3836          | 2009  |
| X_b   | X     | X     | X     | 1692 | KX857719   | Mallard             | MN_USA     | AI10_2806          | 2010  |
| X_b   | X     | X     | X     | 1693 | KX857720   | Mallard             | MN_USA     | AI10_2962          | 2010  |
| X_b   | X     | X     | X     | 1694 | KX857721   | Mallard             | MN_USA     | AI10_3434          | 2010  |
| X_b   | X     | X     | X     | 1696 | KX857723   | Blue_winged_teal    | MN_USA     | AI08_4957          | 2008  |
| X_b   | X     | X     | X     | 2323 | MH392221   | mallard             | USA_MN_    | 99_376_163         | 1999  |
| XI    | XI    | XI    | XI    | 1697 | HQ266602   | chicken             | Madagascar | MG_725             | 2008  |
| XI    | XI    | XI    | XI    | 1698 | HQ266603   | chicken             | Madagascar | MG_1992            | 2008  |

|       |       |       |       |      |            |          |            |                  |      |
|-------|-------|-------|-------|------|------------|----------|------------|------------------|------|
| XI    | XI    | XI    | XI    | 1699 | HQ266604   | chicken  | Madagascar | MG_Meola         | 2008 |
| XI    | XI    | XI    | XI    | 1700 | HQ266605   | chicken  | Madagascar | MG_39_4          | 2008 |
| XI    | XI    | XI    | XI    | 1701 | JX518875   | chicken  | Madagascar | MGBBS_           | 2009 |
| XI    | XI    | XI    | XI    | 1702 | JX518876   | chicken  | Madagascar | MGF003C_         | 2010 |
| XI    | XI    | XI    | XI    | 1703 | JX518877   | chicken  | Madagascar | MGF015C_         | 2011 |
| XI    | XI    | XI    | XI    | 1704 | JX518878   | chicken  | Madagascar | MGF082T_         | 2010 |
| XI    | XI    | XI    | XI    | 1705 | JX518879   | chicken  | Madagascar | MGF120T_         | 2010 |
| XI    | XI    | XI    | XI    | 1706 | JX518880   | duck     | Madagascar | MGF166_          | 2010 |
| XI    | XI    | XI    | XI    | 1707 | JX518881   | chicken  | Madagascar | MGF192C_         | 2010 |
| XI    | XI    | XI    | XI    | 1708 | JX518882   | chicken  | Madagascar | MGMNJ_           | 2009 |
| XI    | XI    | XI    | XI    | 1709 | JX518883   | chicken  | Madagascar | MGS1130T_        | 2011 |
| XI    | XI    | XI    | XI    | 1710 | JX518884   | chicken  | Madagascar | MGS1595T_        | 2011 |
| XII_d | XII   | XII   | XII   | 2142 | MG869270.1 | chicken  | Vietnam    | NDVQG            | 2008 |
| XII_d | XII   | XII   | XII   | 2143 | MG869271.1 | chicken  | Vietnam    | NCXKH            | 2011 |
| XII_d | XII   | XII   | XII   | 2144 | MG869272.1 | chicken  | Vietnam    | NCXMT            | 2014 |
| XII_a | XII.1 | XII.1 | XII.1 | 1712 | JN800306   | chicken  | Peru       | 1918_03          | 2008 |
| XII_a | XII.1 | XII.1 | XII.1 | 1713 | KJ865695   | chicken  | Colombia   | 1326_13285       | 2009 |
| XII_a | XII.1 | XII.1 | XII.1 | 1714 | KJ865696   | chicken  | Colombia   | 1326_13286       | 2009 |
| XII_a | XII.1 | XII.1 | XII.1 | 1715 | KR732614   | peacock  | Peru       |                  | 2011 |
| XII_a | XII.1 | XII.1 | XII.1 | 1716 | KU594613   | gamecock | Peru       | Lima_40931       | 2004 |
| XII_a | XII.1 | XII.1 | XII.1 | 1717 | KU594614   | gamecock | Peru       | Lima_40785       | 2004 |
| XII_a | XII.1 | XII.1 | XII.1 | 1718 | KU594615   | chicken  | Peru       | Apurimac_50009   | 2005 |
| XII_a | XII.1 | XII.1 | XII.1 | 1719 | KU594616   | gamecock | Peru       | Lurin_40871      | 2004 |
| XII_a | XII.1 | XII.1 | XII.1 | 1720 | KU594617   | chicken  | Peru       | Piura_60087      | 2006 |
| XII_a | XII.1 | XII.1 | XII.1 | 1721 | KU594618   | chicken  | Peru       | Arequipa_VFAR_81 | 2015 |
| XII_b | XII.2 | XII.2 | XII.2 | 1724 | JN627504   | goose    | China      | GD_12            | 2011 |
| XII_b | XII.2 | XII.2 | XII.2 | 1725 | JN627507   | goose    | China      | GD_1003          | 2010 |
| XII_b | XII.2 | XII.2 | XII.2 | 1726 | JN627508   | goose    | China      | GD_450           | 2011 |
| XII_b | XII.2 | XII.2 | XII.2 | 1727 | KC551967   | goose    | China      | Guangdong        | 2010 |
| XII_b | XII.2 | XII.2 | XII.2 | 1997 | MF278926.1 | goose    | China      | FS_GM_4          | 2011 |
| XII_b | XII.2 | XII.2 | XII.2 | 1998 | MF278927.1 | goose    | China      | FS_SS_292        | 2013 |
| XII_b | XII.2 | XII.2 | XII.2 | 1999 | MF278928.1 | goose    | China      | ZQ_JL_12         | 2011 |
| XII_b | XII.2 | XII.2 | XII.2 | 2000 | MF278929.1 | goose    | China      | ZQ_XG_17         | 2011 |
| XII_b | XII.2 | XII.2 | XII.2 | 2001 | MF278930.1 | goose    | China      | ZQ_XG_502        | 2014 |

|        |              |          |          |      |            |                  |              |                 |      |
|--------|--------------|----------|----------|------|------------|------------------|--------------|-----------------|------|
| XII_b  | XII.2        | XII.2    | XII.2    | 2003 | MF278933.1 | muscovy_duck     | China        | MM_GZ_884       | 2016 |
| XIII   | XIII.1       | XIII.1   | XIII.1   | 1728 | JN942041   | cockatoo         | India        | 7847_ancestral  | 1982 |
| XIII_a | XIII.1.1     | XIII.1.2 | XIII.1.1 | 1730 | AY865652   | Sterna_albifrons | Russia       | Astr_2755       | 2001 |
| XIII_a | XIII.1.1     | XIII.1.2 | XIII.1.1 | 1733 | GU585905   | chicken          | Sweden       |                 | 1997 |
| XIII_a | XIII.1.1     | XIII.1.2 | XIII.1.1 | 1734 | HQ589257   | chicken          | India        | Bareilly        | 1997 |
| XIII_a | XIII.1.1     | XIII.1.2 | XIII.1.1 | 1738 | KF727980   | chicken          | India        | Bareilly        | 2006 |
| XIII_a | XIII.1.1     | XIII.1.2 | XIII.1.1 | 1739 | KJ577585   | chicken          | India        | Bareilly_01     | 2010 |
| XIII_a | XIII.1.1     | XIII.1.1 | XIII.1.1 | 1731 | FJ772491   | chicken          | Burundi      | 4132_12         | 2008 |
| XIII_a | XIII.1.1     | XIII.1.1 | XIII.1.1 | 1732 | FJ772494   | chicken          | Burundi      | 4132_20         | 2008 |
| XIII_a | XIII.1.1     | XIII.1.1 | XIII.1.1 | 1735 | JN942034   | ostrich          | South_Africa | 45445_3         | 1995 |
| XIII_a | XIII.1.1     | XIII.1.1 | XIII.1.1 | 1736 | JN942043   | roller           | Tanzania     | 47385_11        | 2010 |
| XIII_a | XIII.1.1     | XIII.1.1 | XIII.1.1 | 1737 | JN942044   | roller           | Tanzania     | 47387_6         | 2010 |
| XIII_a | XIII.1.1     | XIII.1.1 | XIII.1.1 | 1740 | MF409241.1 | chicken          | Zambia       | Chiwoko         | 2015 |
| XIII_a | XIII.1.2.1   | XIII.1.2 | XIII.1.2 | 1778 | JQ267579   | chicken          | Iran         | EMM_7           | 2011 |
| XIII_a | XIII.1.2.1   | XIII.1.2 | XIII.1.2 | 1779 | JQ267580   | chicken          | Iran         | EMM_6           | 2011 |
| XIII_a | XIII.1.2.1   | XIII.1.2 | XIII.1.2 | 1780 | JQ267581   | chicken          | Iran         | EMM_5           | 2011 |
| XIII_a | XIII.1.2.1   | XIII.1.2 | XIII.1.2 | 1781 | JQ267582   | chicken          | Iran         | EMM_4           | 2010 |
| XIII_a | XIII.1.2.1   | XIII.1.2 | XIII.1.2 | 1782 | JQ267583   | chicken          | Iran         | EMM_3           | 2009 |
| XIII_a | XIII.1.2.1   | XIII.1.2 | XIII.1.2 | 1783 | JQ267584   | chicken          | Iran         | EMM_2           | 2008 |
| XIII_a | XIII.1.2.1   | XIII.1.2 | XIII.1.2 | 1784 | JQ267585   | chicken          | Iran         | EMM_1           | 2008 |
| XIII_b | XIII.1       | XIII.2   | XIII.2   | 1729 | KT734766   | chicken          | India        | Pandu           | 2015 |
| XIII_b | XIII.1       | XIII.2   | XIII.2   | 2022 | KY828161.1 | chicken          | India        | MZ_7            | 2016 |
| XIII_b | XIII.1       | XIII.2   | XIII.2   | 2023 | KY828160.1 | chicken          | India        | MZ_6            | 2016 |
| XIII_b | XIII.1       | XIII.2   | XIII.2   | 2024 | KY828159.1 | chicken          | India        | MZ_5            | 2016 |
| XIII_b | XIII.1       | XIII.2   | XIII.2   | 2025 | KY828158.1 | chicken          | India        | MZ_4            | 2016 |
| XIII_b | XIII.1       | XIII.2   | XIII.2   | 2026 | KY828157.1 | chicken          | India        | MZ_3            | 2016 |
| XIII_b | XIII.1       | XIII.2   | XIII.2   | 2027 | KY828156.1 | chicken          | India        | MZ_2            | 2016 |
| XIII_b | XIII.1       | XIII.2   | XIII.2   | 2028 | KY828155.1 | chicken          | India        | MZ_1            | 2016 |
| XIII_b | XIII.1       | XIII.2   | XIII.2   | 2076 | MF422123.1 | chicken          | India        | 110_13A         | 2013 |
| XIII_b | XIII.1.2.2.2 | XIII.2.1 | XIII.2.1 | 1745 | GU182323   | chicken          | Pakistan     | SPVC_Karachi_43 | 2008 |
| XIII_b | XIII.1.2.2.1 | XIII.2.1 | XIII.2.1 | 1747 | GU182331   | chicken          | Pakistan     | SPVC_Karachi_33 | 2007 |
| XIII_b | XIII.1.2.2.1 | XIII.2.1 | XIII.2.1 | 1748 | JN682184   | chicken          | Pakistan     | BYP_Lahore      | 2010 |
| XIII_b | XIII.1.2.2.1 | XIII.2.1 | XIII.2.1 | 1749 | JN682186   | chicken          | Pakistan     | CP_Islamabad1   | 2010 |
| XIII_b | XIII.1.2.2.1 | XIII.2.1 | XIII.2.1 | 1750 | JN682187   | chicken          | Pakistan     | BYP_Rawalpindi  | 2010 |
| XIII_b | XIII.1.2.2.1 | XIII.2.1 | XIII.2.1 | 1752 | JN682189   | chicken          | Pakistan     | CP_Rawalpindi2  | 2010 |
| XIII_b | XIII.1.2.2.1 | XIII.2.1 | XIII.2.1 | 1753 | JN682190   | chicken          | Pakistan     | CP_Islamabad2   | 2010 |
| XIII_b | XIII.1.2.2.1 | XIII.2.1 | XIII.2.1 | 1754 | JN682191   | chicken          | Pakistan     | CP_Islamabad3   | 2010 |



|        |              |                 |          |      |            |                |          |                              |      |
|--------|--------------|-----------------|----------|------|------------|----------------|----------|------------------------------|------|
| XIII_b | XIII.1.2.2.1 | <b>XIII.2.1</b> | XIII.2.1 | 1755 | JN682211   | chicken        | Pakistan | CP                           | 2010 |
| XIII_b | XIII.1.2.2.1 | <b>XIII.2.1</b> | XIII.2.1 | 1756 | JQ517285   | chicken        | Pakistan | Pakistan_UDL8                | 2011 |
| XIII_b | XIII.1.2.2.1 | <b>XIII.2.1</b> | XIII.2.1 | 1757 | JX436344   | chicken        | Pakistan | MM14_Lahore                  | 2010 |
| XIII_b | XIII.1.2.2.1 | <b>XIII.2.1</b> | XIII.2.1 | 1758 | KF113338   | chicken        | Pakistan | University_Diagnostic_Lab_12 | 2010 |
| XIII_b | XIII.1.2.2.1 | <b>XIII.2.1</b> | XIII.2.1 | 2050 | MH019281.1 | chicken        | Pakistan | PK1                          | 2015 |
| XIII_b | XIII.1.2.2.1 | <b>XIII.2.1</b> | XIII.2.1 | 2324 | MH392222   | chicken        | Pakistan | SPVC_Karachi_27_558          | 2007 |
| XIII_b | XIII.1.2.2.1 | <b>XIII.2.1</b> | XIII.2.1 | 2325 | MH392223   | chicken        | Pakistan | SPVC_Karachi_33_556          | 2007 |
| XIII_b | XIII.1.2.2.2 | <b>XIII.2.2</b> | XIII.2.2 | 1760 | KF740478   | Japanese_quail | India    | NDV2K35_TN                   | 2003 |
| XIII_b | XIII.1.2.2.2 | <b>XIII.2.2</b> | XIII.2.2 | 1761 | KM056344   | chicken        | India    | ndv16_Godhra_03              | 2013 |
| XIII_b | XIII.1.2.2.2 | <b>XIII.2.2</b> | XIII.2.2 | 1762 | KM056345   | chicken        | India    | ndv20_Navli_03               | 2013 |
| XIII_b | XIII.1.2.2.2 | <b>XIII.2.2</b> | XIII.2.2 | 1763 | KM056346   | chicken        | India    | ndv26_navli_03               | 2013 |
| XIII_b | XIII.1.2.2.2 | <b>XIII.2.2</b> | XIII.2.2 | 1764 | KM056347   | chicken        | India    | ndv32_vaherakhadi_04         | 2013 |
| XIII_b | XIII.1.2.2.2 | <b>XIII.2.2</b> | XIII.2.2 | 1765 | KM056348   | chicken        | India    | ndv40_sarsa_04               | 2013 |
| XIII_b | XIII.1.2.2.2 | <b>XIII.2.2</b> | XIII.2.2 | 1766 | KM056349   | chicken        | India    | ndv42_gopalpura_04           | 2013 |
| XIII_b | XIII.1.2.2.2 | <b>XIII.2.2</b> | XIII.2.2 | 1767 | KM056350   | chicken        | India    | ndv52_Sarsa                  | --   |
| XIII_b | XIII.1.2.2.2 | <b>XIII.2.2</b> | XIII.2.2 | 1768 | KM056352   | chicken        | India    | ndv54_Hyderabad              | --   |
| XIII_b | XIII.1.2.2.2 | <b>XIII.2.2</b> | XIII.2.2 | 1769 | KP089979   | chicken        | India    | Nagpur                       | 2012 |
| XIII_b | XIII.1.2.2.2 | <b>XIII.2.2</b> | XIII.2.2 | 1770 | KT734767   | chicken        | India    | Polashbari                   | 2014 |
| XIII_b | XIII.1.2.2.2 | <b>XIII.2.2</b> | XIII.2.2 | 1771 | KX061544   | Red_lori       | India    | CHN                          | 2013 |
| XIII_b | XIII.1.2.2.2 | <b>XIII.2.2</b> | XIII.2.2 | 1772 | KX242342   | chicken        | India    | D162                         | 2013 |
| XIII_b | XIII.1.2.2.2 | <b>XIII.2.2</b> | XIII.2.2 | 1773 | KX372707   | chicken        | India    | Nagpur_03                    | 2011 |
| XIII_b | XIII.1.2.2.2 | <b>XIII.2.2</b> | XIII.2.2 | 1774 | KX372708   | chicken        | India    | Nagpur_04                    | 2011 |
| XIII_b | XIII.1.2.2.2 | <b>XIII.2.2</b> | XIII.2.2 | 1785 | KT734765   | chicken        | India    | Hajo                         | 2014 |
| XIII_b | XIII.1.2.2.2 | <b>XIII.2.2</b> | XIII.2.2 | 2070 | MF362983.1 | chicken        | India    | PDDSL_2                      | 2015 |
| XIII_b | XIII.1.2.2.2 | <b>XIII.2.2</b> | XIII.2.2 | 2071 | MF362984.1 | chicken        | India    | PDDSL_3                      | 2015 |
| XIII_b | XIII.1.2.2.2 | <b>XIII.2.2</b> | XIII.2.2 | 2072 | MF362985.1 | chicken        | India    | PDDSL_4                      | 2015 |
| XIII_b | XIII.1.2.2.2 | <b>XIII.2.2</b> | XIII.2.2 | 2073 | MF362986.1 | chicken        | India    | PDDSL_5                      | 2015 |
| XIII_b | XIII.1.2.2.2 | <b>XIII.2.2</b> | XIII.2.2 | 2075 | MF362988.1 | chicken        | India    | PDDSL_7                      | 2016 |
| XIII_b | XIII.1.2.2.2 | <b>XIII.2.2</b> | XIII.2.2 | 2077 | MF422124.1 | chicken        | India    | 229_13B                      | 2013 |
| XIII_b | XIII.1.2.2.2 | <b>XIII.2.2</b> | XIII.2.2 | 2078 | MF422125.1 | chicken        | India    | 96_15                        | 2015 |
| XIII_b | XIII.1.2.2.2 | <b>XIII.2.2</b> | XIII.2.2 | 2079 | MF422126.1 | chicken        | India    | 478_13A                      | 2013 |
| XIII_b | XIII.1.2.2.2 | <b>XIII.2.2</b> | XIII.2.2 | 2080 | MF422127.1 | chicken        | India    | 805_13B                      | 2013 |
| XIII_b | XIII.1.2.2.2 | <b>XIII.2.2</b> | XIII.2.2 | 2081 | MF422128.1 | chicken        | India    | 248_13A2                     | 2013 |
| XIII_b | XIII.1.2.2.2 | <b>XIII.2.2</b> | XIII.2.2 | 2082 | MF422129.1 | chicken        | India    | 410_16A                      | 2016 |
| XIV    | XIV          | <b>XIV</b>      | XIV      | 1786 | JF966386   | chicken        | Mali     | ML029                        | 2007 |
| XIV_a  | XIV.1        | <b>XIV.1</b>    | XIV.1    | 1790 | FJ772452   | chicken        | Nigeria  | 1377_8                       | 2006 |
| XIV_a  | XIV.1        | <b>XIV.1</b>    | XIV.1    | 1791 | HF969131   | chicken        | Nigeria  | NIE08_2117                   | 2009 |
| XIV_a  | XIV.1        | <b>XIV.1</b>    | XIV.1    | 1792 | HF969136   | chicken        | Nigeria  | NIE08_2194                   | 2009 |
| XIV_a  | XIV.1        | <b>XIV.1</b>    | XIV.1    | 1793 | HF969139   | chicken        | Nigeria  | NIE08_2280                   | 2009 |
| XIV_a  | XIV.1        | <b>XIV.1</b>    | XIV.1    | 1794 | HF969144   | chicken        | Nigeria  | NIE09_2009                   | 2009 |
| XIV_a  | XIV.1        | <b>XIV.1</b>    | XIV.1    | 1795 | HF969150   | chicken        | Nigeria  | NIE09_2044                   | 2009 |

|       |       |              |       |      |          |         |         |             |      |
|-------|-------|--------------|-------|------|----------|---------|---------|-------------|------|
| XIV_a | XIV.1 | <b>XIV.1</b> | XIV.1 | 1796 | HF969155 | chicken | Nigeria | NIE09_2087  | 2009 |
| XIV_a | XIV.1 | <b>XIV.1</b> | XIV.1 | 1797 | HF969167 | turkey  | Nigeria | NIE10_082   | 2011 |
| XIV_a | XIV.1 | <b>XIV.1</b> | XIV.1 | 1798 | HF969186 | chicken | Nigeria | NIE07_125   | 2007 |
| XIV_a | XIV.1 | <b>XIV.1</b> | XIV.1 | 1799 | HF969193 | chicken | Nigeria | NIE08_2150  | 2009 |
| XIV_a | XIV.1 | <b>XIV.1</b> | XIV.1 | 1800 | HF969200 | chicken | Nigeria | NIE08_2362  | 2009 |
| XIV_a | XIV.1 | <b>XIV.1</b> | XIV.1 | 1801 | HF969205 | turkey  | Nigeria | NIE09_2071  | 2009 |
| XIV_a | XIV.1 | <b>XIV.1</b> | XIV.1 | 1802 | JN872165 | chicken | Niger   | VIR_1377_7_ | 2006 |
| XIV_a | XIV.1 | <b>XIV.1</b> | XIV.1 | 1803 | JQ039386 | chicken | Nigeria | VRD08_36    | 2008 |
| XIV_b | XIV.2 | <b>XIV.2</b> | XIV.2 | 1807 | HF969133 | chicken | Nigeria | NIE08_2159  | 2009 |
| XIV_b | XIV.2 | <b>XIV.2</b> | XIV.2 | 1808 | HF969141 | chicken | Nigeria | NIE08_2359  | 2009 |
| XIV_b | XIV.2 | <b>XIV.2</b> | XIV.2 | 1809 | HF969142 | chicken | Nigeria | NIE09_1596  | 2009 |
| XIV_b | XIV.2 | <b>XIV.2</b> | XIV.2 | 1810 | HF969143 | chicken | Nigeria | NIE09_1597  | 2009 |
| XIV_b | XIV.2 | <b>XIV.2</b> | XIV.2 | 1811 | HF969145 | chicken | Nigeria | NIE09_2014  | 2009 |
| XIV_b | XIV.2 | <b>XIV.2</b> | XIV.2 | 1812 | HF969146 | chicken | Nigeria | NIE09_2017  | 2009 |
| XIV_b | XIV.2 | <b>XIV.2</b> | XIV.2 | 1813 | HF969149 | chicken | Nigeria | NIE09_2041  | 2009 |
| XIV_b | XIV.2 | <b>XIV.2</b> | XIV.2 | 1814 | HF969151 | chicken | Nigeria | NIE09_2053  | 2009 |
| XIV_b | XIV.2 | <b>XIV.2</b> | XIV.2 | 1815 | HF969157 | chicken | Nigeria | NIE09_2166  | 2009 |
| XIV_b | XIV.2 | <b>XIV.2</b> | XIV.2 | 1816 | HF969161 | chicken | Nigeria | NIE10_024   | 2011 |
| XIV_b | XIV.2 | <b>XIV.2</b> | XIV.2 | 1817 | HF969162 | chicken | Nigeria | NIE10_032   | 2011 |
| XIV_b | XIV.2 | <b>XIV.2</b> | XIV.2 | 1818 | HF969163 | chicken | Nigeria | NIE10_034   | 2011 |
| XIV_b | XIV.2 | <b>XIV.2</b> | XIV.2 | 1819 | HF969164 | chicken | Nigeria | NIE10_041   | 2011 |
| XIV_b | XIV.2 | <b>XIV.2</b> | XIV.2 | 1820 | HF969165 | chicken | Nigeria | NIE10_043   | 2011 |
| XIV_b | XIV.2 | <b>XIV.2</b> | XIV.2 | 1821 | HF969166 | chicken | Nigeria | NIE10_076   | 2011 |
| XIV_b | XIV.2 | <b>XIV.2</b> | XIV.2 | 1822 | HF969169 | chicken | Nigeria | NIE10_150   | 2011 |
| XIV_b | XIV.2 | <b>XIV.2</b> | XIV.2 | 1823 | HF969170 | chicken | Nigeria | NIE10_160   | 2011 |
| XIV_b | XIV.2 | <b>XIV.2</b> | XIV.2 | 1824 | HF969172 | chicken | Nigeria | NIE10_258   | 2011 |
| XIV_b | XIV.2 | <b>XIV.2</b> | XIV.2 | 1825 | HF969173 | chicken | Nigeria | NIE10_302   | 2011 |
| XIV_b | XIV.2 | <b>XIV.2</b> | XIV.2 | 1826 | HF969177 | chicken | Nigeria | NIE10_409   | 2011 |
| XIV_b | XIV.2 | <b>XIV.2</b> | XIV.2 | 1827 | HF969178 | chicken | Nigeria | NIE08_2270  | 2009 |
| XIV_b | XIV.2 | <b>XIV.2</b> | XIV.2 | 1828 | HF969187 | chicken | Nigeria | NIE08_0453  | 2008 |
| XIV_b | XIV.2 | <b>XIV.2</b> | XIV.2 | 1829 | HF969190 | chicken | Nigeria | NIE08_2032  | 2009 |
| XIV_b | XIV.2 | <b>XIV.2</b> | XIV.2 | 1830 | HF969198 | chicken | Nigeria | NIE08_2279  | 2009 |
| XIV_b | XIV.2 | <b>XIV.2</b> | XIV.2 | 1831 | HF969202 | chicken | Nigeria | NIE09_2013  | 2009 |
| XIV_b | XIV.2 | <b>XIV.2</b> | XIV.2 | 1832 | HF969203 | turkey  | Nigeria | NIE09_2021  | 2009 |
| XIV_b | XIV.2 | <b>XIV.2</b> | XIV.2 | 1833 | HF969210 | chicken | Nigeria | NIE10_139   | 2011 |
| XIV_b | XIV.2 | <b>XIV.2</b> | XIV.2 | 1834 | HF969211 | chicken | Nigeria | NIE10_263   | 2011 |
| XIV_b | XIV.2 | <b>XIV.2</b> | XIV.2 | 1835 | HF969212 | chicken | Nigeria | NIE10_318   | 2011 |
| XIV_b | XIV.2 | <b>XIV.2</b> | XIV.2 | 1836 | HF969213 | chicken | Nigeria | NIE10_325   | 2011 |
| XIV_b | XIV.2 | <b>XIV.2</b> | XIV.2 | 1837 | HF969214 | chicken | Nigeria | NIE10_333   | 2011 |
| XIV_b | XIV.2 | <b>XIV.2</b> | XIV.2 | 1838 | JQ039390 | chicken | Nigeria | VRD07_233   | 2007 |
| XIV_b | XIV.2 | <b>XIV.2</b> | XIV.2 | 1839 | JX546245 | chicken | Benin   | 463MT       | 2009 |

|       |       |              |       |      |          |                 |         |                         |      |
|-------|-------|--------------|-------|------|----------|-----------------|---------|-------------------------|------|
| XIV_b | XIV.2 | <b>XIV.2</b> | XIV.2 | 1840 | KC568206 | guinea_fowl     | Nigeria | NG_706_JG_KZ_14T        | 2009 |
| XIV_b | XIV.2 | <b>XIV.2</b> | XIV.2 | 1841 | KT948996 | duck            | Nigeria | NG_695_KG_LOM_11_16     | 2009 |
| XIV_b | XIV.2 | <b>XIV.2</b> | XIV.2 | 1842 | KY171989 | chicken         | Nigeria | VRD10_143_N68_913       | 2010 |
| XIV_b | XIV.2 | <b>XIV.2</b> | XIV.2 | 1843 | KY171990 | chicken         | Nigeria | KD_TW_03T_N45_720       | 2009 |
| XIV_b | XIV.2 | <b>XIV.2</b> | XIV.2 | 1844 | KY171993 | chicken         | Nigeria | VRD09_031_N23_715       | 2009 |
| XIV_b | XIV.2 | <b>XIV.2</b> | XIV.2 | 1845 | KY171994 | chicken         | Nigeria | VRD09_001_N19_714       | 2009 |
| XIV_b | XIV.2 | <b>XIV.2</b> | XIV.2 | 2362 | MH996919 | Turkey          | Nigeria | JG_DT_30_31T_N18        | 2009 |
| XIV_b | XIV.2 | <b>XIV.2</b> | XIV.2 | 2365 | MH996922 | pigeon          | Nigeria | KT_MSH_15C_N2           | 2009 |
| XIV_b | XIV.2 | <b>XIV.2</b> | XIV.2 | 2366 | MH996923 | Wild_bird_eagle | Nigeria | VRD09_546_N4            | 2009 |
| XIV_b | XIV.2 | <b>XIV.2</b> | XIV.2 | 2370 | MH996927 | chicken         | Nigeria | VRD09_340_N50           | 2009 |
| XIV_b | XIV.2 | <b>XIV.2</b> | XIV.2 | 2373 | MH996930 | chicken         | Nigeria | JN_469_N44              | 2009 |
| XIV_b | XIV.2 | <b>XIV.2</b> | XIV.2 | 2381 | MH996938 | domestic_duck   | Nigeria | JG_SH_47C_N15           | 2009 |
| XIV_b | XIV.2 | <b>XIV.2</b> | XIV.2 | 2384 | MH996941 | chicken         | Nigeria | NS_KF_6_09C_N46         | 2009 |
| XIV_b | XIV.2 | <b>XIV.2</b> | XIV.2 | 2385 | MH996942 | domestic_duck   | Nigeria | GM_GMM_17_18T_N14       | 2009 |
| XIV_b | XIV.2 | <b>XIV.2</b> | XIV.2 | 2386 | MH996943 | pigeon          | Nigeria | YB_GSH1_4_6T_N3         | 2009 |
| XIV_b | XIV.2 | <b>XIV.2</b> | XIV.2 | 2388 | MH996945 | chicken         | Nigeria | VRD09_25_N21            | 2009 |
| XIV_b | XIV.2 | <b>XIV.2</b> | XIV.2 | 2389 | MH996946 | chicken         | Nigeria | KT_JBY_09T_N40          | 2009 |
| XIV_b | XIV.2 | <b>XIV.2</b> | XIV.2 | 2397 | MH996954 | chicken         | Nigeria | Dundubus_VRD255_62      | 2010 |
| XIV_b | XIV.2 | <b>XIV.2</b> | XIV.2 | 2398 | MH996955 | chicken         | Nigeria | VRD158A_70              | 2013 |
| XIV_b | XIV.2 | <b>XIV.2</b> | XIV.2 | 2399 | MH996956 | chicken         | Nigeria | Kaduna_VRD401_17        | 2006 |
| XIV_b | XIV.2 | <b>XIV.2</b> | XIV.2 | 2400 | MH996957 | chicken         | Nigeria | Kurmi_VRD033_23         | 2007 |
| XIV_b | XIV.2 | <b>XIV.2</b> | XIV.2 | 2401 | MH996958 | chicken         | Nigeria | Kwara_VRD415_57         | 2009 |
| XIV_b | XIV.2 | <b>XIV.2</b> | XIV.2 | 2402 | MH996959 | chicken         | Nigeria | Vom_VRD216_73           | 2013 |
| XIV_b | XIV.2 | <b>XIV.2</b> | XIV.2 | 2403 | MH996960 | chicken         | Nigeria | Katsina_KT_CH_C18_22_74 | 2008 |
| XIV_b | XIV.2 | <b>XIV.2</b> | XIV.2 | 2423 | MH996980 | chicken         | Nigeria | Vwang_VRD97_67          | 2013 |
| XIV_b | XIV.2 | <b>XIV.2</b> | XIV.2 | 2424 | MH996981 | chicken         | Nigeria | VRD798_XIV_15_798       | 2015 |
| XIV_b | XIV.2 | <b>XIV.2</b> | XIV.2 | 2429 | MH996986 | chicken         | Nigeria | VRD599_59               | 2009 |
| XIV_b | XIV.2 | <b>XIV.2</b> | XIV.2 | 2430 | MH996987 | chicken         | Nigeria | Kogi_VRD578_60          | 2009 |
| XIV_b | XIV.2 | <b>XIV.2</b> | XIV.2 | 2432 | MH996989 | chicken         | Nigeria | Dutse_JG_DT_C32_36_102  | 2010 |
| V_a   | XIX   | <b>XIX</b>   | XIX   | 463  | FJ705456 | cormorant       | USA_MN_ | MN_92_40140             | 1992 |
| V_a   | XIX   | <b>XIX</b>   | XIX   | 464  | FJ705457 | cormorant       | USA     | CA_97_23071             | 1997 |
| V_a   | XIX   | <b>XIX</b>   | XIX   | 465  | FJ705458 | cormorant       | USA_CA_ | CA_D9704285             | 1997 |
| V_a   | XIX   | <b>XIX</b>   | XIX   | 466  | FJ705459 | cormorant       | Canada  | 98CNN3_V1125            | 1998 |
| V_a   | XIX   | <b>XIX</b>   | XIX   | 467  | FJ705460 | cormorant       | Canada  | 95DC02150               | 1995 |
| V_a   | XIX   | <b>XIX</b>   | XIX   | 468  | FJ705461 | cormorant       | Canada  | 95DC2345                | 1995 |
| V_a   | XIX   | <b>XIX</b>   | XIX   | 469  | FJ705463 | cormorant       | USA_    | NV_19529_04             | 2005 |
| V_a   | XIX   | <b>XIX</b>   | XIX   | 470  | GU332655 | cormorant       | USA_    | 496                     | 2008 |
| V_a   | XIX   | <b>XIX</b>   | XIX   | 471  | GU332662 | cormorant       | USA_    | 503                     | 2008 |
| V_a   | XIX   | <b>XIX</b>   | XIX   | 472  | GU332663 | cormorant       | USA_    | 506                     | 2008 |
| V_a   | XIX   | <b>XIX</b>   | XIX   | 473  | JN255775 | cormorant       | USA     | MA_651                  | 2010 |
| V_a   | XIX   | <b>XIX</b>   | XIX   | 474  | JN255777 | Great_Cormorant | USA     | HN_654                  | 2010 |

|        |      |             |      |      |          |                         |                    |                         |      |
|--------|------|-------------|------|------|----------|-------------------------|--------------------|-------------------------|------|
| V_a    | XIX  | <b>XIX</b>  | XIX  | 475  | JN255778 | great_black_backed_gull | USA                | 655                     | 2010 |
| V_a    | XIX  | <b>XIX</b>  | XIX  | 476  | JN255779 | herring_gull            | USA                | 656                     | 2010 |
| V_a    | XIX  | <b>XIX</b>  | XIX  | 477  | JN255781 | cormorant               | USA                | ME_658_                 | 2010 |
| V_a    | XIX  | <b>XIX</b>  | XIX  | 478  | JN255782 | cormorant               | USA                | ME_659                  | 2010 |
| V_a    | XIX  | <b>XIX</b>  | XIX  | 479  | JN255784 | cormorant               | USA                | MN_648                  | 2010 |
| V_a    | XIX  | <b>XIX</b>  | XIX  | 480  | JN255785 | cormorant               | USA                | HN_652                  | 2010 |
| V_a    | XIX  | <b>XIX</b>  | XIX  | 481  | JN872159 | cormorant               | USA                | Wisconsin_451287_11_06_ | 2006 |
| V_a    | XIX  | <b>XIX</b>  | XIX  | 482  | JN872161 | cormorant               | USA                | Wisconsin_498260_2_07_  | 1997 |
| V_a    | XIX  | <b>XIX</b>  | XIX  | 483  | JN941988 | cormorant               | USA                | Florida_66638_          | 2010 |
| V_a    | XIX  | <b>XIX</b>  | XIX  | 484  | JN941991 | cormorant               | USA                | Wisconsin_1718_         | 2008 |
| V_a    | XIX  | <b>XIX</b>  | XIX  | 485  | JN941993 | pelican                 | USA                | Wisconsin_2415_02_      | 2008 |
| V_a    | XIX  | <b>XIX</b>  | XIX  | 486  | JN942020 | cormorant               | USA                | Oregon_399448_          | 2005 |
| V_a    | XIX  | <b>XIX</b>  | XIX  | 487  | JN942023 | cormorant               | USA                | Oregon_276236_7_        | 2003 |
| V_a    | XIX  | <b>XIX</b>  | XIX  | 488  | JN942024 | cormorant               | USA                | Wisconsin_272409_       | 2003 |
| V_a    | XIX  | <b>XIX</b>  | XIX  | 489  | JN942026 | Cormorant               | USA                | New_York_268898_7       | 2003 |
| V_a    | XIX  | <b>XIX</b>  | XIX  | 490  | JN942029 | cormorant               | USA                | Wisconsin_248           | 1998 |
| V_a    | XIX  | <b>XIX</b>  | XIX  | 491  | JN942030 | cormorant               | USA                | Wisconsin_28547         | 1997 |
| V_a    | XIX  | <b>XIX</b>  | XIX  | 492  | JN942035 | cormorant               | USA                | North_Dakota_43888_6    | 1992 |
| V_a    | XIX  | <b>XIX</b>  | XIX  | 493  | JN942036 | turkey                  | USA                | North_Dakota_43084_25   | 1992 |
| V_a    | XIX  | <b>XIX</b>  | XIX  | 494  | JN942038 | cormorant               | USA                | Michigan_38819_5        | 1992 |
| V_a    | XIX  | <b>XIX</b>  | XIX  | 495  | JN942097 | cormorant               | USA                | Wisconsin_1926_         | 2008 |
| V_a    | XIX  | <b>XIX</b>  | XIX  | 496  | KC130083 | cormorant               | USA                | Delaware_39840_2        | 2010 |
| V_a    | XIX  | <b>XIX</b>  | XIX  | 497  | KC433530 | cormorant               | USA                | Florida_41105           | 2012 |
| V_a    | XIX  | <b>XIX</b>  | XIX  | 498  | KC433532 | cormorant               | USA                | Florida_42884           | 2012 |
| V_a    | XIX  | <b>XIX</b>  | XIX  | 2318 | MH392216 | cormorant               | USA_MN_            | 92_40140_250            | 1992 |
| XVI    | XVI  | <b>XVI</b>  | XVI  | 1854 | JX119193 | chicken                 | Dominican_Republic | 499_31                  | 2008 |
| XVI    | XVI  | <b>XVI</b>  | XVI  | 1855 | JX186997 | chicken                 | Dominican_Republic | 867                     | 2008 |
| XVI    | XVI  | <b>XVI</b>  | XVI  | 1856 | JX915242 | chicken                 | Dominican_Republic | 28138_4                 | 1986 |
| XVI    | XVI  | <b>XVI</b>  | XVI  | 1857 | JX915243 | chicken                 | Mexico             | Queretaro_452_1947      | 1947 |
| XVII   | XVII | <b>XVII</b> | XVII | 1860 | HF969125 | chicken                 | CAR                | CAF09_014               | 2008 |
| XVII   | XVII | <b>XVII</b> | XVII | 1861 | HF969180 | _                       | Cameroon           | CAE08_318               | 2009 |
| XVII   | XVII | <b>XVII</b> | XVII | 1862 | HF969182 | chicken                 | CAR                | CAF09_016               | 2009 |
| XVII   | XVII | <b>XVII</b> | XVII | 1865 | KU058680 | chicken                 | Nigeria            | Kudu_113_N56_           | 1992 |
| XVII_a | XVII | <b>XVII</b> | XVII | 1869 | FJ772449 | _                       | Nigeria            | 913_33                  | 2006 |
| XVII_a | XVII | <b>XVII</b> | XVII | 1870 | FJ772458 | chicken                 | Burkina_Faso       | 2415_361                | 2008 |
| XVII_a | XVII | <b>XVII</b> | XVII | 1871 | FJ772463 | chicken                 | Burkina_Faso       | 2415_580                | 2008 |
| XVII_a | XVII | <b>XVII</b> | XVII | 1872 | FJ772469 | chicken                 | Niger              | 2602_348                | 2008 |
| XVII_a | XVII | <b>XVII</b> | XVII | 1873 | FJ772472 | chicken                 | Niger              | 2602_468                | 2008 |
| XVII_a | XVII | <b>XVII</b> | XVII | 1874 | FJ772475 | chicken                 | Nigeri             | 2602_605                | 2008 |
| XVII_a | XVII | <b>XVII</b> | XVII | 1875 | FJ772478 | chicken                 | Cameroon           | 3490_149                | 2008 |
| XVII_a | XVII | <b>XVII</b> | XVII | 1876 | FJ772481 | chicken                 | Niger              | 2602_625                | 2008 |

|        |      |             |      |      |          |             |             |                       |      |
|--------|------|-------------|------|------|----------|-------------|-------------|-----------------------|------|
| XVII_a | XVII | <b>XVII</b> | XVII | 1877 | FJ772484 | chicken     | Cameroon    | _3490_147             | 2008 |
| XVII_a | XVII | <b>XVII</b> | XVII | 1878 | FJ772486 | _           | Nigeria     | 3724_6                | 2008 |
| XVII_a | XVII | <b>XVII</b> | XVII | 1879 | HF969129 | chicken     | Nigeria     | NIE08_1363            | 2008 |
| XVII_a | XVII | <b>XVII</b> | XVII | 1880 | HF969130 | guinea_fowl | Nigeria     | NIE08_2004            | 2009 |
| XVII_a | XVII | <b>XVII</b> | XVII | 1881 | HF969132 | chicken     | Nigeria     | NIE08_2149            | 2009 |
| XVII_a | XVII | <b>XVII</b> | XVII | 1882 | HF969134 | chicken     | Nigeria     | NIE08_2168            | 2009 |
| XVII_a | XVII | <b>XVII</b> | XVII | 1883 | HF969135 | chicken     | Nigeria     | NIE08_2187            | 2009 |
| XVII_a | XVII | <b>XVII</b> | XVII | 1884 | HF969138 | chicken     | Nigeria     | NIE08_2224            | 2009 |
| XVII_a | XVII | <b>XVII</b> | XVII | 1885 | HF969140 | chicken     | Nigeria     | NIE08_2340            | 2009 |
| XVII_a | XVII | <b>XVII</b> | XVII | 1886 | HF969148 | chicken     | Nigeria     | NIE09_2034            | 2009 |
| XVII_a | XVII | <b>XVII</b> | XVII | 1887 | HF969152 | chicken     | Nigeria     | NIE09_2072            | 2009 |
| XVII_a | XVII | <b>XVII</b> | XVII | 1888 | HF969168 | chicken     | Nigeria     | NIE10_124             | 2011 |
| XVII_a | XVII | <b>XVII</b> | XVII | 1889 | HF969174 | chicken     | Nigeria     | NIE10_304             | 2011 |
| XVII_a | XVII | <b>XVII</b> | XVII | 1890 | HF969175 | chicken     | Nigeria     | NIE10_306             | 2011 |
| XVII_a | XVII | <b>XVII</b> | XVII | 1891 | HF969176 | chicken     | Nigeria     | NIE10_310             | 2011 |
| XVII_a | XVII | <b>XVII</b> | XVII | 1892 | HF969184 | chicken     | Ivory_Coast | CIV08_103             | 2007 |
| XVII_a | XVII | <b>XVII</b> | XVII | 1893 | HF969185 | chicken     | Ivory_Coast | CIV08_104             | 2007 |
| XVII_a | XVII | <b>XVII</b> | XVII | 1894 | HF969188 | chicken     | Nigeria     | NIE08_1365            | 2008 |
| XVII_a | XVII | <b>XVII</b> | XVII | 1895 | HF969191 | chicken     | Nigeria     | NIE08_2042            | 2009 |
| XVII_a | XVII | <b>XVII</b> | XVII | 1896 | HF969192 | chicken     | Nigeria     | NIE08_2119            | 2009 |
| XVII_a | XVII | <b>XVII</b> | XVII | 1897 | HF969195 | chicken     | Nigeria     | NIE08_2247            | 2009 |
| XVII_a | XVII | <b>XVII</b> | XVII | 1898 | HF969197 | chicken     | Nigeria     | NIE08_2267            | 2009 |
| XVII_a | XVII | <b>XVII</b> | XVII | 1899 | HF969199 | chicken     | Nigeria     | NIE08_2349            | 2009 |
| XVII_a | XVII | <b>XVII</b> | XVII | 1900 | HF969204 | chicken     | Nigeria     | NIE09_2028            | 2009 |
| XVII_a | XVII | <b>XVII</b> | XVII | 1901 | HF969207 | _           | Nigeria     | NIE09_2167            | 2009 |
| XVII_a | XVII | <b>XVII</b> | XVII | 1902 | HF969209 | chicken     | Nigeria     | NIE10_123             | 2011 |
| XVII_a | XVII | <b>XVII</b> | XVII | 1903 | HF969215 | chicken     | Nigeria     | NIE10_335             | 2011 |
| XVII_a | XVII | <b>XVII</b> | XVII | 1904 | JF966385 | chicken     | Mali        | ML007                 | 2008 |
| XVII_a | XVII | <b>XVII</b> | XVII | 1905 | JQ039393 | chicken     | Nigeria     | VRD07_141             | 2007 |
| XVII_a | XVII | <b>XVII</b> | XVII | 1906 | JQ039394 | chicken     | Nigeria     | VRD07_410             | 2007 |
| XVII_a | XVII | <b>XVII</b> | XVII | 1909 | JX546247 | chicken     | Benin       | 488MT                 | 2009 |
| XVII_a | XVII | <b>XVII</b> | XVII | 1910 | KC568204 | pigeon      | Nigeria     | ZM_KN_PG01_N1_688     | 2009 |
| XVII_a | XVII | <b>XVII</b> | XVII | 1911 | KC568208 | chicken     | Nigeria     | NG_710_GM_PLBM_10_12T | 2009 |
| XVII_a | XVII | <b>XVII</b> | XVII | 1912 | KY171991 | quail       | Nigeria     | VRD17_04_N2_861       | 2004 |
| XVII_a | XVII | <b>XVII</b> | XVII | 1913 | KY171992 | chicken     | Nigeria     | JN_469_N44_892        | 2009 |
| XVII_a | XVII | <b>XVII</b> | XVII | 1914 | KY171995 | chicken     | Nigeria     | VRD124_06_N11_867     | 2006 |
| XVII_a | XVII | <b>XVII</b> | XVII | 1915 | KY292310 | quail       | Nigeria     | VRD08_385_N23         | 2009 |
| XVII_b | XVII | <b>XVII</b> | XVII | 1935 | FJ772446 | _           | Nigeria     | 913_1                 | 2006 |
| XVII_b | XVII | <b>XVII</b> | XVII | 1936 | HF969128 | _           | Nigeria     | NIE07_216             | 2007 |
| XVII_b | XVII | <b>XVII</b> | XVII | 1937 | HF969171 | chicken     | Nigeria     | NIE10_182             | 2011 |
| XVII_b | XVII | <b>XVII</b> | XVII | 1938 | HF969194 | chicken     | Nigeria     | NIE08_2199            | 2009 |

|         |         |                |         |      |          |                   |             |                                |           |
|---------|---------|----------------|---------|------|----------|-------------------|-------------|--------------------------------|-----------|
| XVII_b  | XVII    | <b>XVII</b>    | XVII    | 1939 | HF969196 | chicken           | Nigeria     | NIE08_2261                     | 2009      |
| XVII_b  | XVII    | <b>XVII</b>    | XVII    | 1940 | KF442614 | chicken           | Nigeria     | 228_7                          | 2006      |
| XVII_a  | XVII    | <b>XVII</b>    | XVII    | 2151 | MH092810 | duck              | Kanam       | Nigeria_KN_399_N26             | 2009      |
| XVII_a  | XVII    | <b>XVII</b>    | XVII    | 2361 | MH996918 | domestic_duck     | Nigeria     | BA_BAU_R_07T_N17               | 2009      |
| XVII_a  | XVII    | <b>XVII</b>    | XVII    | 2368 | MH996925 | chicken           | Nigeria     | BA_TFB_14C_N38                 | 2009      |
| XVII_a  | XVII    | <b>XVII</b>    | XVII    | 2369 | MH996926 | chicken           | Nigeria     | BO_MMC_AGN_6_07T_N42           | 2009      |
| XVII_a  | XVII    | <b>XVII</b>    | XVII    | 2374 | MH996931 | Guinea_fowl       | Nigeria     | KT_MA_5_6C_N7                  | 2009      |
| XVII_a  | XVII    | <b>XVII</b>    | XVII    | 2375 | MH996932 | Vulture           | Nigeria     | PL038_N47                      | 2002_2003 |
| XVII_a  | XVII    | <b>XVII</b>    | XVII    | 2376 | MH996933 | chicken           | Nigeria     | LTS_11T_N38                    | 2009      |
| XVII_a  | XVII    | <b>XVII</b>    | XVII    | 2378 | MH996935 | duck              | Nigeria     | YB_GSHI_07T_N5                 | 2009      |
| XVII_a  | XVII    | <b>XVII</b>    | XVII    | 2382 | MH996939 | domestic_duck     | Nigeria     | JG_SH_47C_N15                  | 2009      |
| XVII_a  | XVII    | <b>XVII</b>    | XVII    | 2404 | MH996961 | chicken           | Nigeria     | Jos_VRD234_7                   | 2002      |
| XVII_a  | XVII    | <b>XVII</b>    | XVII    | 2406 | MH996963 | chicken           | Nigeria     | VRD21_63                       | 2011      |
| XVII_a  | XVII    | <b>XVII</b>    | XVII    | 2407 | MH996964 | chicken           | Nigeria     | VRD64_66                       | 2012      |
| XVII_a  | XVII    | <b>XVII</b>    | XVII    | 2408 | MH996965 | duck              | Nigeria     | Keffi_NS_KR_DK56_57_93         | 2010      |
| XVII_a  | XVII    | <b>XVII</b>    | XVII    | 2409 | MH996966 | chicken           | Nigeria     | Azare_BA_AZR_C6_7_96           | 2010      |
| XVII_a  | XVII    | <b>XVII</b>    | XVII    | 2412 | MH996969 | chicken           | Nigeria     | Bauchi_VRD154_14               | 2005      |
| XVII_a  | XVII    | <b>XVII</b>    | XVII    | 2413 | MH996970 | chicken           | Nigeria     | Zaria_VRD646_19                | 2006      |
| XVII_a  | XVII    | <b>XVII</b>    | XVII    | 2414 | MH996971 | chicken           | Nigeria     | T_Wada_VRD647_20               | 2006      |
| XVII_a  | XVII    | <b>XVII</b>    | XVII    | 2416 | MH996973 | chicken           | Nigeria     | Katsina_VRD221_40              | 2007      |
| XVII_a  | XVII    | <b>XVII</b>    | XVII    | 2417 | MH996974 | chicken           | Nigeria     | Fune_VRD284_44                 | 2007      |
| XVII_a  | XVII    | <b>XVII</b>    | XVII    | 2418 | MH996975 | chicken           | Nigeria     | P_Harcourt_VRD289_46           | 2007      |
| XVII_a  | XVII    | <b>XVII</b>    | XVII    | 2419 | MH996976 | chicken           | Nigeria     | Gombe_VRD316_56                | 2008      |
| XVII_a  | XVII    | <b>XVII</b>    | XVII    | 2420 | MH996977 | chicken           | Nigeria     | Jigawa_JG_BR_T15_101           | 2010      |
| XVII_a  | XVII    | <b>XVII</b>    | XVII    | 2421 | MH996978 | chicken           | Nigeria     | Jos_VRD152_9                   | 2003      |
| XVII_a  | XVII    | <b>XVII</b>    | XVII    | 2425 | MH996982 | chicken           | Nigeria     | Owerri_west_VRD798_XVII_15_798 | 2015      |
| XVII_a  | XVII    | <b>XVII</b>    | XVII    | 2426 | MH996983 | chicken           | Nigeria     | Nassarawa_VRD235_15_235        | 2015      |
| XVII_a  | XVII    | <b>XVII</b>    | XVII    | 2427 | MH996984 | chicken           | Nigeria     | Katsina_KT_MG_C2_3_75          | 2011      |
| XVII_a  | XVII    | <b>XVII</b>    | XVII    | 2428 | MH996985 | chicken           | Nigeria     | VRD25_12                       | 2005      |
| XVII_a  | XVII    | <b>XVII</b>    | XVII    | 2431 | MH996988 | chicken           | Nigeria     | Keffu_NS_KF_C13_17_90          | 2010      |
| XVII_a  | XVII    | <b>XVII</b>    | XVII    | 2433 | MH996990 | chicken           | Nigeria     | Dutse_JG_DT_C32_36_102         | 2010      |
| XVII_a  | XVII    | <b>XVII</b>    | XVII    | 2434 | MH996991 | chicken           | Nigeria     | Katsina_KT_MDWT3_4_104         | 2011      |
| XVIII_a | XVIII.1 | <b>XVIII.1</b> | XVIII.1 | 1942 | FJ772455 | _                 | Mauritania  | 1532_14                        | 2006      |
| XVIII_a | XVIII.1 | <b>XVIII.1</b> | XVIII.1 | 1943 | HF969179 | chicken           | Ivory_Coast | CIV08_026                      | 2007      |
| XVIII_a | XVIII.1 | <b>XVIII.1</b> | XVIII.1 | 1944 | JF966387 | chicken           | Mali        | ML008                          | 2009      |
| XVIII_a | XVIII.1 | <b>XVIII.1</b> | XVIII.1 | 1945 | JF966388 | chicken           | Mali        | ML225                          | 2008      |
| XVIII_a | XVIII.1 | <b>XVIII.1</b> | XVIII.1 | 1946 | JF966389 | guinea_fowl       | Mali        | ML038                          | 2007      |
| XVIII_a | XVIII.1 | <b>XVIII.1</b> | XVIII.1 | 1947 | JN872157 | Green_Wood_Hooper | EH          | 5801_22                        | 2010      |
| XVIII_a | XVIII.1 | <b>XVIII.1</b> | XVIII.1 | 1948 | JX518885 | chicken           | Mali        | ML57051T                       | 2010      |
| XVIII_b | XVIII.2 | <b>XVIII.2</b> | XVIII.2 | 1950 | FJ772466 | chicken           | IvoryCoast  | 2601                           | 2008      |
| XVIII_b | XVIII.2 | <b>XVIII.2</b> | XVIII.2 | 1951 | HF969126 | duck              | Ivory_Coast | CIV08_062                      | 2006      |

|         |                |                |         |      |            |                |             |                               |      |
|---------|----------------|----------------|---------|------|------------|----------------|-------------|-------------------------------|------|
| XVIII_b | XVIII.2        | <b>XVIII.2</b> | XVIII.2 | 1952 | HF969216   | chicken        | Nigeria     | NIE11_1286                    | 2011 |
| XVIII_b | XVIII.2        | <b>XVIII.2</b> | XVIII.2 | 1953 | HF969217   | chicken        | Nigeria     | NIE10_171                     | 2011 |
| XVIII_b | XVIII.2        | <b>XVIII.2</b> | XVIII.2 | 1954 | HF969218   | chicken        | Ivory_Coast | CIV08_042                     | 2007 |
| XVIII_b | XVIII.2        | <b>XVIII.2</b> | XVIII.2 | 1955 | HG326600   | village_weaver | Ivory_Coast | CIV08_032                     | 2006 |
| XVIII_b | XVIII.2        | <b>XVIII.2</b> | XVIII.2 | 1956 | JN942101   | finch          | EH          | FinEastern_Hemisphere_1409_12 | 2008 |
| XVIII_b | XVIII.2        | <b>XVIII.2</b> | XVIII.2 | 1957 | JX518886   | chicken        | Mali        | ML57072T                      | 2010 |
| XVIII_b | XVIII.2        | <b>XVIII.2</b> | XVIII.2 | 1958 | JX546248   | chicken        | Togo        | AKO18                         | 2009 |
| XVIII_b | XVIII.2        | <b>XVIII.2</b> | XVIII.2 | 2329 | MH392227   | chicken        | Nigeria     | OOT_4_1_N69_914               | 2009 |
| VI_c    | XX             | <b>XX</b>      | XX      | 669  | AB465606   | chicken        | Japan       | Ibaraki                       | 1985 |
| VI_c    | XX             | <b>XX</b>      | XX      | 670  | AB853928   | chicken        | Japan       | Ibaraki_SM87                  | 1987 |
| VI_c    | XX             | <b>XX</b>      | XX      | 671  | AF458015   | chicken        | China       | ZhJ_3                         | 1997 |
| VI_c    | XX             | <b>XX</b>      | XX      | 672  | AF458016   | chicken        | China       | ZhJ_2                         | 1986 |
| VI_c    | XX             | <b>XX</b>      | XX      | 673  | AF458017   | chicken        | China       | Sh_2                          | 1998 |
| VI_c    | XX             | <b>XX</b>      | XX      | 674  | AF458018   | chicken        | China       | Sh_1                          | 1997 |
| VI_c    | XX             | <b>XX</b>      | XX      | 675  | EF589137   | pigeon         | China       | GZ_Guizhou                    | _    |
| VI_c    | XX             | <b>XX</b>      | XX      | 676  | HQ839733   | chicken        | Sweden      |                               | 1995 |
| VI_c    | XX             | <b>XX</b>      | XX      | 677  | KC853020   | crested_ibis   | China       | Shaanxi10                     | 2010 |
| VI_c    | XX             | <b>XX</b>      | XX      | 678  | KU373026   | ostrich        | China       | SX_O1                         | 2006 |
| VI_c    | XX             | <b>XX</b>      | XX      | 679  | KY042125   | chicken        | Bulgaria    | DolnoLinevo                   | 1992 |
| VI_c    | XX             | <b>XX</b>      | XX      | 683  | AF458020   | chicken        | China       | ZJ_1                          | 1991 |
| VI_c    | XX             | <b>XX</b>      | XX      | 684  | AF458021   | chicken        | China       | JX_1                          | 1994 |
| VI_c    | XX             | <b>XX</b>      | XX      | 685  | GQ507801   | chicken        | South_Korea | Kr_102                        | 1989 |
| VI_c    | XX             | <b>XX</b>      | XX      | 686  | KY042142   | quail_         | Korea       | 88_M                          | 1988 |
| VI_c    | XX             | <b>XX</b>      | XX      | 687  | KY042143   | chicken        | Korea       | 93_58GG                       | 1993 |
| VI_c    | XX             | <b>XX</b>      | XX      | 2004 | MF278934.1 | pigeon         | China       | GZ_HD_PN                      | 2011 |
| VI_l    | XXI            | <b>XXI</b>     | XXI     | 865  | KC205475   | chicken        | Ethiopia    | ETH10065                      | 2011 |
| VI_l    | XXI            | <b>XXI</b>     | XXI     | 866  | KC205476   | chicken        | Ethiopia    | _ETH_10073                    | 2011 |
| VI_l    | XXI            | <b>XXI</b>     | XXI     | 867  | KC205477   | chicken        | Ethiopia    | ETH8755                       | 2011 |
| VI_l    | XXI            | <b>XXI</b>     | XXI     | 868  | KC205478   | chicken        | Ethiopia    | ETHAN01                       | 2011 |
| VI_l    | XXI            | <b>XXI</b>     | XXI     | 869  | KC205479   | chicken        | Ethiopia    | ETHMG1C                       | 2011 |
| VI_l    | XXI            | <b>XXI</b>     | XXI     | 870  | KJ958913   | chicken        | Ethiopia    | 13VIR3936_1                   | 2012 |
| VI_l    | XXI            | <b>XXI</b>     | XXI     | 871  | KJ958914   | chicken        | Ethiopia    | 13VIR3936_27                  | 2012 |
| VI_g    | <b>XXI.1.1</b> | <b>XXI.1.1</b> | XXI.1.1 | 728  | JF824013   | pigeon         | Russia      | Kemerovo_0267                 | 2009 |
| VI_g    | <b>XXI.1.1</b> | <b>XXI.1.1</b> | XXI.1.1 | 729  | JF824032   | pigeon         | Russia      | Vladimir_687                  | 2005 |
| VI_g    | <b>XXI.1.1</b> | <b>XXI.1.1</b> | XXI.1.1 | 731  | KJ914671   | pigeon         | Ukraine     | Dnipropetrovsk_1_18_11        | 2011 |
| VI_g    | <b>XXI.1.1</b> | <b>XXI.1.1</b> | XXI.1.1 | 732  | KJ914672   | pigeon         | Ukraine     | Ukromne_3_26_11               | 2011 |
| VI_g    | <b>XXI.1.1</b> | <b>XXI.1.1</b> | XXI.1.1 | 733  | KT962979   | pigeon         | Russia      | Altai_777                     | 2010 |
| VI_g    | <b>XXI.1.1</b> | <b>XXI.1.1</b> | XXI.1.1 | 734  | KT965727   | pigeon         | Kazakhstan  | EKO_15                        | 2014 |
| VI_g    | <b>XXI.1.1</b> | <b>XXI.1.1</b> | XXI.1.1 | 735  | KT965728   | pigeon         | Kazakhstan  | Zhambyl_32                    | 2014 |
| VI_g    | <b>XXI.1.1</b> | <b>XXI.1.1</b> | XXI.1.1 | 736  | KX352835   | mallard        | Russia      | Amur_264                      | 2009 |
| VI_g    | <b>XXI.1.1</b> | <b>XXI.1.1</b> | XXI.1.1 | 737  | KY042127   | pigeon         | Ukraine     | Kharkiv_23_01_967             | 2013 |

|      |         |         |         |      |            |                        |          |                            |      |
|------|---------|---------|---------|------|------------|------------------------|----------|----------------------------|------|
| VI_g | XXI.1.1 | XXI.1.1 | XXI.1.1 | 738  | KY042128   | pigeon                 | Ukraine  | Doneck_3                   | 2007 |
| VI_g | XXI.1.1 | XXI.1.1 | XXI.1.1 | 739  | KY042129   | pigeon                 | Egypt    | 11_CL_G1_                  | 2015 |
| VI_g | XXI.1.1 | XXI.1.1 | XXI.1.1 | 740  | KY042130   | pigeon                 | Egypt    | 44_CL_G24_                 | 2015 |
| VI_g | XXI.1.1 | XXI.1.1 | XXI.1.1 | 741  | KY042131   | pigeon                 | Egypt    | 56_CL_G25_                 | 2015 |
| VI_g | XXI.1.1 | XXI.1.1 | XXI.1.1 | 742  | KY042132   | pigeon                 | Egypt    | 73_OP_G29_                 | 2015 |
| VI_g | XXI.1.1 | XXI.1.1 | XXI.1.1 | 743  | KY042134   | pigeon                 | Egypt    | 84_OP_G31_                 | 2015 |
| VI_g | XXI.1.1 | XXI.1.1 | XXI.1.1 | 744  | KY042136   | pigeon                 | Pakistan | Lahore_125                 | 2015 |
| VI_g | XXI.1.1 | XXI.1.1 | XXI.1.1 | 745  | KY042137   | pigeon                 | Pakistan | Jhang_115                  | 2015 |
| VI_g | XXI.1.1 | XXI.1.1 | XXI.1.1 | 746  | KY042138   | pigeon                 | Pakistan | Lahore_126                 | 2015 |
| VI_g | XXI.1.1 | XXI.1.1 | XXI.1.1 | 747  | KY042139   | pigeon                 | Pakistan | Lahore_146                 | 2016 |
| VI_g | XXI.1.1 | XXI.1.1 | XXI.1.1 | 748  | JQ039385   | dove                   | Nigeria  | dove_VRD07_163             | 2007 |
| VI_g | XXI.1.1 | XXI.1.1 | XXI.1.1 | 2349 | MH717070.1 | pigeon                 | Pakistan | AJK_AW_p54                 | 2018 |
| VI_g | XXI.1.1 | XXI.1.1 | XXI.1.1 | 2396 | MH996953   | pigeon                 | Nigeria  | Kazaure_VRD231_42          | 2007 |
| VI_g | XXI.1.1 | XXI.1.1 | XXI.1.1 | 2437 | MK005973   | pigeon                 | Egypt    | Souqal_Cairo_39_L_G23_1105 | 2015 |
| VI_m | XXI.1.2 | XXI.1.2 | XXI.1.2 | 873  | KU862297   | pigeon                 | Pakistan | Lahore_AW_1                | 2014 |
| VI_m | XXI.1.2 | XXI.1.2 | XXI.1.2 | 874  | KU862298   | pigeon                 | Pakistan | Lahore_AW_2                | 2015 |
| VI_m | XXI.1.2 | XXI.1.2 | XXI.1.2 | 875  | KU885949   | pigeon                 | Pakistan | MZS_UVAS                   | 2014 |
| VI_m | XXI.1.2 | XXI.1.2 | XXI.1.2 | 876  | KX236100   | pigeon                 | Pakistan | 21A                        | 2015 |
| VI_m | XXI.1.2 | XXI.1.2 | XXI.1.2 | 877  | KX236101   | pigeon                 | Pakistan | 25A                        | 2015 |
| VI_m | XXI.1.2 | XXI.1.2 | XXI.1.2 | 878  | KY042135   | pigeon                 | Pakistan | 22A                        | 2015 |
| VI_m | XXI.1.2 | XXI.1.2 | XXI.1.2 | 879  | KY042140   | pigeon                 | Pakistan | Jallo_Lahore_221A          | 2016 |
| VI_m | XXI.1.2 | XXI.1.2 | XXI.1.2 | 880  | KY042141   | pigeon                 | Pakistan | Jallo_Lahore_221B          | 2016 |
| VI_m | XXI.1.2 | XXI.1.2 | XXI.1.2 | 2350 | MH717071.1 | pigeon                 | Pakistan | AJK_AW_p51                 | 2018 |
| VI_m | XXI.1.2 | XXI.1.2 | XXI.1.2 | 2351 | MH717072.1 | pigeon                 | Pakistan | AJK_AW_p52                 | 2018 |
| VI_m | XXI.1.2 | XXI.1.2 | XXI.1.2 | 2352 | MH717073.1 | pigeon                 | Pakistan | AJK_AW_p53                 | 2018 |
| VI_i | XXI.2   | XXI.2   | XXI.2   | 762  | HG424625   | pigeon                 | Nigeria  | NIE13_005                  | 2013 |
| VI_i | XXI.2   | XXI.2   | XXI.2   | 763  | JN638234   | dove                   | Italy    | 11RS98_102VIR              | 2011 |
| VI_i | XXI.2   | XXI.2   | XXI.2   | 764  | JN638235   | dove                   | Italy    | 11RS100_104VIR             | 2011 |
| VI_i | XXI.2   | XXI.2   | XXI.2   | 765  | JN638236   | dove                   | Italy    | 10RS6171_7154VIR           | 2010 |
| VI_i | XXI.2   | XXI.2   | XXI.2   | 766  | KU377533   | Turtle_Dove            | Italy    | 10VIR7155                  | 2010 |
| VI_i | XXI.2   | XXI.2   | XXI.2   | 767  | KU377535   | Turtle_Dove            | Italy    | 12VIR1876_1                | 2012 |
| VI_i | XXI.2   | XXI.2   | XXI.2   | 768  | KU377536   | Turtle_Dove            | Italy    | 12VIR604                   | 2012 |
| VI_i | XXI.2   | XXI.2   | XXI.2   | 2104 | MG456676.1 | collared_dove          | Iran     |                            | 2014 |
| VI_i | XXI.2   | XXI.2   | XXI.2   | 2148 | MH044693.1 | pigeon                 | Iran     | Konarak_Barin              | 2017 |
| VI_i | XXI.2   | XXI.2   | XXI.2   | 2286 | MH377298.1 | eurasian_collared_dove | Israel   | PHL264746                  | 2010 |
