# Supplementary material for: Updated unified phylogenetic classification system and revised nomenclature for Newcastle disease virus
Source: PubMed Central journal article supplement (PMC6876278; doi:10.1016/j.meegid.2019.103917), 2019-10
Supplement: mmc3.pdf [file mmc3.pdf]

Supplemental Table S3. Complete fusion gene “pilot” dataset of class II NDV used in this study. The dataset contains 125 sequences and was used to build the trees depicted in Figure 2.

| Genotypes based on the new classification and nomenclature system | Based on Diel et al. 2012 | Acc. Number | Host                       | Country   | Isolate              | Year |
|-------------------------------------------------------------------|---------------------------|-------------|----------------------------|-----------|----------------------|------|
| I.1.1                                                             | I-a                       | AY935490    | chicken                    | Australia | 2_1334               | 2002 |
| I.1.1                                                             | I-a                       | AY935495    | chicken                    | Australia | 99_868_hi            | 1999 |
| I.1.1                                                             | I-a                       | M24693      | chicken                    | Australia | Queensland           | 1966 |
| I.1.2.1                                                           | I-c                       | EF564816    | redknot                    | USA       | NJ_A_101_1383        | 2001 |
| I.1.2.1                                                           | I-c                       | GQ918280    | black_headed_gull          | Sweden    |                      | 1994 |
| I.1.2.1                                                           | I-c                       | KX352834    | gull                       | Russia    | Tyva_14              | 2014 |
| I.1.2.2                                                           | I-d                       | AB465607    | chicken                    | Japan     | Ishi                 | 1962 |
| I.1.2.2                                                           | I-d                       | KC503476    | northern_pintail           | USA       | AK_44500_136         | 2009 |
| I.1.2.2                                                           | I-d                       | KC503479    | redpoll                    | Russia    | Nikita_530_FFNK2     | 2008 |
| I.2                                                               | I-b                       | AY965079    | duck                       | Russia    | FarEast_2713         | 2001 |
| I.2                                                               | I-b                       | HG326605    | spur_winged_goose          | Nigeria   | NIE08_121            | 2008 |
| I.2                                                               | I-b                       | KC503453    | American_green_winged_teal | USA       | AK_44493_716         | 2009 |
| II                                                                | II                        | AF077761    | chicken                    | USA       | Lasota               | 1946 |
| II                                                                | II                        | GU978777    | chicken                    | USA       | TX_GB                | 1948 |
| II                                                                | II                        | JN872151    | chicken                    | USA       | Hitchner_B1          | 1947 |
| III                                                               | III                       | EF201805    | avian                      |           | Mukteswar            | 1940 |
| III                                                               | III                       | GU182327    | chicken                    | Pakistan  | SPVC_Karachi_1       | 1974 |
| III                                                               | III                       | MH996904    | pigeon                     | Bulgaria  | Novo_Selo_1161       | 1995 |
| IV                                                                | IV                        | AY741404    | Fowl                       | UK        | Herts                | 1933 |
| IV                                                                | IV                        | MH996900    | pullet                     | Bulgaria  | Plovdiv_1153         | 1959 |
| V.1                                                               | V-b                       | JN872189    | parrot                     | USA       | Coast_8278           | 1982 |
| V.1                                                               | V-b                       | JN872194    | chicken                    | Honduras  | 498109_15            | 2007 |
| V.1                                                               | V-b                       | JN942027    | fighting_cock              | Nicaragua | 95066_9              | 2001 |
| V.2                                                               | V-c                       | EU518682    | Dove                       | Mexico    | Distrito_Federal_462 | 2004 |
| V.2                                                               | V-c                       | EU518684    | chicken                    | Mexico    | Estado_de_Mexico_466 | 2006 |
| V.2                                                               | V-c                       | JQ697744    | chicken                    | Mexico    | NC04_635             | 2010 |
| VI.2.1.1.1                                                        | VI-a                      | JX901367    | pigeon                     | USA       | PA_810               | 2008 |
| VI.2.1.1.1                                                        | VI-a                      | JX901351    | pigeon                     | USA       | NJ_721               | 2007 |

|              |       |            |               |               |                          |      |
|--------------|-------|------------|---------------|---------------|--------------------------|------|
| VI.2.1.1.1   | VI-n  | MG018211   | ECDO          | USA           | TX_1185_kidney_26981_3_A | 2015 |
| VI.2.1.1.2.1 | VI-j  | JX094510   | pigeon        | China         | sms12                    | 2012 |
| VI.2.1.1.2.1 | VI-j  | JX901110   | pigeon        | Belgium       | 248_                     | 1998 |
| VI.2.1.1.2.1 | VI-j  | JX486553   | pigeon        | China         | LHLJ_110813              | 2011 |
| VI.2.1.1.2.2 | VI-k  | KT163262   | pigeon        | China         | SH_167                   | 2013 |
| VI.2.1.1.2.2 | VI-k  | JX901124   | pigeon        | Belgium       | 11_09620                 | 2011 |
| VI.2.1.1.2.2 | VI-k  | MG840654.1 | pigeon        | China         | Ningxia_2068             | 2016 |
| VI.1         | VI-b  | AF109885   | domestic_fowl | Great_Britain | GB1168                   | 1984 |
| VI.1         | VI-b  | FJ410145   | pigeon        | USA           | NY                       | 1984 |
| VI.1         | VI-b  | FJ865434   | pigeon        | China         | S_1                      | 2002 |
| VI.2.2.2     | VI-e  | FJ480825   | pigeon        | China         | PG_JS_1                  | 2005 |
| VI.2.2.2     | VI-e  | JX244794   | pigeon        | China         | 100                      | 2008 |
| VI.2.2.2     | VI-e  | KJ607163   | pigeon        | China         | LJS_1                    | 2004 |
| VI.2.2.1     | VI-f  | JN872180   | waterfowl     | USA           | TX_209682                | 2002 |
| VI.2.2.1     | VI-f  | JN872182   | pigeon        | USA           | 12339                    | 1998 |
| VI.2.2.1     | VI-f  | JX901312   | pigeon        | USA           | 101                      | 2001 |
| VI.2.1.2     | VI-h  | HG326604   | pigeon        | Nigeria       | NIE09_1898               | 2009 |
| VI.2.1.2     | VI-h  | JX518532   | laughing_dove | Kenya         | B2_Isiolo                | 2012 |
| VI.2.1.2     | VI-h  | HG424627   | pigeon        | Nigeria       | NIE13_92                 | 2013 |
| VII.1.1      | VII-b | EF589133   | pheasant      | China         | 98_Guizhou               | 1998 |
| VII.1.1      | VII-d | EF579733   | chicken       | China         | Shandong_Pyan            | 2004 |
| VII.1.1      | VII-e | AB853927   | chicken       | Japan         | Ibaraki_SG106            | 1999 |
| VII.1.1      | VII-j | KC542905   | chicken       | China         | Liaoning_1_2009          | 2009 |
| VII.1.1      | VII-l | KX268351   | chicken       | Iran          | Behshahr                 | 2015 |
| VII.1.2      | VII-f | AY028995   | fowl          | China         | A7                       | 1996 |
| VII.1.2      | VII-f | GQ338309   | pigeon        | China         | 18                       | 2003 |
| VII.1.2      | VII-f | DQ227246   | goose         | China         | Jiangsu_JS02             | 1999 |
| VII.2        | VII-h | MF622047   | chicken       | South_Africa  | RBWW_3                   | 2013 |
| VII.2        | VII-i | KU862293   | Parakeet      | Pakistan      | Karachi_AW_1             | 2014 |
| VII.2        | VII-i | HQ697254   | chicken       | Indonesia     | Banjarmasin_10           | 2010 |
| VII.2        | VII-k | KY747479   | chicken       | Namibia       | 5620                     | 2016 |
| VII.2        | VII-a | JN986837   | chicken       | Netherlands   | 152608_ancestral         | 1993 |
| VIII         | VIII  | AY734534   | chicken       | Argentina     | Trenque_Lauquen          | 1970 |
| VIII         | VIII  | FJ751918   | chicken       | China         | QH1                      | 1979 |

|          |        |          |              |              |                              |      |
|----------|--------|----------|--------------|--------------|------------------------------|------|
| VIII     | VIII   | JX012096 |              | Malaysia     | AF2240                       | 1960 |
| IX       | IX     | AF458009 | chicken      | China        | FJ_1                         | 1985 |
| IX       | IX     | FJ436303 | chicken      | China        | ZJ_1                         | 1986 |
| IX       | IX     | FJ436302 | chicken      | China        | F48E8                        | 1948 |
| X        | X-a    | FJ705468 | mottled_duck | USA          | TX_130                       | 2011 |
| X        | X-a    | KX857716 | Redhead      | USA          | ndv42_AI09_4117              | 2009 |
| X        | X-b    | FJ705466 | mallard      |              | 99_376                       | 1999 |
| X        | X-b    | KX857721 | Mallard      | USA          | MN_AI10_3434                 | 2010 |
| XI       | XI     | HQ266602 | chicken      | Madagascar   | MG_725                       | 2008 |
| XI       | XI     | JX518882 | chicken      | Madagascar   | MGMNJ                        | 2009 |
| XI       | XI     | JX518884 | chicken      | Madagascar   | MGS1595T                     | 2011 |
| XII.1    | XII-a  | KU594615 | chicken      | Peru         | Apurimac_50009               | 2005 |
| XII.1    | XII-a  | KU594616 | gamecock     | Peru         | Lurin_40871                  | 2004 |
| XII.1    | XII-a  | KU594618 | chicken      | Peru         | Arequipa_VFAR_81             | 2015 |
| XII.2    | XII-b  | JN627504 | goose        | China        | GD_12                        | 2011 |
| XII.2    | XII-b  | JN627507 | goose        | China        | GD_1003                      | 2010 |
| XII.2    | XII-b  | MF278927 | goose        | China        | FS_SS_292                    | 2013 |
| XIII.1.1 | XIII-a | JN942034 | ostrich      | South_Africa | 45445_3                      | 1995 |
| XIII.1.1 | XIII-a | JN942043 | roller       | Tanzania     | 47385_11                     | 2010 |
| XIII.1.1 | XIII-a | MF409241 | chicken      | Zambia       | Chiwoko                      | 2015 |
| XIII.2.1 | XIII-b | GU182323 | chicken      | Pakistan     | SPVC_Karachi_43              | 2008 |
| XIII.2.1 | XIII-b | GU182331 | chicken      | Pakistan     | SPVC_Karachi_33_             | 2007 |
| XIII.2.1 | XIII-b | KF113338 | chicken      | Pakistan     | University_Diagnostic_Lab_12 | 2010 |
| XIII.2.2 | XIII-b | KM056349 | chicken      | India        | ndv42_gopalpura_4            | 2013 |
| XIII.2.2 | XIII-b | KT734767 | chicken      | India        | Polashbari                   | 2014 |
| XIII.2.2 | XIII-b | KX372707 | chicken      | India        | Nagpur_3                     | 2011 |
| XIII.1.2 | XIII-a | JQ267579 | chicken      | Iran         | EMM_7                        | 2011 |
| XIII.1.2 | XIII-a | JQ267584 | chicken      | Iran         | EMM_2                        | 2008 |
| XIII.1.2 | XIII-a | JQ267585 | chicken      | Iran         | EMM_1                        | 2008 |
| XIV.1    | XIV-a  | HF969205 | turkey       | Nigeria      | NIE09_2071                   | 2009 |
| XIV.1    | XIV-a  | JN872165 | chicken      | Niger        | VIR_1377_7                   | 2006 |
| XIV.1    | XIV-a  | JQ039386 | chicken      | Nigeria      | VRD08_36                     | 2008 |
| XIV.2    | XIV-b  | HF969187 | chicken      | Nigeria      | NIE08_453                    | 2008 |
| XIV.2    | XIV-b  | HF969210 | chicken      | Nigeria      | NIE10_139                    | 2011 |

|         |         |          |                |                    |                    |      |
|---------|---------|----------|----------------|--------------------|--------------------|------|
| XIV.2   | XIV-b   | KY171990 | chicken        | Nigeria            | KD_TW_03T_N45_720  | 2009 |
| XVI     | XVI     | JX915242 | chicken        | Dominican_Republic | 28138_4            | 1986 |
| XVI     | XVI     | JX915243 | chicken        | Mexico             | Queretaro_452_1947 | 1947 |
| XVI     | XVI     | JX186997 | chicken        | Dominican_Republic | 867                | 2008 |
| XVII    | XVII-a  | HF969176 | chicken        | Nigeria            | NIE10_310          | 2011 |
| XVII    | XVII-a  | HF969191 | chicken        | Nigeria            | NIE08_2042         | 2009 |
| XVII    | XVII-b  | HF969194 | chicken        | Nigeria            | NIE08_2199         | 2009 |
| XVIII.1 | XVIII-a | FJ772455 |                | Mauritania         | 1532_14            | 2006 |
| XVIII.1 | XVIII-a | JF966389 | guinea_fowl    | Mali               | ML038              | 2007 |
| XVIII.1 | XVIII-a | JX518885 | chicken        | Mali               | ML57051T           | 2010 |
| XVIII.2 | XVIII-b | HF969218 | chicken        | Ivory_Coast        | CIV08_42           | 2007 |
| XVIII.2 | XVIII-b | HG326600 | village_weaver | Ivory_Coast        | CIV08_32           | 2006 |
| XVIII.2 | XVIII-b | JX518886 | chicken        | Mali               | ML57072T           | 2010 |
| XIX     | V-a     | FJ705456 | cormorant      | USA                | MN_92_40140        | 1992 |
| XIX     | V-a     | JN942024 | cormorant      | USA                | WI_272409          | 2003 |
| XIX     | V-a     | KC433530 | cormorant      | USA                | FL_41105           | 2012 |
| XX      | VI-c    | AB853928 | chicken        | Japan              | Ibaraki_SM87       | 1987 |
| XX      | VI-c    | AF458016 | chicken        | China              | ZhJ_2              | 1986 |
| XX      | VI-c    | KY042142 | quail          | Korea              | 88_M               | 1988 |
| XXI     | VI-l    | KC205479 | chicken        | Ethiopia           | ETHMG1C            | 2011 |
| XXI.2   | VI-i    | JN638234 | dove           | Italy              | 11RS98_102VIR      | 2011 |
| XXI.2   | VI-i    | KU377533 | Turtle_dove    | Italy              | 10VIR7155          | 2010 |
| XXI.2   | VI-i    | KU377535 | Turtle_dove    | Italy              | 12VIR1876_1        | 2012 |
| XXI.1.2 | VI-m    | KU862298 | pigeon         | Pakistan           | Lahore_AW_2        | 2015 |
| XXI.1.2 | VI-m    | KY042135 | Pigeon         | Pakistan           | 22A                | 2015 |
| XXI.1.2 | VI-m    | KY042141 | Pigeon         | Pakistan           | Jallo_Lahore_221B  | 2016 |
| XXI.1.1 | VI-g    | JF824032 | pigeon         | Russia             | Vladimir_687       | 2005 |
| XXI.1.1 | VI-g    | KY042136 | Pigeon         | Pakistan           | Lahore_125         | 2015 |
| XXI.1.1 | VI-g    | KY042132 | Pigeon         | Egypt              | 73_OP_G29          | 2015 |
