# Supplementary material for: Updated unified phylogenetic classification system and revised nomenclature for Newcastle disease virus
Source: PubMed Central journal article supplement (PMC6876278; doi:10.1016/j.meegid.2019.103917), 2019-10
Supplement: mmc4.pdf [file mmc4.pdf]

Supplemental Table S4. Former sub-genotypes within class I and class II that did not pass the updated classification criteria (either one of 5% nucleotide distance, branch support equal or above 70%, at least 4 independent isolates) and were merged. The sub/genotype designation follows the newly proposed nomenclature and the former names are provided in parenthesis.

| <b>Distance between groups is below 5%</b>                                                   |                                |                                                  |                                                  |                                                |                                  |                                         |                                |
|----------------------------------------------------------------------------------------------|--------------------------------|--------------------------------------------------|--------------------------------------------------|------------------------------------------------|----------------------------------|-----------------------------------------|--------------------------------|
| <b>Class I</b>                                                                               |                                | <b>Class II genotype VI</b>                      |                                                  | <b>Class II genotype X</b>                     |                                  | <b>Class II genotype XVII</b>           |                                |
|                                                                                              | <b>1.2 (1c)</b>                |                                                  | <b>VI.1.2.1.1.1 (VI<sub>n</sub>)</b>             |                                                | <b>X (Xa)</b>                    |                                         | <b>XVII (XVII<sub>b</sub>)</b> |
| <b>1.2 (1d)</b>                                                                              | 3.68                           | <b>VI.1.2.1.1.1 (VIa)</b>                        | 3.46                                             | <b>X (Xb)</b>                                  | 4.83                             | <b>XVII (XVIIa)</b>                     | 4.59                           |
| <b>Class II genotype VII</b>                                                                 |                                | <b>Class II genotype VII</b>                     |                                                  | <b>Class II genotype VII</b>                   |                                  |                                         |                                |
|                                                                                              | <b>VII.1.1 (VIIe)</b>          |                                                  | <b>VII.1.1 (VII<sub>d</sub>+VII<sub>l</sub>)</b> |                                                | <b>VII.1.1 (VII<sub>j</sub>)</b> |                                         |                                |
| <b>VII.1.1 (b+j+d+l)</b>                                                                     | 4.21                           | <b>VII.1.1 (VII<sub>b</sub>+VII<sub>j</sub>)</b> | 4.68                                             | <b>VII.1.1 (VII<sub>b</sub>)</b>               | 3.31                             |                                         |                                |
| <b>Lack of branch support or sufficient number of epidemiologically independent isolates</b> |                                |                                                  |                                                  |                                                |                                  |                                         |                                |
| <b>Class II genotype VII</b>                                                                 |                                | <b>Class II genotype VII</b>                     |                                                  | <b>Class II genotype V</b>                     |                                  | <b>Class II genotype XXI</b>            |                                |
|                                                                                              | <b>VII.2 (VII<sub>i</sub>)</b> |                                                  | <b>VII.2 (VII<sub>k</sub>)</b>                   |                                                | <b>V (V<sub>d</sub>)</b>         |                                         | <b>XXI (VI<sub>l</sub>)</b>    |
| <b>VII.2 (VII<sub>h</sub>+VII<sub>k</sub>)</b>                                               | 9.61                           | <b>VII.2 (VII<sub>h</sub>)</b>                   | 11.10                                            | <b>V.1 + V.2 (V<sub>b</sub>+V<sub>c</sub>)</b> | 9.96                             | <b>XXI.1+XXI.2 (VI<sub>g</sub>+m+i)</b> | 13.24                          |
