# Supplementary material for: Updated unified phylogenetic classification system and revised nomenclature for Newcastle disease virus
Source: PubMed Central journal article supplement (PMC6876278; doi:10.1016/j.meegid.2019.103917), 2019-10
Supplement: mmc5.pdf [file mmc5.pdf]

Supplemental Table S5. Recommended sequences to be used for rooting purposes when building sub-trees for separate analysis of each genotype within class II. The sequence to use for rooting is marked with an asterisk. These sequences were used to root the trees presented in Supplemental Fig. S7 A-I.

| Genotype                                 | Root with (GenBank number)                    |
|------------------------------------------|-----------------------------------------------|
| I, II, VIII, IX, X, XI, XVI              | AY741404* and EF201805                        |
| III                                      | AY741404* and EU293914*                       |
| IV                                       | EF201805* and M24700*                         |
| V, VI, VII, XIV, XVII,<br>XVIII, XIX, XX | JX915243* and AF048763                        |
| XII                                      | JX915243* and JX393313                        |
| XIII                                     | AY741404*, EF201805, JX915243 and<br>AF048763 |
| XXI                                      | JX915243* and Z12111                          |
