# Supplementary material for: Updated unified phylogenetic classification system and revised nomenclature for Newcastle disease virus
Source: PubMed Central journal article supplement (PMC6876278; doi:10.1016/j.meegid.2019.103917), 2019-10
Supplement: mmc13.pdf [file mmc13.pdf]

Supplemental Fig. S8. Step-by-step guidelines of settings for building Maximum likelihood trees using the CIPRES Science Gateway (provided as screenshots from <http://www.phylo.org>).

## Folders

Total Storage: 62 MB

## CLASS II

- Data (3)
- Tasks (5)

## Create new task

[Task Summary](#) [Select Data](#) [Select Tool](#) [Set Parameters](#)**RAXML-HPC v.8 on XSEDE: NEW Interface! Phylogenetic tree inference using maximum likelihood/rapid bootstrapping run on XSEDE (Alexandros Stamatakis)**[Simple Parameters](#)Maximum Hours to Run (click here for help setting this correctly) \* Set a name for output files (-n) Enable ML searches under CAT (-F) Outgroup (-o) (one or more comma-separated outgroups, see comment for syntax) Specify the number of distinct rate categories (-c) \* Disable Rate Heterogeneity (-V) \* Supply a tree (Not available when doing rapid bootstrapping, -x) (-t) Specify a random seed value for parsimony inferences (-p) \* Enter a random seed value for parsimony inferences (-p "value" gives reproducible results from random starting tree) \* Specify an initial rearrangement setting (-i) \* Specify the distance from original pruning point (-i) \* Constraint (-g) Binary Backbone (-r) Use a mixed/partitioned model? (-q) Estimate individual per-partition branch lengths (-M) \* Estimate proportion of invariable sites (GTRGAMMA + I)  no  yesChoose an input file that excludes the range of positions specified in this file (-E) Weight characters as specified in this file (-a) Disable checking for sequences with no values (-O) Print output files that can be parsed by Mesquite. (-mesquite)

## Advanced Parameters

Please select the Data Type \*

## Nucleic Acid Options

Choose model for bootstrapping phase  [Not Mandatory]  GTRCAT  GTRGAMMA

Evaluate DNA partitions only under this model  [Not Mandatory]  HKY85  K80  JC69

## Protein Analysis Options

Choose GAMMA or CAT model: +  Protein GAMMA  Protein CAT

Protein Substitution Matrix +

Upload a Custom Protein Substitution Matrix (-P)

Use a Partition file that specifies AA Matrices

Select the First Protein Substitution Matrix Called in Your Partition File

Select the Second Protein Substitution Matrix Called in Your Partition File

Select the Third Protein Substitution Matrix Called in Your Partition File

Select the Fourth Protein Substitution Matrix Called in Your Partition File

Select the Fifth Protein Substitution Matrix Called in Your Partition File

Use empirical frequencies? [F]  No  Yes

Make an ML estimate of frequencies [X]  No  Yes

## RNA Secondary Structure Options

Upload a Secondary Structure File (-S)

Use an RNA Secondary Structure Substitution Model (-A) +

## Binary Matrix Options

---

Binary data model (-m) +  Binary CAT  Binary GAMMA

---

## Multiple State Morphological Matrix Options

---

Multiple State Data Model (-m) +  Multi-state CAT  Multi-state GAMMA

Select a Multiple state data model (-K) +  Ordered  MK  GTR

---

## Configure the Analysis

---

Select the Analysis Type \*

Specify the number alternative runs on distinct starting trees? (-N) +

Enter number of number alternative runs (-N) +

File with topologies for bipartitions (-z)

Don't use BFGS searching algorithm (--no-bfgs)

Write intermediate tree files to a file (-j)

Use ML search convergence criterion. (-D)

Specify majority rule consensus tree (-J) technique +

---

## Ascertainment Bias Configuration

---

Correct for Ascertainment bias (ASC\_)  no  yes

Ascertainment bias correction type (--asc-corr)  [Not Mandatory]  Lewis  Felsenstein  Stamatakis

Choose Ascertainment bias correction file 1 (will be named p1.txt) +

Choose Ascertainment bias correction file 2 (will be named p2.txt) +

Choose Ascertainment bias correction file 3 (will be named p3.txt) +

Choose Ascertainment bias correction file 4 (will be named p4.txt) +

Choose Ascertainment bias correction file 5 (will be named p5.txt) +

Choose Ascertainment bias correction file 6 (will be named p6.txt) +

---



## Configure more memory

---

I have a data set that may require more than 20 GB of memory +

Enter the number of patterns in your dataset

Enter the number of taxa in your dataset

---

## Configure Bootstrapping

---

Choose a Bootstrapping Type  No Bootstrapping  Non-parametric Bootstrapping (-b)  Rapid Bootstrapping (-x)

Enter a random seed value for bootstrapping +

Print branch lengths (-k)

Specify bootstrap protocol +  Specify an explicit number of bootstraps  Let RaxML halt bootstrapping automatically

Bootstrap iterations (-N) +

Select Bootstopping Criterion: (autoMRE is recommended)

Select the criterion for a posteriori bootstopping analysis (-l) +

File with topologies for a posteriori bootstopping (-z)

---

Save Parameters

Reset

Cancel

---

[Advanced Help](#)
